# Supplementary material
Source: publisher figshare collection journal article supplement (https://tandf.figshare.com/articles/dataset/_/23596523)

## 1/3

***On cardstock, print out tokens (below) and cut them out***

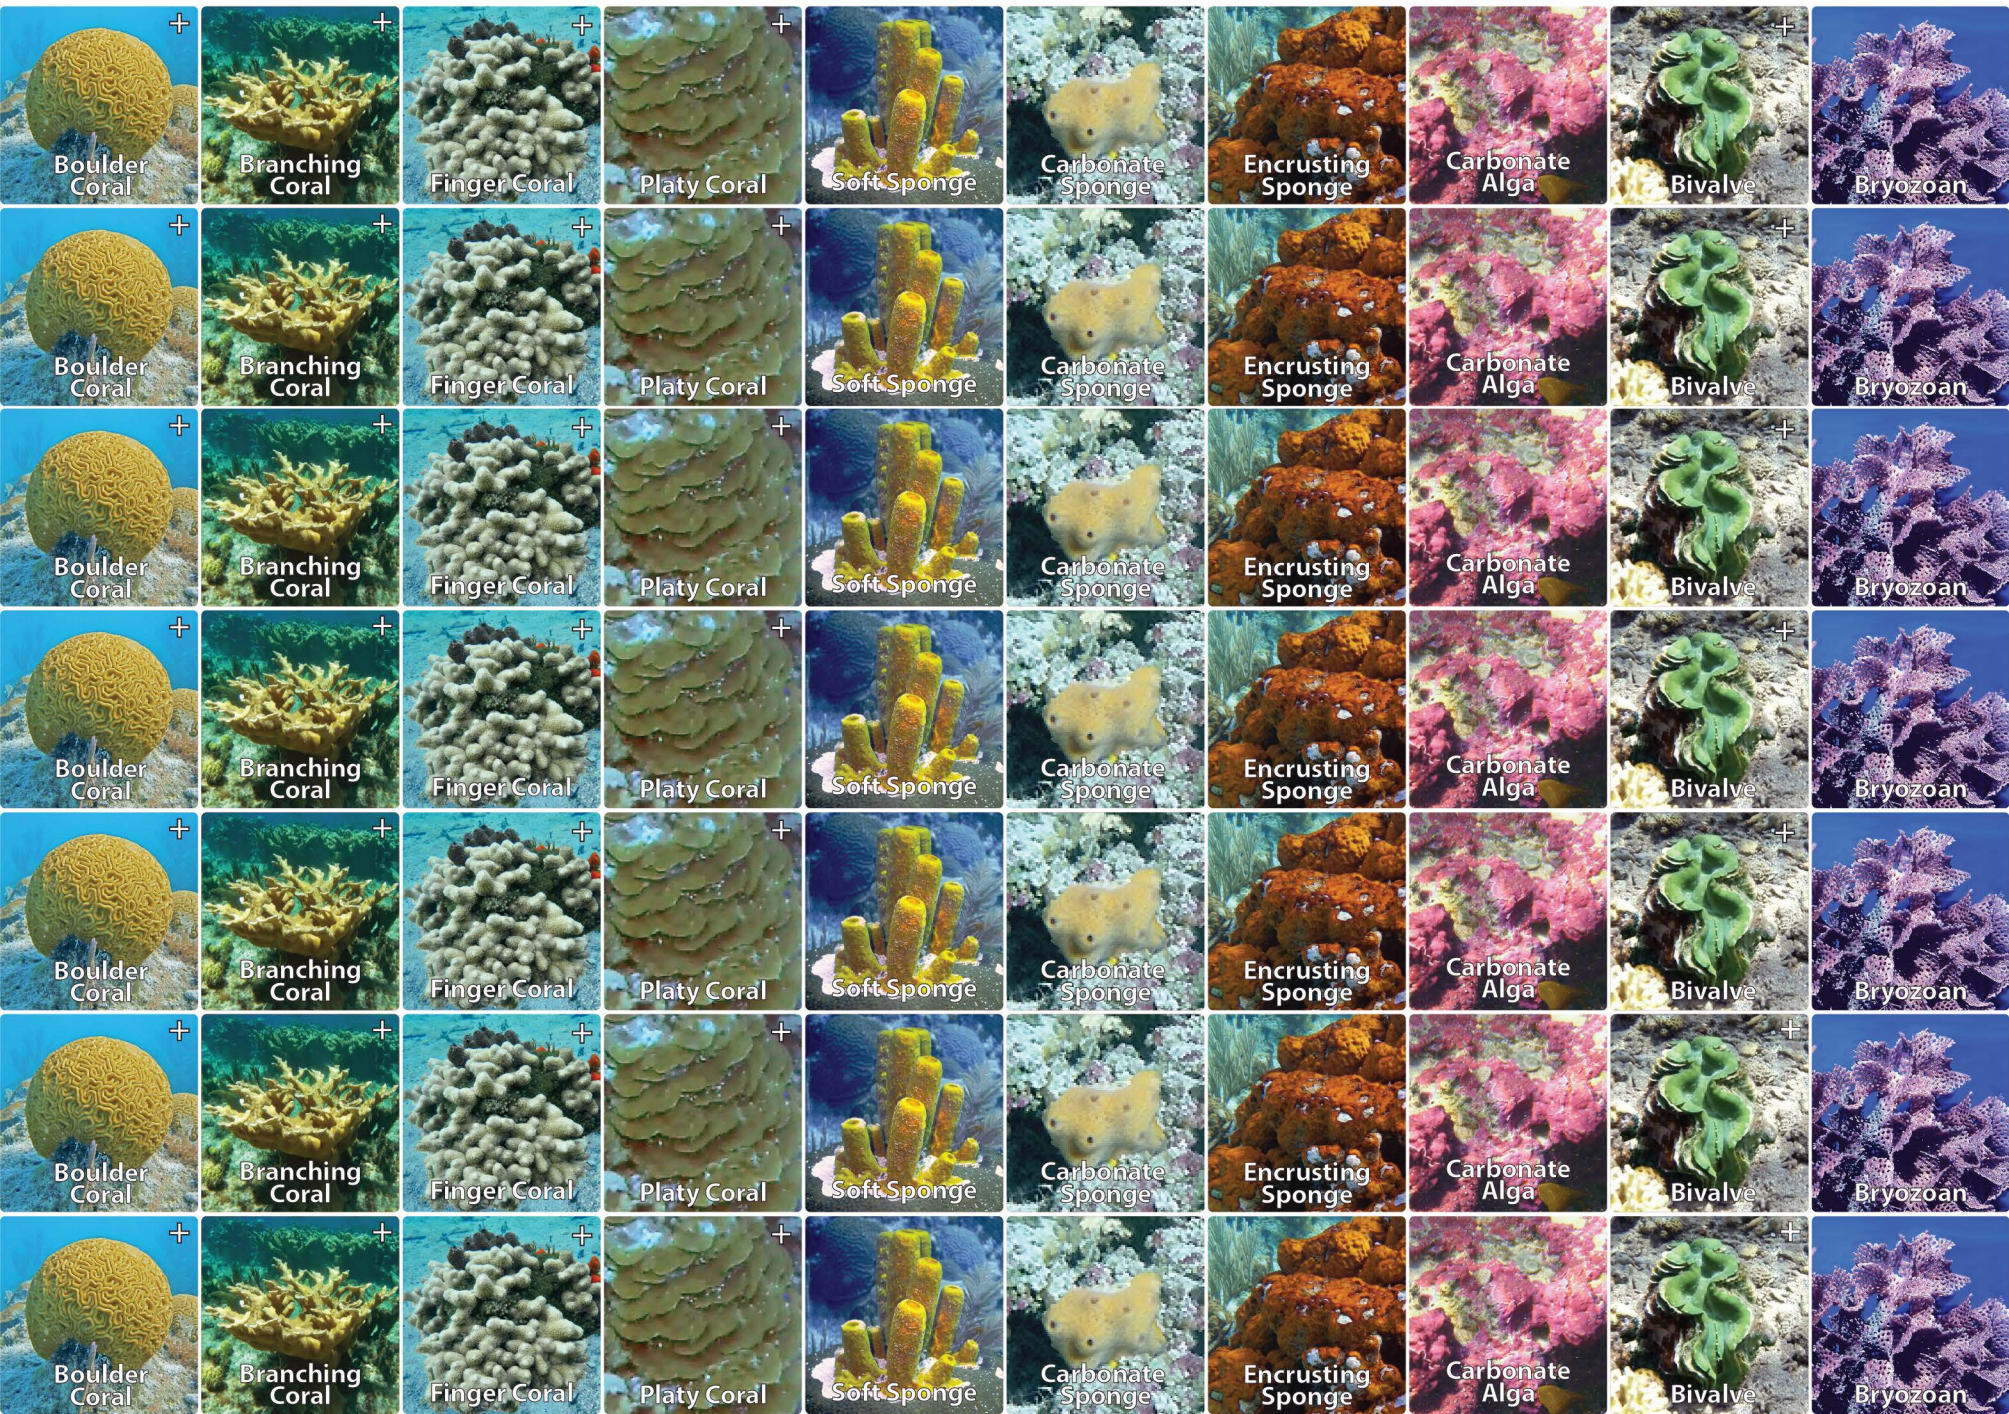



## 1/3

***On cardstock, print out tokens (below) and cut them out***





## 1/3

***On cardstock, print out tokens (below) and cut them out***





## 1/3

***On cardstock, print out tokens (below) and cut them out***





## 1/3

1/3

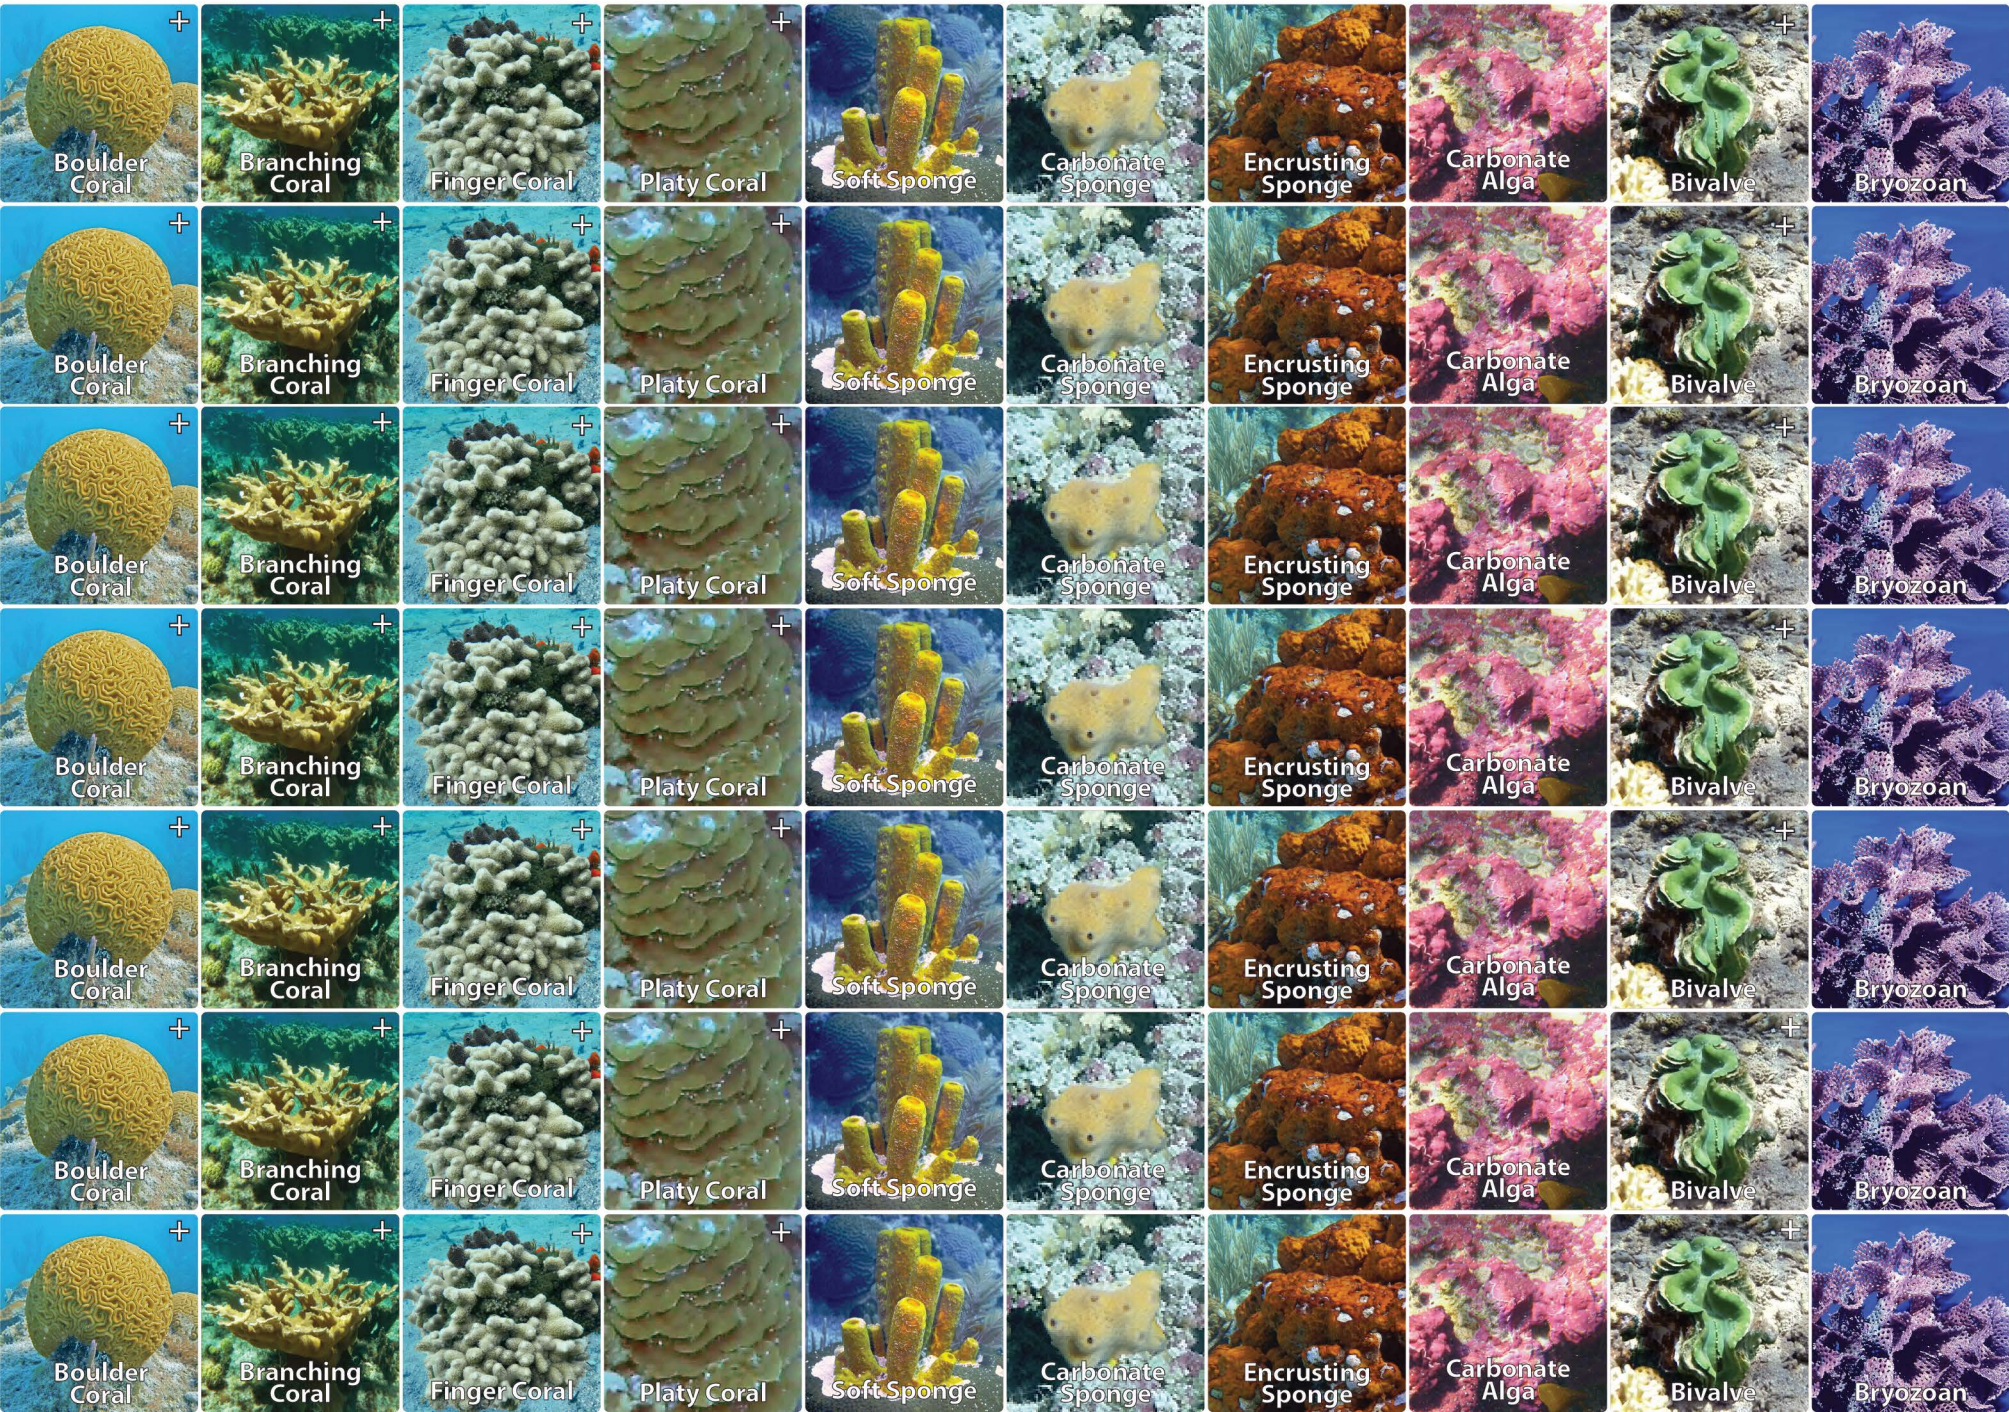



# Reef Survivor Reef Builders (print 3x)

2/3

*On cardstock, print out tokens (below) and cut them out*

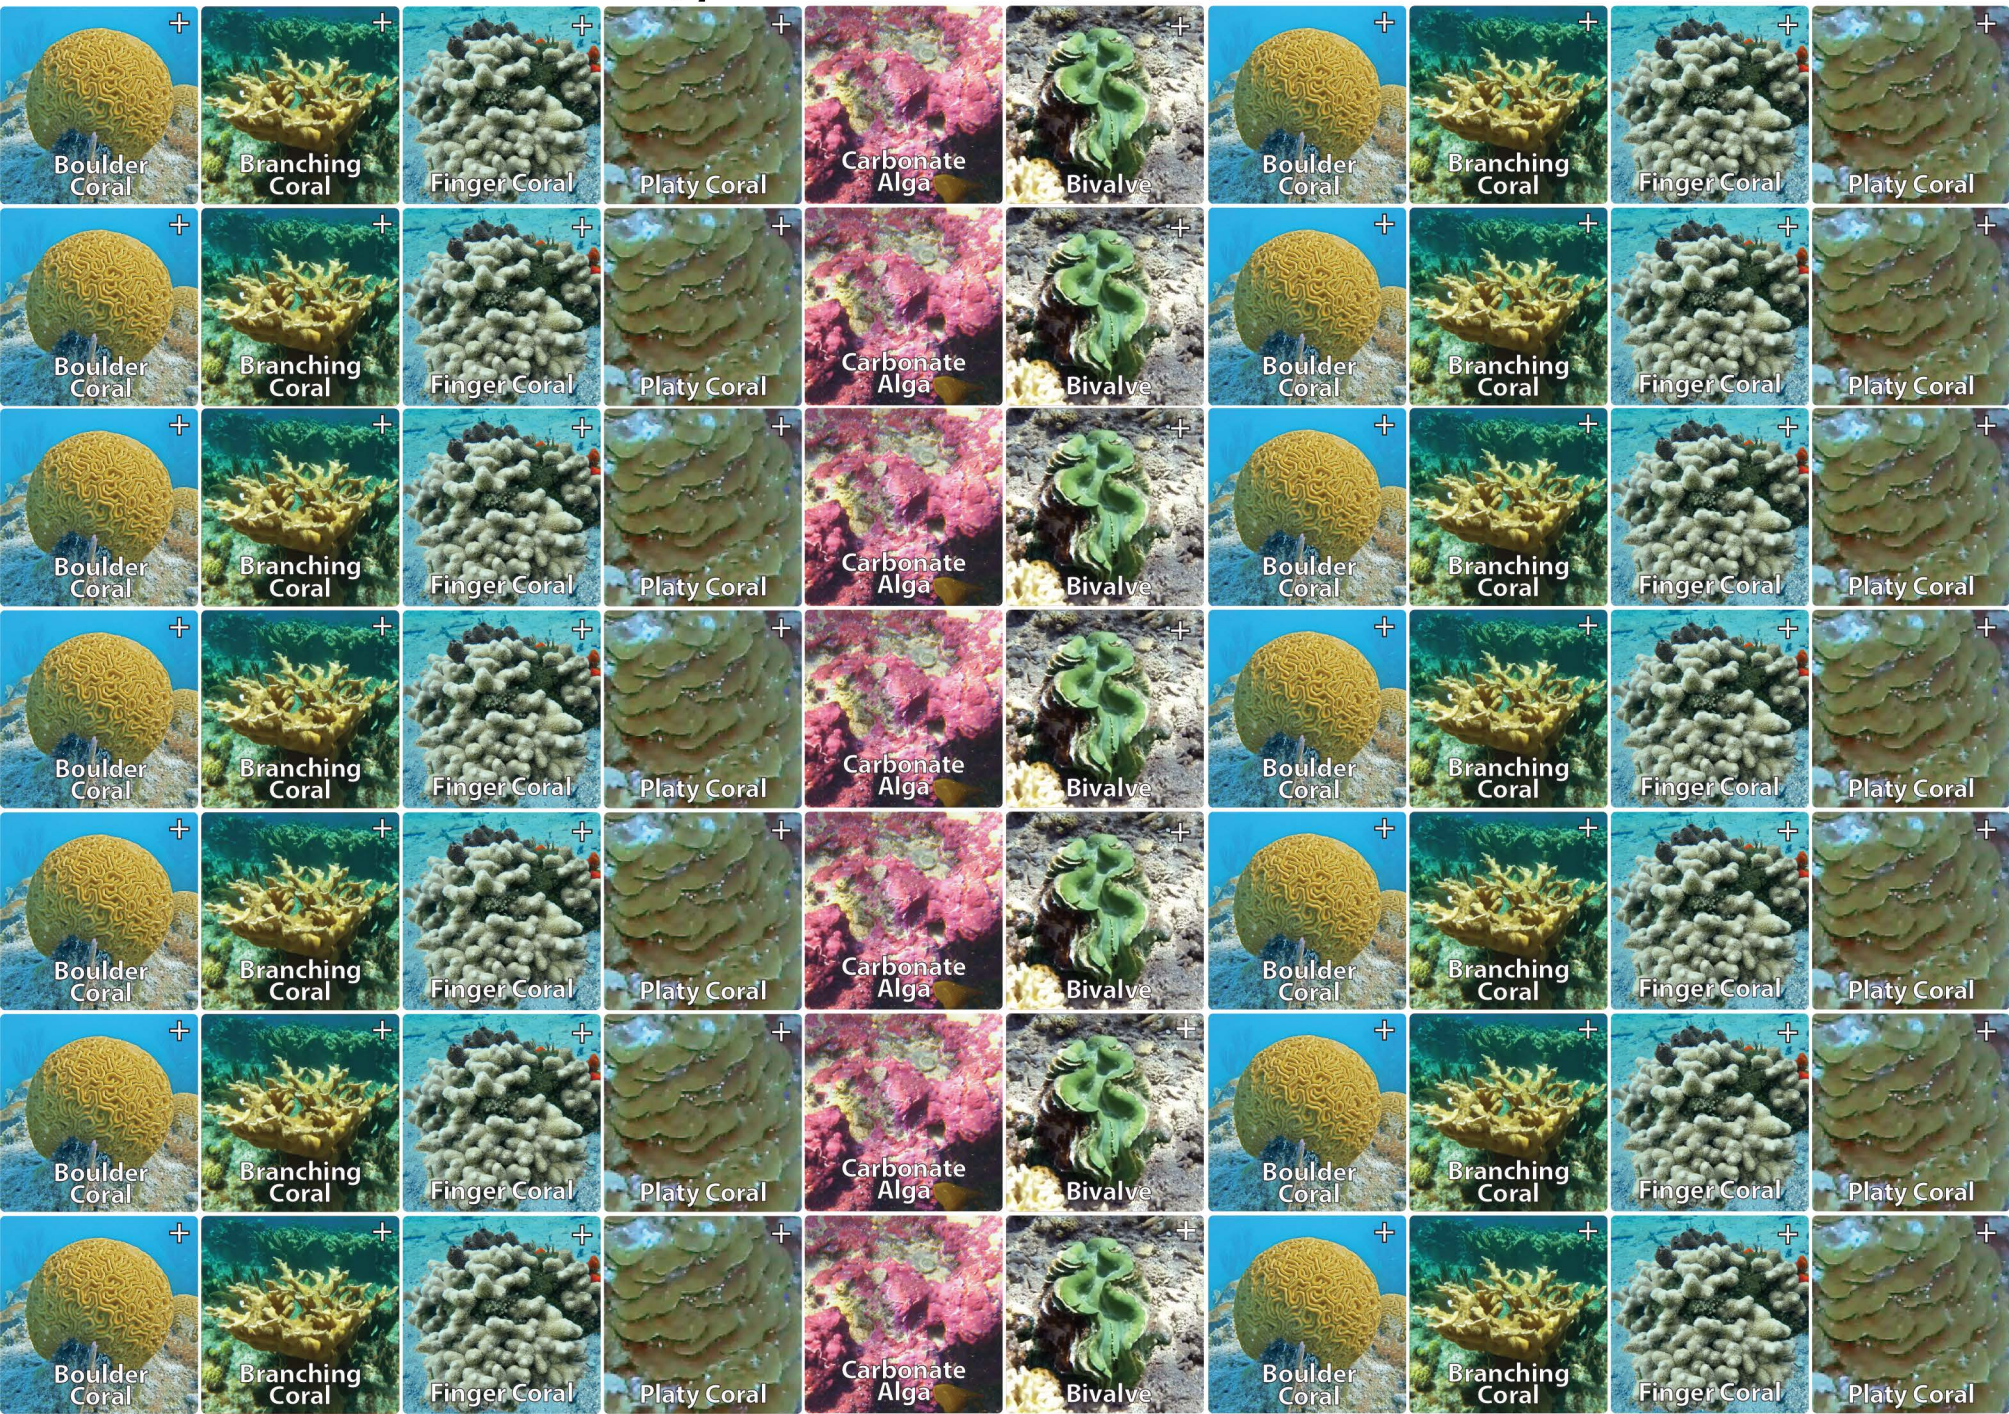



## 2/3

2/3





## 2/3

***On cardstock, print out tokens (below) and cut them out***





# Reef Survivor Reef Builders (print 1x)

3/3

*On cardstock, print out tokens (below) and cut them out*

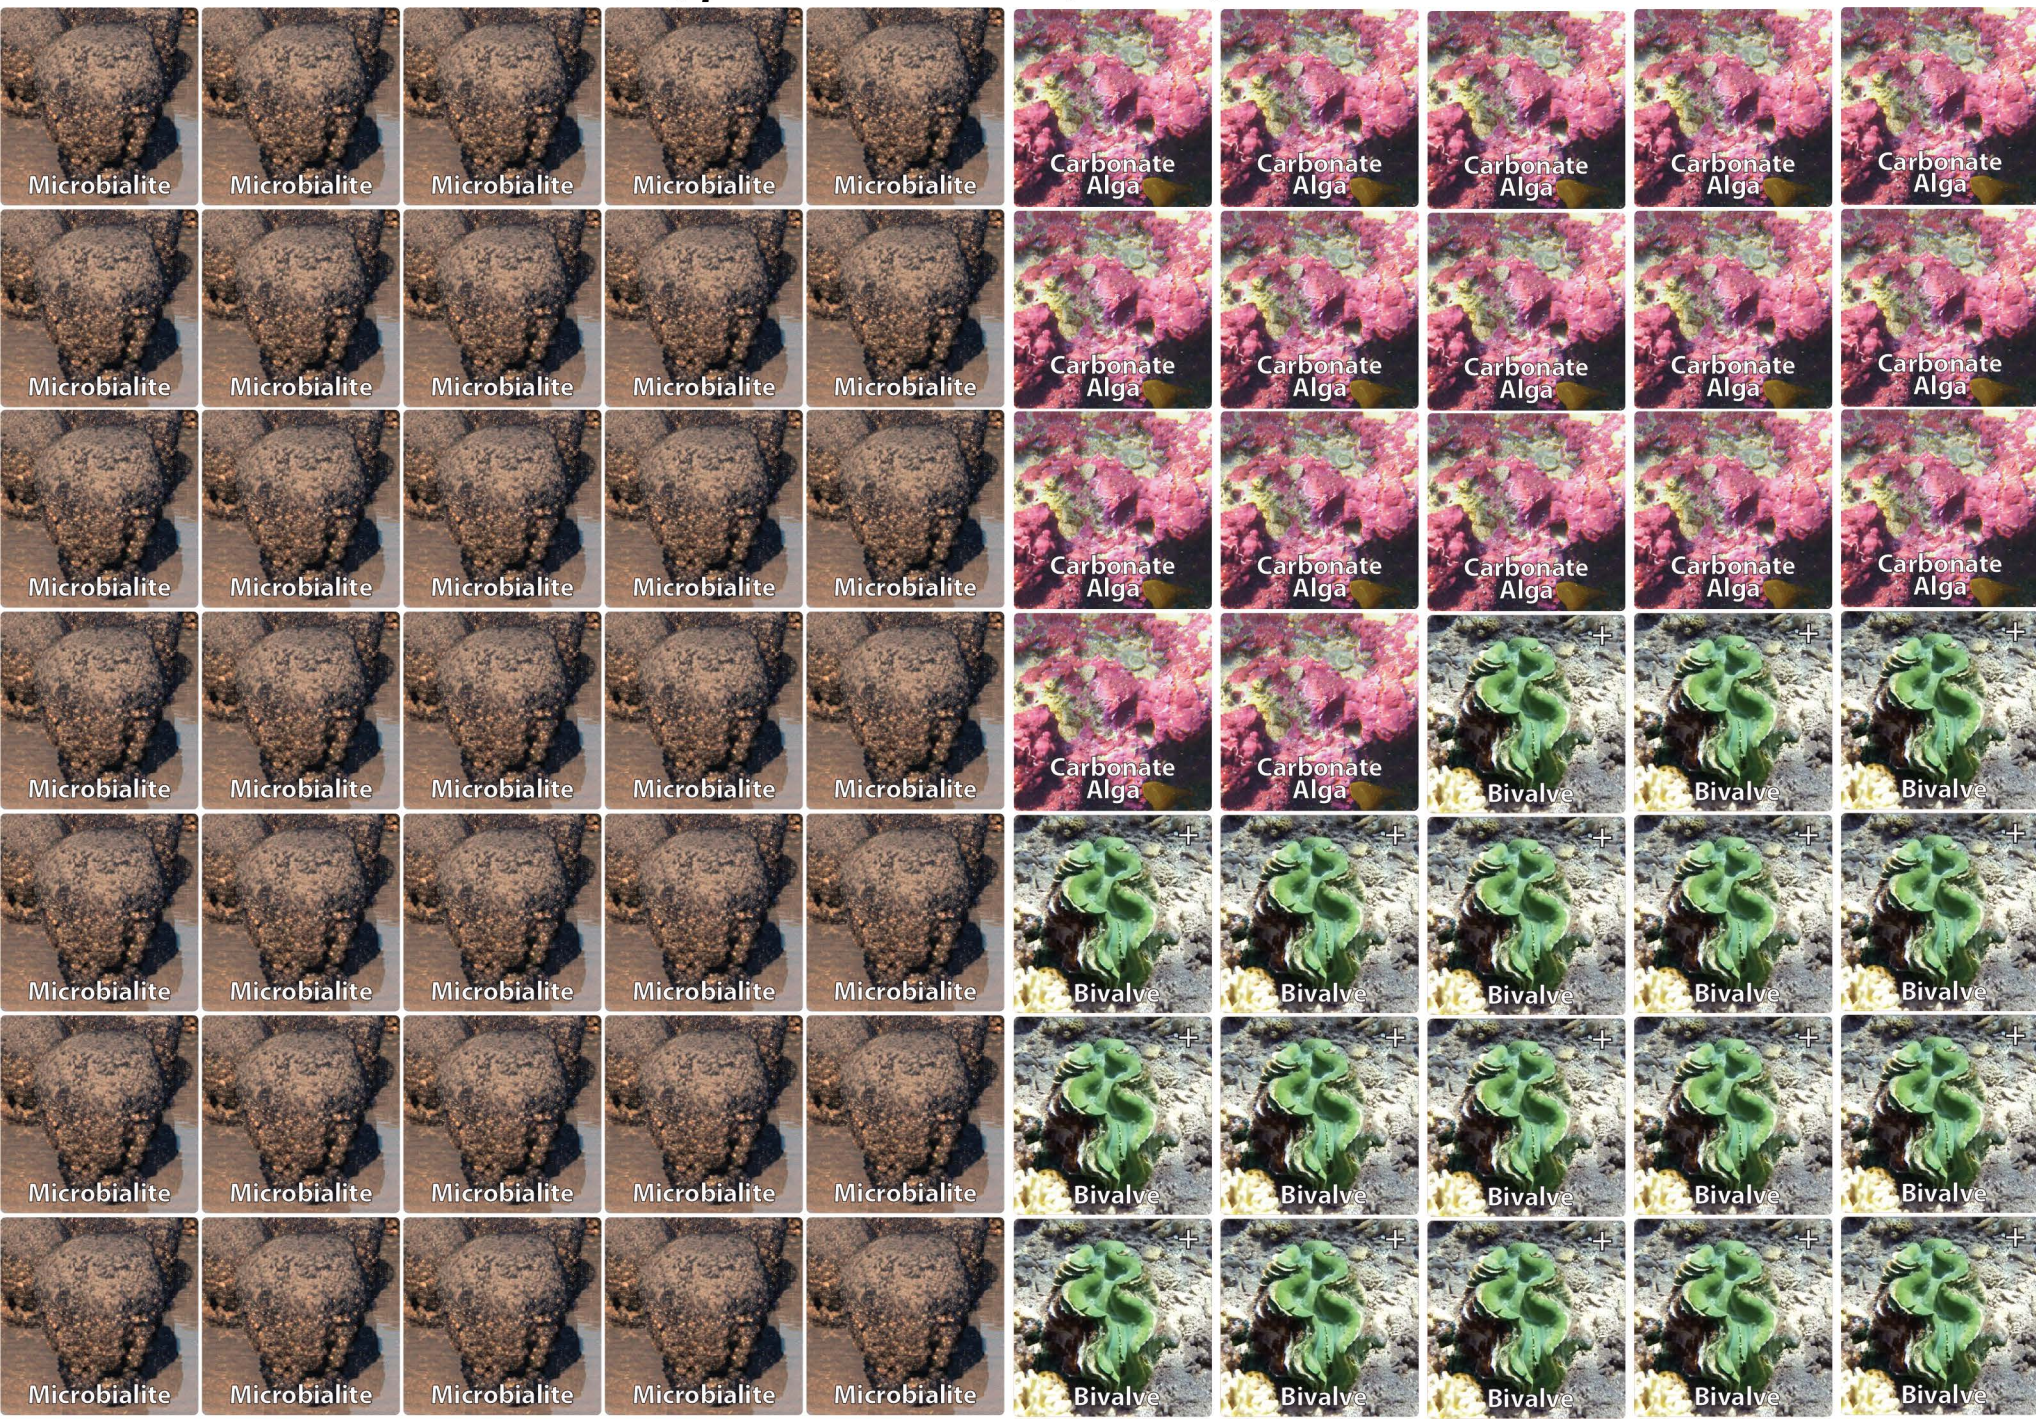



# Reef Survivor Dwellers and Coverers (Print Twice)

*On cardstock, print out tokens (below) and cut them out*

Fleshy  
Alga

Fleshy  
Alga

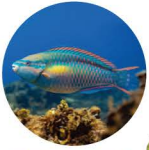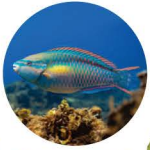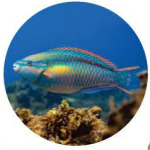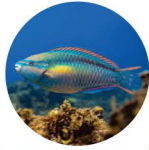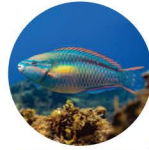

Fleshy  
Alga

Fleshy  
Alga

Fleshy  
Alga

Fleshy  
Alga

Fleshy  
Alga

Fish

Fish

Fish

Fish

Fish

Fleshy  
Alga

Fleshy  
Alga

Fleshy  
Alga

Fleshy  
Alga

Fleshy  
Alga

Fleshy  
Alga

Urchin

Urchin

Urchin

Urchin

Urchin

Fleshy  
Alga

Snail

Snail

Snail

Snail

Snail

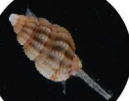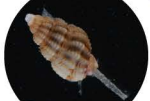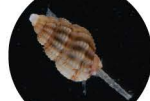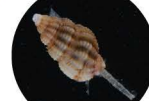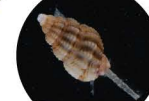



# Reef Survivor Dwellers and Coverers (Print Twice)

*On cardstock, print out tokens (below) and cut them out*

Fleshy  
Alga

Fleshy  
Alga

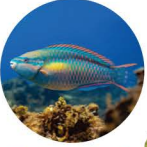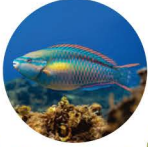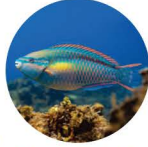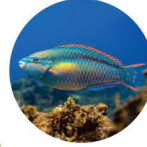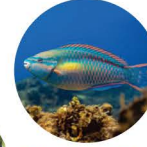

Fleshy  
Alga

Fleshy  
Alga

Fleshy  
Alga

Fleshy  
Alga

Fleshy  
Alga

Fish

Fish

Fish

Fish

Fish

Fleshy  
Alga

Fleshy  
Alga

Fleshy  
Alga

Fleshy  
Alga

Fleshy  
Alga

Fleshy  
Alga

Urchin

Urchin

Urchin

Urchin

Urchin

Fleshy  
Alga

Snail

Snail

Snail

Snail

Snail

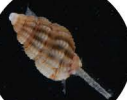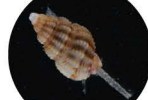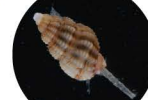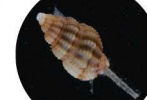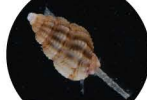

Supplement: Supplementary file 3 [file 1]
