# Supplementary material
Source: publisher figshare collection journal article supplement (https://tandf.figshare.com/articles/dataset/_/23596523)

# THE ATOLL

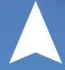

OPEN OCEAN

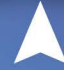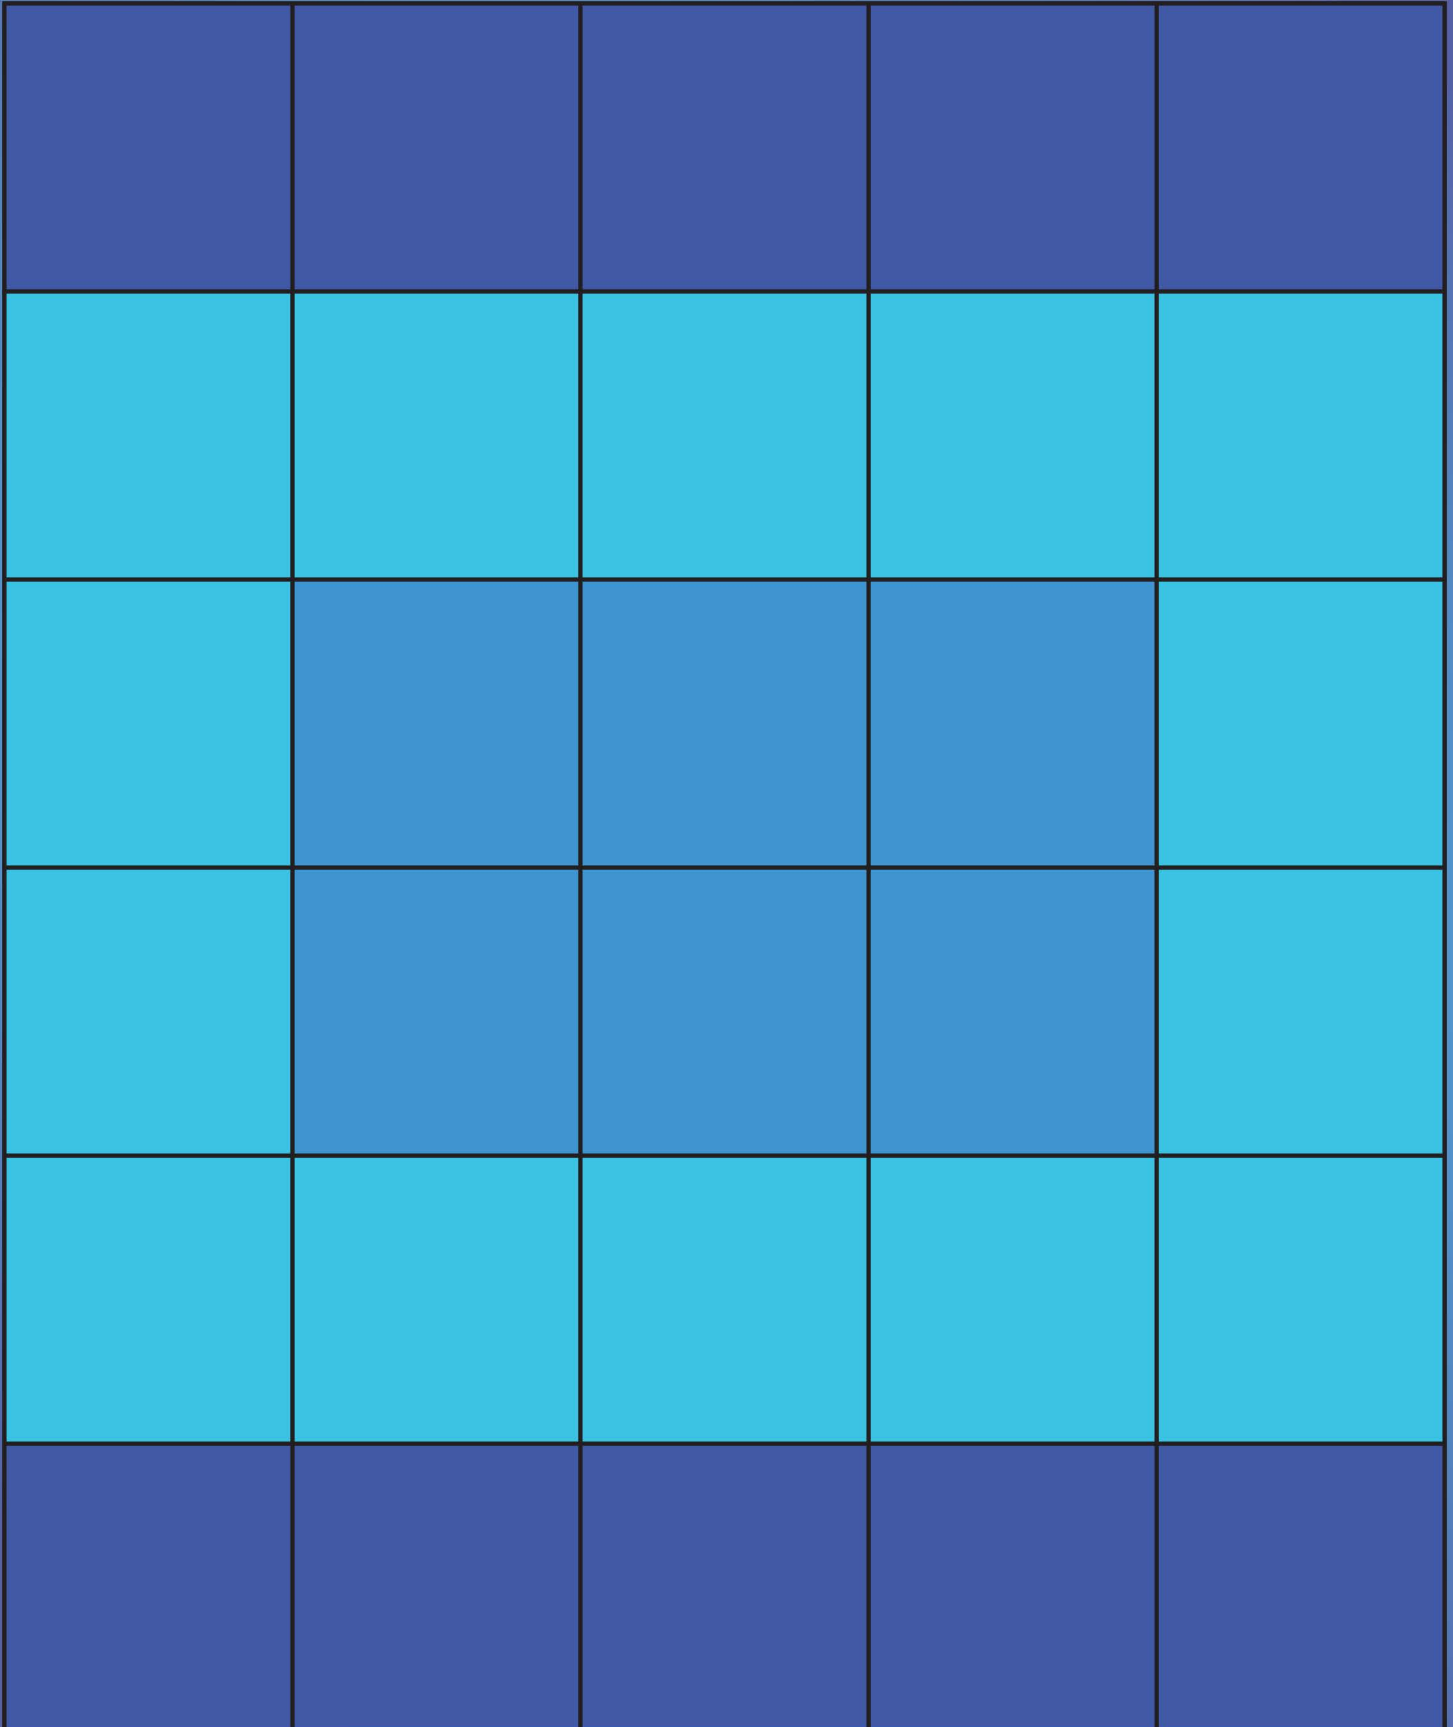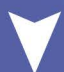

OPEN OCEAN (TOWARDS PLAYER)

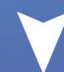

# THE FRINGING REEF

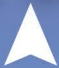

OPEN OCEAN

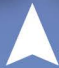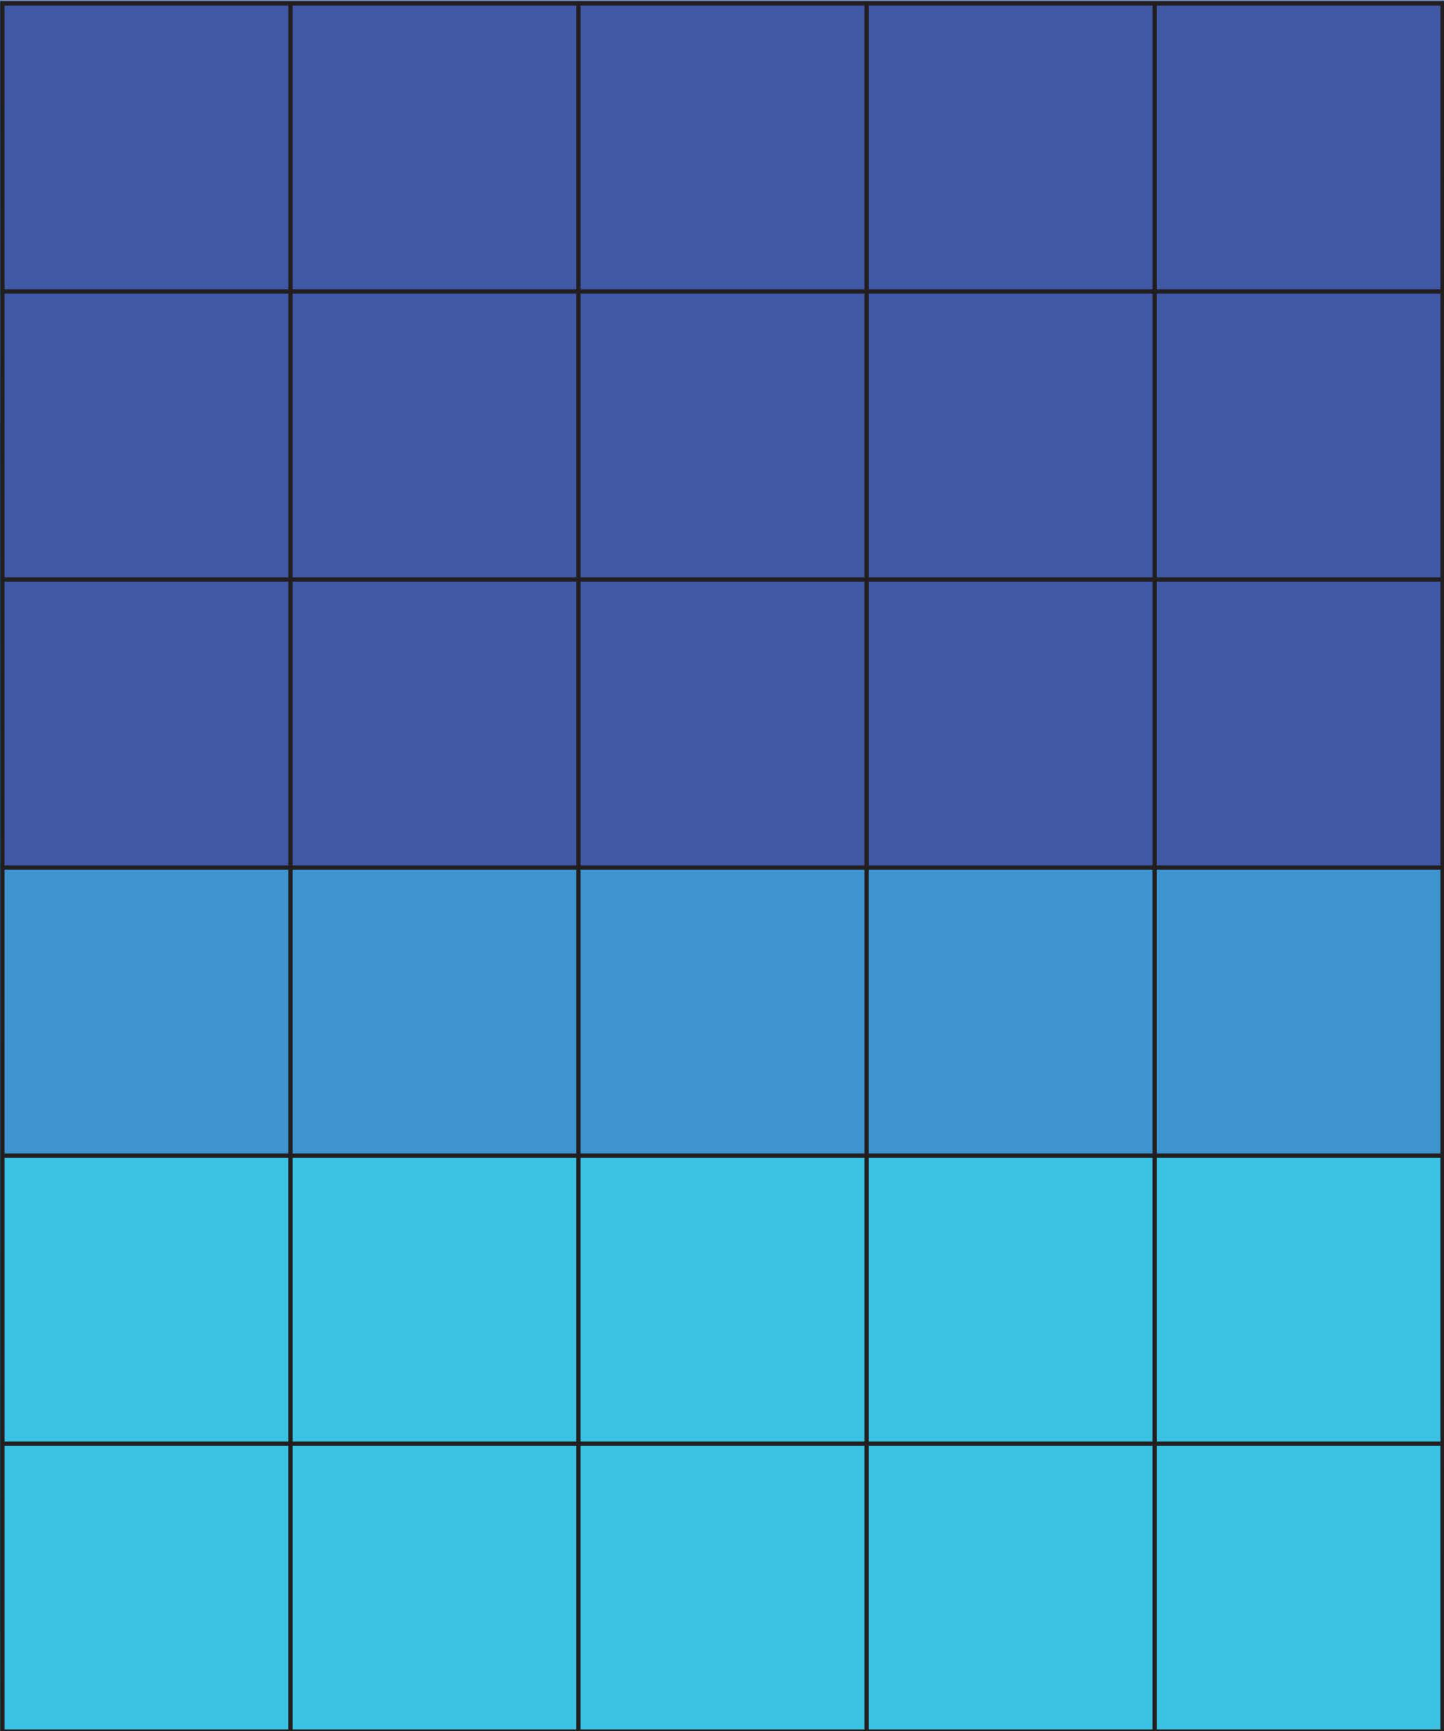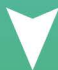

LAND (TOWARDS PLAYER)

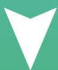

# THE RAMP

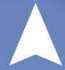

OPEN OCEAN

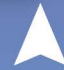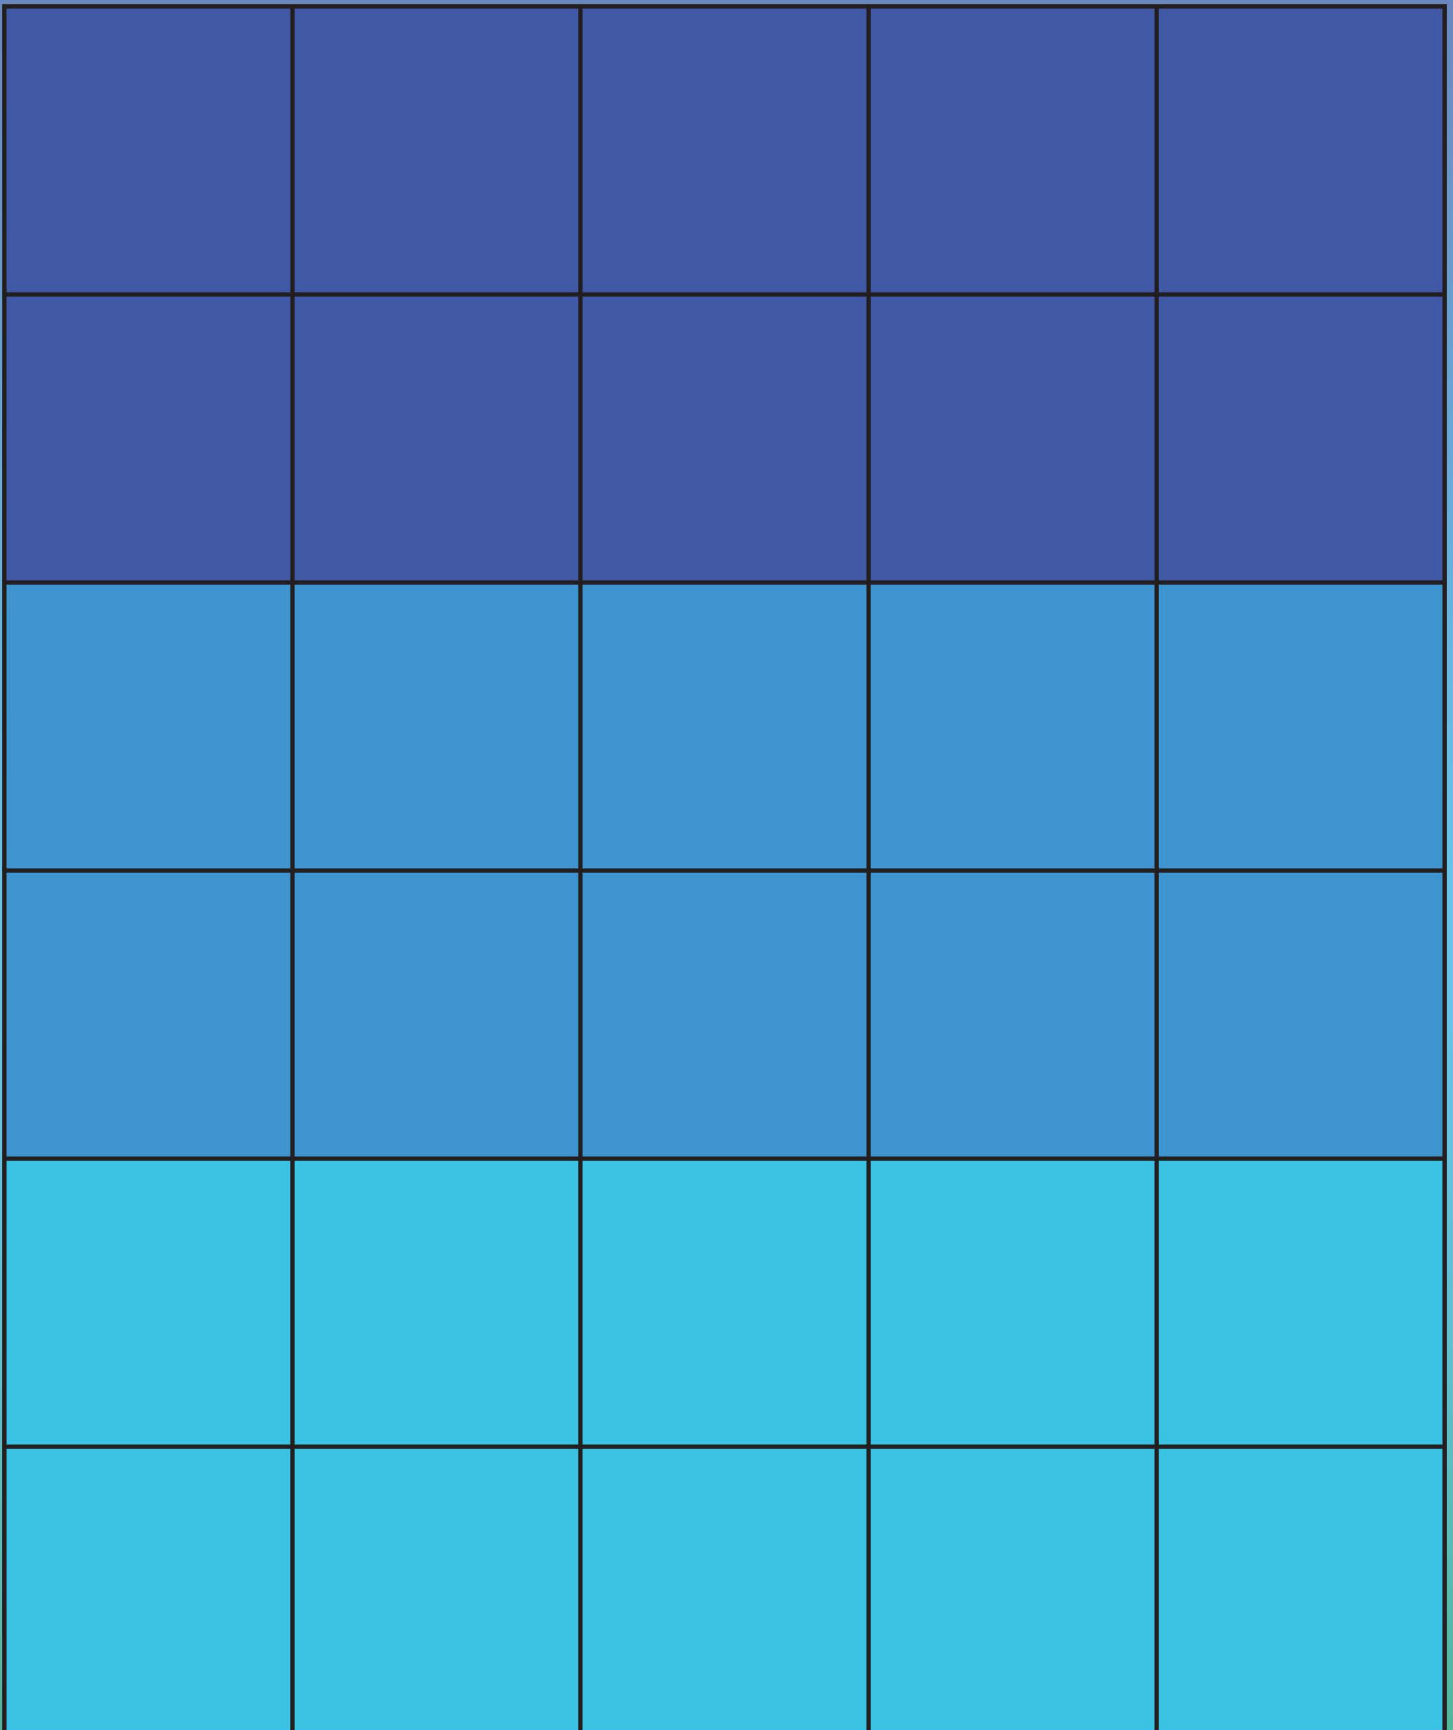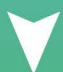

LAND (TOWARDS PLAYER)

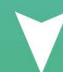

# THE BARRIER REEF

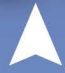

OPEN OCEAN

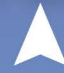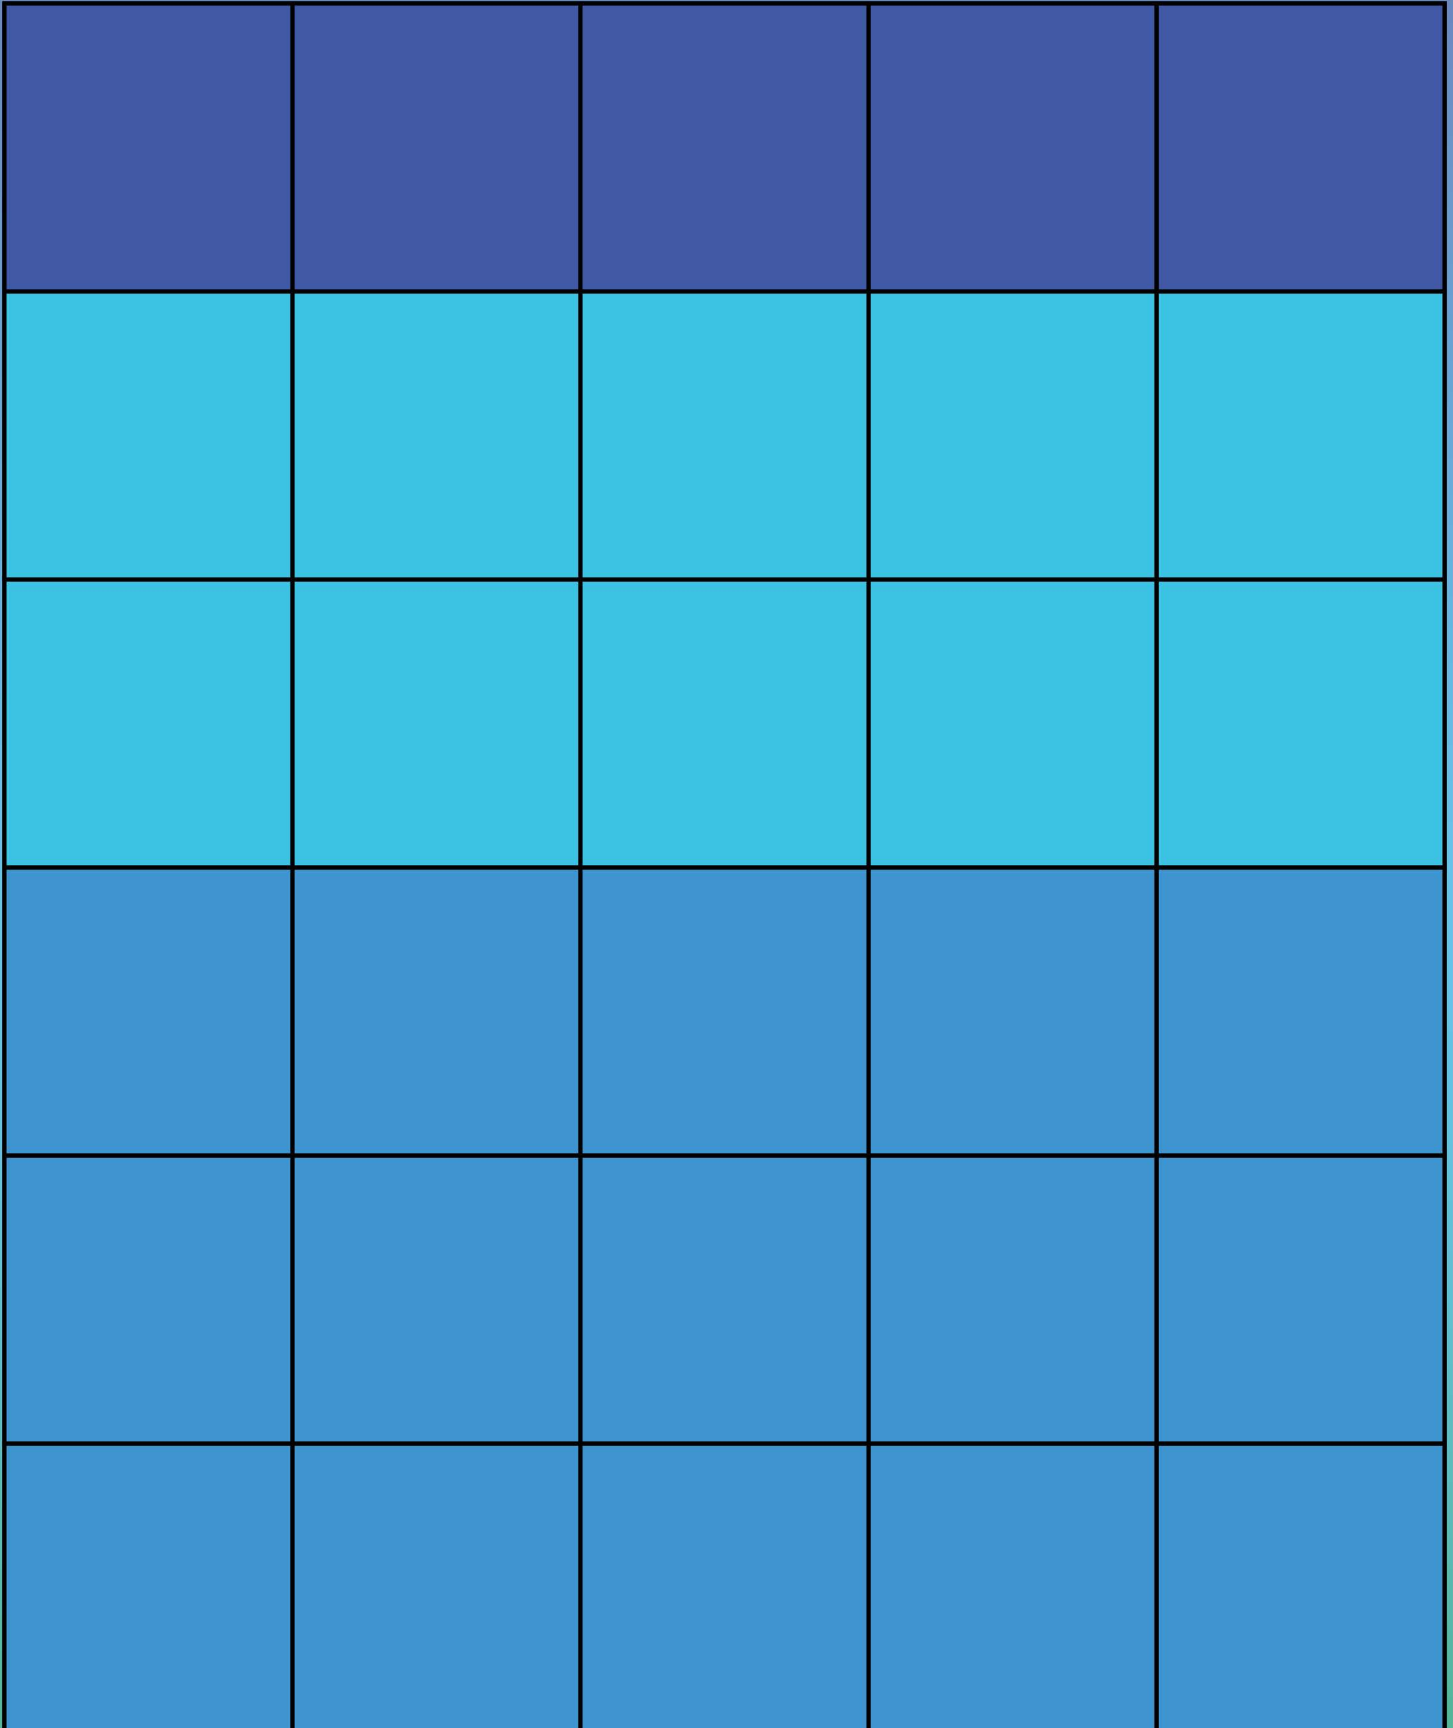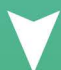

LAND (TOWARDS PLAYER)

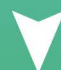

# THE PATCH REEF LAGOON

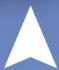

OPEN OCEAN

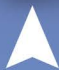

|  |  |  |  |  |
|--|--|--|--|--|
|  |  |  |  |  |
|  |  |  |  |  |
|  |  |  |  |  |
|  |  |  |  |  |
|  |  |  |  |  |
|  |  |  |  |  |

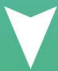

LAND (TOWARDS PLAYER)

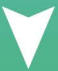

Supplement: Supplementary file 1 [file 1]
