# Supplementary material
Source: publisher figshare collection journal article supplement (https://tandf.figshare.com/articles/dataset/_/23596523)

***On cardstock, print out tokens (below) and cut them out***

***On cardstock, print out tokens (below) and cut them out***

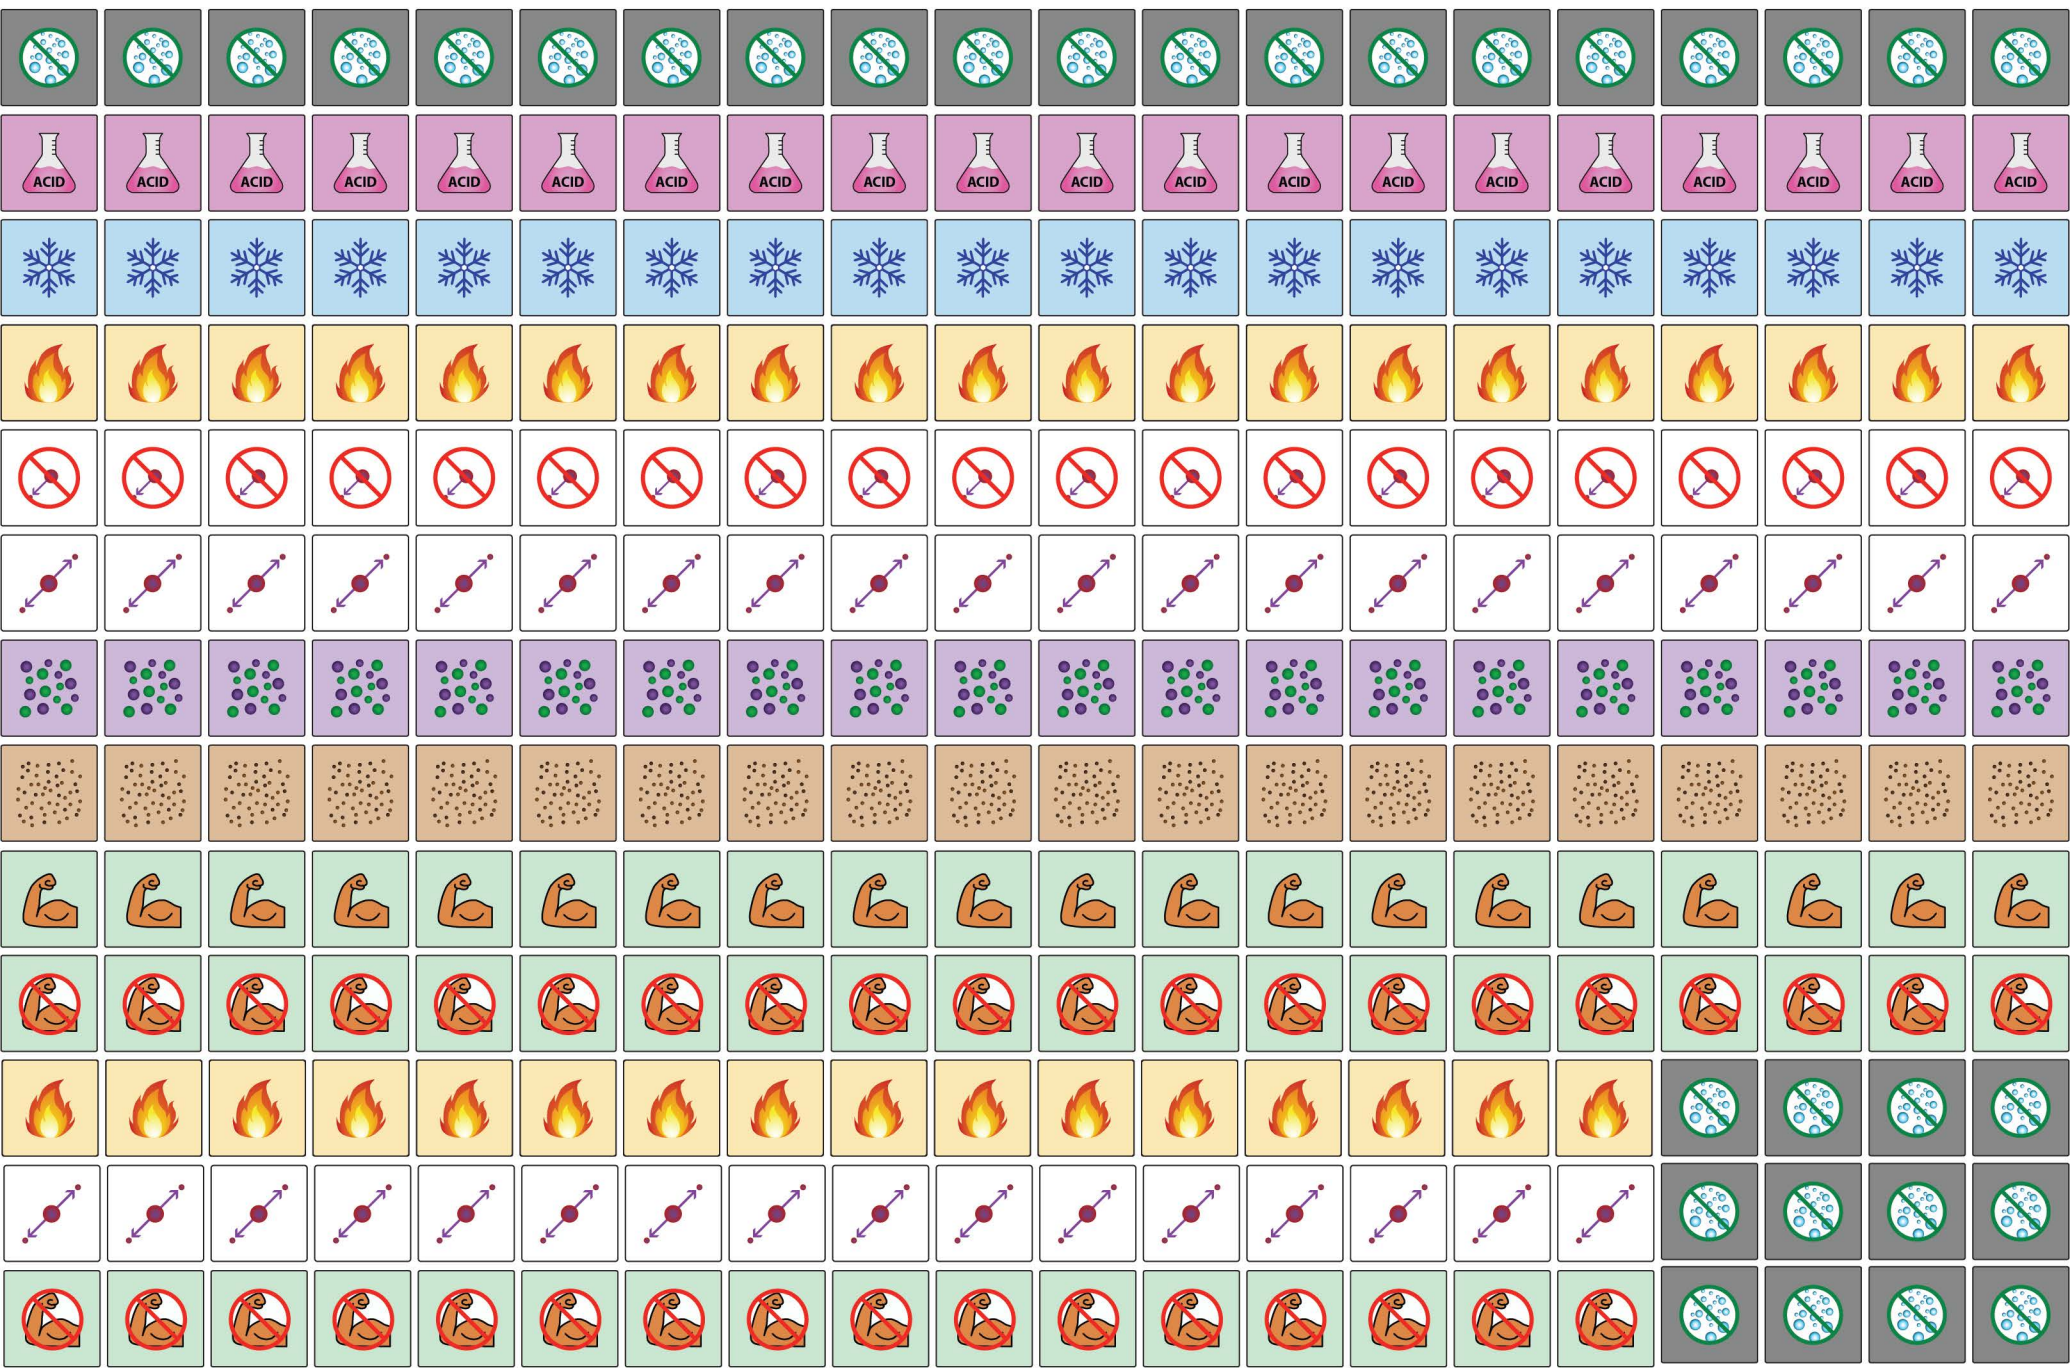



***On cardstock, print out tokens (below) and cut them out***

***On cardstock, print out tokens (below) and cut them out***





# Reef Survivor Mutations (print 3x)

*On cardstock, print out tokens (below) and cut them out*



Supplement: Supplementary file 2 [file 1]
