# Supplementary material
Source: publisher figshare collection journal article supplement (https://tandf.figshare.com/articles/dataset/_/23596523)
Supplement: Supplementary file 5 [file 1]

## **Introductory Videos for “Reef Survivor”**

- Parts of undergraduate lectures by Dr. Martindale, uploaded to the Texas Data Repository: doi: 10.18738/T8/S3KWT7.
  - Mechanisms of Evolution (10 mins; uploaded as an mp4)
  - Speciation (5 mins; uploaded as an mp4)
  - Measures of Diversity (120 mins; uploaded as an mp4)
- There is also a great EONS video: How Evolution Works (And How We Figured It Out) (11 mins) <https://youtu.be/dyiZaHIRM6w>
- For younger audiences, the Amoeba Sisters have nice videos about Genetic Drift ([www.youtube.com/watch?v=W0TM4LQmoZY](http://www.youtube.com/watch?v=W0TM4LQmoZY)) and Natural Selection (<https://youtu.be/7VM9YxmULuo>)!
- PBS Learning Media:
  - [What are corals?](#)
  - [Where are Coral Reefs Found?](#)
  - [What is Ecology?](#)
