# Supplementary material
Source: publisher figshare collection journal article supplement (https://tandf.figshare.com/articles/dataset/_/23596523)
Supplement: Supplementary file 7 [file 1]

| Semester | Timestamp           | Indicate your level of agreement with the following statement: "Reef Survivor' is a fun board game." | Indicate your level of agreement with the following statement: "The game rules were easy to understand." | Indicate your level of agreement with the following statement: "I learned something from playing this game" | Indicate your level of agreement with the following statement: "My knowledge of reef communities and evolution has improved due to playing this game." | Indicate your level of agreement with the following statement: "The pre-lab assignment helped me strategize/ play the game." | Indicate your level of agreement with the following statement: "Strategizing for this game helped me learn the material." | Indicate your level of agreement with the following statement: "Competing against others helped me learn the material" | Indicate your level of agreement with the following statement: " Collaborating with my peers in the game helped me learn the material" | Indicate your level of agreement with the following statement: "I would play this game outside of lab for fun (e.g., at a friend/family game night)." | Was the game well balanced in terms of education and enjoyment? | Compared to a typical class or lab, how much do you think you learned? | How long did the game take to play (for your group)? |
|----------|---------------------|------------------------------------------------------------------------------------------------------|----------------------------------------------------------------------------------------------------------|-------------------------------------------------------------------------------------------------------------|--------------------------------------------------------------------------------------------------------------------------------------------------------|------------------------------------------------------------------------------------------------------------------------------|---------------------------------------------------------------------------------------------------------------------------|------------------------------------------------------------------------------------------------------------------------|----------------------------------------------------------------------------------------------------------------------------------------|-------------------------------------------------------------------------------------------------------------------------------------------------------|-----------------------------------------------------------------|------------------------------------------------------------------------|------------------------------------------------------|
| F 22     | 10/22/2021 12:17:36 | Agree                                                                                                | Disagree                                                                                                 | Agree                                                                                                       | Strongly agree                                                                                                                                         | Strongly agree                                                                                                               | Strongly agree                                                                                                            | Strongly agree                                                                                                         | Agree                                                                                                                                  | Agree                                                                                                                                                 | Abit too much science                                           | About the same                                                         | More than 2.5 hours (>150 mins)                      |
| F 22     | 10/22/2021 12:21:23 | Agree                                                                                                | Neutral                                                                                                  | Agree                                                                                                       | Agree                                                                                                                                                  | Strongly agree                                                                                                               | Agree                                                                                                                     | Strongly agree                                                                                                         | Agree                                                                                                                                  | Agree                                                                                                                                                 | Perfect, I learned a lot and had fun                            | Abit less by playing the game                                          | About two hours and 15 minutes (~135 mins)           |
| F 22     | 10/22/2021 15:34:45 | Agree                                                                                                | Neutral                                                                                                  | Agree                                                                                                       | Agree                                                                                                                                                  | Agree                                                                                                                        | Agree                                                                                                                     | Neutral                                                                                                                | Agree                                                                                                                                  | Strongly agree                                                                                                                                        | Perfect, I learned a lot and had fun                            | About the same                                                         | About two and a half hours (~150 mins)               |
| F 22     | 10/24/2021 15:15:29 | Agree                                                                                                | Agree                                                                                                    | Agree                                                                                                       | Agree                                                                                                                                                  | Agree                                                                                                                        | Agree                                                                                                                     | Agree                                                                                                                  | Agree                                                                                                                                  | Neutral                                                                                                                                               | Abit too much science                                           | Abit more by playing the game                                          | More than 2.5 hours (>150 mins)                      |
| F 22     | 10/24/2021 17:19:21 | Agree                                                                                                | Disagree                                                                                                 | Neutral                                                                                                     | Neutral                                                                                                                                                | Strongly agree                                                                                                               | Neutral                                                                                                                   | Neutral                                                                                                                | Agree                                                                                                                                  | Strongly agree                                                                                                                                        | Perfect, I learned a lot and had fun                            | Abit less by playing the game                                          | More than 2.5 hours (>150 mins)                      |
| F 22     | 10/24/2021 20:28:01 | Agree                                                                                                | Neutral                                                                                                  | Agree                                                                                                       | Strongly agree                                                                                                                                         | Agree                                                                                                                        | Agree                                                                                                                     | Disagree                                                                                                               | Agree                                                                                                                                  | Agree                                                                                                                                                 | Perfect, I learned a lot and had fun                            | Abit more by playing the game                                          | About 2 hours (~120 mins)                            |
| F 22     | 10/25/2021 10:33:30 | Neutral                                                                                              | Disagree                                                                                                 | Neutral                                                                                                     | Neutral                                                                                                                                                | Disagree                                                                                                                     | Agree                                                                                                                     | Disagree                                                                                                               | Strongly Agree                                                                                                                         | Neutral                                                                                                                                               | Abit too much science                                           | Abit more by playing the game                                          | About 2 hours (~120 mins)                            |
| F 22     | 10/27/2021 2:01:26  | Agree                                                                                                | Neutral                                                                                                  | Agree                                                                                                       | Agree                                                                                                                                                  | Agree                                                                                                                        | Agree                                                                                                                     | Agree                                                                                                                  | Agree                                                                                                                                  | Agree                                                                                                                                                 | Perfect, I learned a lot and had fun                            | Abit more by playing the game                                          | About 2 hours (~120 mins)                            |
| F 22     |                     |                                                                                                      |                                                                                                          |                                                                                                             |                                                                                                                                                        |                                                                                                                              |                                                                                                                           |                                                                                                                        |                                                                                                                                        |                                                                                                                                                       |                                                                 |                                                                        |                                                      |
| F 22     |                     |                                                                                                      |                                                                                                          |                                                                                                             |                                                                                                                                                        |                                                                                                                              |                                                                                                                           |                                                                                                                        |                                                                                                                                        |                                                                                                                                                       |                                                                 |                                                                        |                                                      |
| F 22     |                     |                                                                                                      |                                                                                                          |                                                                                                             |                                                                                                                                                        |                                                                                                                              |                                                                                                                           |                                                                                                                        |                                                                                                                                        |                                                                                                                                                       |                                                                 |                                                                        |                                                      |
| F 22     |                     |                                                                                                      |                                                                                                          |                                                                                                             |                                                                                                                                                        |                                                                                                                              |                                                                                                                           |                                                                                                                        |                                                                                                                                        |                                                                                                                                                       |                                                                 |                                                                        |                                                      |
| F 22     |                     |                                                                                                      |                                                                                                          |                                                                                                             |                                                                                                                                                        |                                                                                                                              |                                                                                                                           |                                                                                                                        |                                                                                                                                        |                                                                                                                                                       |                                                                 |                                                                        |                                                      |
| F 22     | 11/17/2021 10:07:40 | Agree                                                                                                | Agree                                                                                                    | Strongly Agree                                                                                              | Agree                                                                                                                                                  | Agree                                                                                                                        | Agree                                                                                                                     | Agree                                                                                                                  | Agree                                                                                                                                  | Neutral                                                                                                                                               | Abit too much science                                           | Abit more by playing the game                                          | About 2 hours (~120 mins)                            |

|      |                     |                |                   |                |                |                |                |                   |                |                |                                      |                                        |                                                     |
|------|---------------------|----------------|-------------------|----------------|----------------|----------------|----------------|-------------------|----------------|----------------|--------------------------------------|----------------------------------------|-----------------------------------------------------|
| F 22 | 11/9/2021 16:58:03  | Neutral        | Agree             | Agree          | Agree          | Neutral        | Neutral        | Neutral           | Neutral        | Disagree       | Abit too much science                | Abit less by playing the game          | About an hour and 15 minutes (~75 mins)             |
| F 22 | 11/9/2021 16:58:33  | Agree          | Neutral           | Agree          | Agree          | Agree          | Neutral        | Agree             | Agree          | Agree          | Perfect, I learned a lot and had fun | About the same                         | About two hours and 15 minutes (~135 mins)          |
| F 22 | 11/9/2021 17:38:17  | Strongly Agree | Strongly Agree    | Strongly Agree | Strongly agree | Agree          | Strongly agree | Agree             | Strongly Agree | Agree          | Abit more science would be good      | Abit more by playing the game          | About an hour and a half (~90 mins)                 |
| F 22 | 11/9/2021 19:14:48  | Agree          | Neutral           | Strongly Agree | Strongly agree | Neutral        | Neutral        | Agree             | Agree          | Neutral        | Perfect, I learned a lot and had fun | Abit more by playing the game          | About an hour and 45 minutes (~105 mins)            |
| F 22 | 11/10/2021 8:29:04  | Agree          | Disagree          | Agree          | Neutral        | Disagree       | Agree          | Agree             | Agree          | Disagree       | Perfect, I learned a lot and had fun | Abit less by playing the game          | About 2 hours (~120 mins)                           |
| F 22 | 11/11/2021 20:50:51 | Agree          | Neutral           | Strongly Agree | Agree          | Agree          | Neutral        | Neutral           | Agree          | Disagree       | Abit more science would be good      | About the same                         | About 2 hours (~120 mins)                           |
| F 22 | 11/14/2021 11:09:13 | Strongly Agree | Strongly Agree    | Agree          | Agree          | Neutral        | Agree          | Neutral           | Agree          | Strongly agree | Perfect, I learned a lot and had fun | About the same                         | About 2 hours (~120 mins)                           |
| F 22 | 11/15/2021 18:56:44 | Agree          | Neutral           | Agree          | Agree          | Agree          | Agree          | Agree             | Strongly Agree | Agree          | Perfect, I learned a lot and had fun | About the same                         | About 2 hours (~120 mins)                           |
| F 22 | 11/15/2021 19:41:45 | Agree          | Disagree          | Agree          | Agree          | Disagree       | Disagree       | Agree             | Agree          | Disagree       | Perfect, I learned a lot and had fun | Abit less by playing the game          | About 2 hours (~120 mins)                           |
| F 22 | 11/16/2021 17:27:50 | Neutral        | Disagree          | Agree          | Agree          | Disagree       | Agree          | Disagree          | Agree          | Disagree       | Abit too much science                | Abit more by playing the game          | I do not remember, honestly. Over an hour for sure. |
| F 22 | 11/11/2021 2:04:24  | Agree          | Strongly Disagree | Strongly Agree | Neutral        | Strongly agree | Strongly agree | Neutral           | Strongly Agree | Agree          | Abit more science would be good      | Significantly less by playing the game | About two and a half hours (~150 mins)              |
| F 22 | 11/11/2021 9:21:18  | Agree          | Disagree          | Agree          | Agree          | Disagree       | Neutral        | Strongly disagree | Neutral        | Neutral        | Abit more science would be good      | Abit less by playing the game          | We didn't finish in the 2 hour lab time (>120 mins) |
| F 22 | 12/10/2021 12:42:25 | Strongly Agree | Neutral           | Agree          | Agree          | Strongly agree | Agree          | Agree             | Strongly Agree | Strongly agree | Abit more science would be good      | About the same                         | About 2 hours (~120 mins)                           |
| F 22 | 12/10/2021 13:19:04 | Neutral        | Disagree          | Agree          | Agree          | Agree          | Agree          | Agree             | Agree          | Disagree       | Perfect, I learned a lot and had fun | Abit more by playing the game          | More than 2.5 hours (>150 mins)                     |
| F 22 | 12/10/2021 14:11:18 | Agree          | Neutral           | Neutral        | Neutral        | Agree          | Neutral        | Neutral           | Neutral        | Agree          | Abit more science would be good      | Abit less by playing the game          | About two and a half hours (~150 mins)              |
| F 22 | 12/10/2021 14:20:34 | Agree          | Agree             | Strongly Agree | Strongly agree | Agree          | Agree          | Strongly agree    | Strongly Agree | Neutral        | Perfect, I learned a lot and had fun | Significantly more by playing the game | About 2 hours (~120 mins)                           |

|      |                     |                |                   |                |                |                |                |          |                |                   |                                      |                                        |                                            |
|------|---------------------|----------------|-------------------|----------------|----------------|----------------|----------------|----------|----------------|-------------------|--------------------------------------|----------------------------------------|--------------------------------------------|
| F 22 | 12/10/2021 16:02:00 | Agree          | Agree             | Strongly Agree | Strongly agree | Agree          | Strongly agree | Neutral  | Strongly Agree | Agree             | Perfect, I learned a lot and had fun | Significantly more by playing the game | About 2 hours (~120 mins)                  |
| F 22 | 12/10/2021 22:07:44 | Agree          | Agree             | Agree          | Agree          | Strongly agree | Strongly agree | Agree    | Strongly Agree | Agree             | Perfect, I learned a lot and had fun | A bit more by playing the game         | About two and a half hours (~150 mins)     |
| F 22 | 12/12/2021 14:24:13 | Agree          | Neutral           | Agree          | Strongly agree | Strongly agree | Agree          | Neutral  | Agree          | Agree             | A bit too much science               | About the same                         | About an hour and 45 minutes (~105 mins)   |
| F 22 | 12/12/2021 16:45:22 | Agree          | Neutral           | Neutral        | Disagree       | Disagree       | Neutral        | Disagree | Agree          | Agree             | Perfect, I learned a lot and had fun | A bit less by playing the game         | About two and a half hours (~150 mins)     |
| F 22 |                     |                |                   |                |                |                |                |          |                |                   |                                      |                                        |                                            |
| F 22 | 10/27/2021 20:33:15 | Neutral        | Disagree          | Disagree       | Disagree       | Disagree       | Neutral        | Disagree | Disagree       | Agree             | A bit more science would be good     | Significantly less by playing the game | About an hour and a half (~90 mins)        |
| F 22 | 10/28/2021 0:35:05  | Strongly Agree | Disagree          | Strongly Agree | Agree          | Agree          | Agree          | Neutral  | Agree          | Neutral           | Not enough science                   | Significantly more by playing the game | About an hour (~60 mins)                   |
| F 22 | 12/15/2021 5:41:33  | Agree          | Strongly Disagree | Agree          | Agree          | Agree          | Neutral        | Agree    | Agree          | Strongly disagree | A bit too much science               | About the same                         | About an hour and 15 minutes (~75 mins)    |
| F 22 |                     |                |                   |                |                |                |                |          |                |                   |                                      |                                        |                                            |
| F 22 |                     |                |                   |                |                |                |                |          |                |                   |                                      |                                        |                                            |
| F 22 |                     |                |                   |                |                |                |                |          |                |                   |                                      |                                        |                                            |
| F 22 |                     |                |                   |                |                |                |                |          |                |                   |                                      |                                        |                                            |
| F 22 |                     |                |                   |                |                |                |                |          |                |                   |                                      |                                        |                                            |
| F 22 |                     |                |                   |                |                |                |                |          |                |                   |                                      |                                        |                                            |
| F 22 | 10/16/2021 16:14:20 | Agree          | Neutral           | Agree          | Agree          | Strongly agree | Agree          | Neutral  | Agree          | Agree             | A bit more science would be good     | A bit less by playing the game         | About an hour (~60 mins)                   |
| F 22 | 10/18/2021 12:16:19 | Agree          | Disagree          | Agree          | Agree          | Agree          | Agree          | Agree    | Agree          | Neutral           | Perfect, I learned a lot and had fun | About the same                         | About 2 hours (~120 mins)                  |
| F 22 | 10/18/2021 20:23:08 | Strongly Agree | Neutral           | Agree          | Agree          | Neutral        | Strongly agree | Agree    | Agree          | Agree             | Perfect, I learned a lot and had fun | About the same                         | About two hours and 15 minutes (~135 mins) |

|      |                     |                |          |                |                       |                   |          |                |                |                   |                                      |                                                |                                                                   |
|------|---------------------|----------------|----------|----------------|-----------------------|-------------------|----------|----------------|----------------|-------------------|--------------------------------------|------------------------------------------------|-------------------------------------------------------------------|
| F 22 | 10/18/2021 22:55:51 | Agree          | Disagree | Strongly Agree | Agree                 | Neutral           | Agree    | Neutral        | Agree          | Disagree          | Perfect, I learned a lot and had fun | About the same                                 | About an hour and a half (~90 mins)                               |
| F 22 | 10/19/2021 9:33:56  | Agree          | Neutral  | Agree          | Agree                 | Neutral           | Neutral  | Agree          | Agree          | Disagree          | A bit too much science               | A bit more by playing the game                 | About 2 hours (~120 mins)                                         |
| F 22 | 10/19/2021 10:20:02 | Agree          | Neutral  | Agree          | Agree                 | Neutral           | Agree    | Agree          | Agree          | Neutral           | Perfect, I learned a lot and had fun | Significantly more by playing the game         | About 2 hours (~120 mins)                                         |
| F 22 | 10/19/2021 10:29:17 | Neutral        | Neutral  | Disagree       | Strongly agree        | Strongly disagree | Disagree | Strongly agree | Neutral        | Neutral           | A bit more science would be good     | A bit less by playing the game                 | About an hour and 45 minutes (~105 mins)                          |
| F 22 | 10/19/2021 10:48:04 | Agree          | Agree    | Agree          | Agree                 | Agree             | Agree    | Agree          | Agree          | Agree             | Perfect, I learned a lot and had fun | A bit less by playing the game                 | More than 2.5 hours (>150 mins)                                   |
| F 22 | 10/19/2021 12:41:25 | Agree          | Agree    | Strongly Agree | Agree                 | Neutral           | Neutral  | Agree          | Strongly Agree | Neutral           | Perfect, I learned a lot and had fun | A bit more by playing the game                 | About an hour and a half (~90 mins)                               |
| F 22 | 10/19/2021 21:25:54 | Strongly Agree | Disagree | Agree          | Agree                 | Neutral           | Agree    | Strongly agree | Strongly Agree | Strongly agree    | Perfect, I learned a lot and had fun | About the same                                 | About two and a half hours (~150 mins)                            |
| F 22 |                     |                |          |                |                       |                   |          |                |                |                   |                                      |                                                |                                                                   |
| F 22 |                     |                |          |                |                       |                   |          |                |                |                   |                                      |                                                |                                                                   |
| F 22 |                     |                |          |                |                       |                   |          |                |                |                   |                                      |                                                |                                                                   |
| F 22 |                     |                |          |                |                       |                   |          |                |                |                   |                                      |                                                |                                                                   |
| F 22 |                     |                |          |                |                       |                   |          |                |                |                   |                                      |                                                |                                                                   |
| F 22 | 11/3/2021 16:36:43  | Disagree       | Disagree | Agree          | Agree, Strongly agree | Strongly disagree | Neutral  | Disagree       | Agree          | Strongly disagree | A bit too much science               | A bit less by playing the game, About the same | About two and a half hours (~150 mins), About 2 hours (~120 mins) |
| F 22 | 11/4/2021 0:04:35   | Neutral        | Disagree | Strongly Agree | Neutral               | Neutral           | Neutral  | Neutral        | Agree          | Disagree          | A bit too much science               | A bit less by playing the game                 | About an hour and a half (~90 mins)                               |

|      |                     |                |          |                |                |                |                |                |                |                   |                                                              |                                                |                                                                             |
|------|---------------------|----------------|----------|----------------|----------------|----------------|----------------|----------------|----------------|-------------------|--------------------------------------------------------------|------------------------------------------------|-----------------------------------------------------------------------------|
| F 22 | 11/4/2021 17:09:39  | Agree          | Disagree | Neutral        | Agree          | Disagree       | Neutral        | Neutral        | Agree          | Disagree          | Perfect, I learned a lot and had fun                         | About the same                                 | About an hour and a half (~90 mins)                                         |
| F 22 | 11/5/2021 19:50:39  | Agree          | Disagree | Agree          | Agree, Neutral | Disagree       | Agree          | Neutral, Agree | Agree          | Disagree          | A bit too much science, Perfect, I learned a lot and had fun | A bit less by playing the game, About the same | About two hours and 15 minutes (~135 mins), More than 2.5 hours (>150 mins) |
| F 22 | 11/6/2021 15:10:22  | Neutral        | Disagree | Strongly Agree | Strongly agree | Neutral        | Neutral        | Disagree       | Disagree       | Disagree          | A bit too much science                                       | A bit less by playing the game                 | About an hour and 45 minutes (~105 mins)                                    |
| F 22 | 11/8/2021 2:35:29   | Agree          | Neutral  | Agree          | Strongly agree | Disagree       | Agree          | Strongly agree | Strongly Agree | Agree             | Perfect, I learned a lot and had fun                         | About the same                                 | About 2 hours (~120 mins)                                                   |
| F 22 | 11/8/2021 11:20:26  | Neutral        | Neutral  | Agree          | Agree          | Neutral        | Agree          | Agree          | Neutral        | Neutral           | A bit more science would be good                             | A bit less by playing the game                 | About an hour and a half (~90 mins)                                         |
| F 22 | 11/10/2021 17:02:24 | Agree          | Disagree | Neutral        | Agree          | Disagree       | Disagree       | Disagree       | Disagree       | Agree             | Perfect, I learned a lot and had fun                         | About the same                                 | About 2 hours (~120 mins)                                                   |
| F 22 | 10/4/2021 15:48:58  | Strongly Agree | Agree    | Strongly Agree | Strongly agree | Strongly agree | Strongly agree | Strongly agree | Strongly Agree | Neutral           | Way too much science                                         | About the same                                 | About 2 hours (~120 mins)                                                   |
| F 22 | 10/5/2021 11:01:21  | Strongly Agree | Agree    | Strongly Agree | Strongly agree | Agree          | Strongly agree | Strongly agree | Strongly Agree | Strongly agree    | Perfect, I learned a lot and had fun                         | Significantly more by playing the game         | About an hour and 15 minutes (~75 mins)                                     |
| F 22 | 10/6/2021 12:01:14  | Neutral        | Neutral  | Agree          | Agree          | Agree          | Agree          | Neutral        | Neutral        | Disagree          | A bit too much science                                       | A bit more by playing the game                 | About an hour (~60 mins)                                                    |
| F 22 | 10/6/2021 12:46:09  | Agree          | Neutral  | Agree          | Neutral        | Disagree       | Agree          | Agree          | Agree          | Disagree          | A bit too much science                                       | A bit less by playing the game                 | About an hour (~60 mins)                                                    |
| F 22 | 10/6/2021 13:28:39  | Neutral        | Disagree | Agree          | Neutral        | Neutral        | Neutral        | Disagree       | Agree          | Neutral           | A bit too much science                                       | A bit more by playing the game                 | About an hour and a half (~90 mins)                                         |
| F 22 | 11/18/2021 13:42:58 | Neutral        | Disagree | Agree          | Agree          | Neutral        | Agree          | Agree          | Neutral        | Agree             | A bit too much science                                       | A bit more by playing the game                 | Less than 1 hour (<60 mins)                                                 |
| F 22 | 11/18/2021 23:46:33 | Agree          | Agree    | Agree          | Strongly agree | Agree          | Neutral        | Neutral        | Strongly Agree | Neutral           | Perfect, I learned a lot and had fun                         | A bit more by playing the game                 | About an hour and a half (~90 mins)                                         |
| F 22 | 11/19/2021 15:52:23 | Disagree       | Disagree | Neutral        | Disagree       | Strongly agree | Disagree       | Neutral        | Agree          | Strongly disagree | A bit too much science                                       | A bit less by playing the game                 | About an hour (~60 mins)                                                    |

[illegible]

[illegible]

|      |                     |                |          |                |                |                   |                |                |                |                   |                                      |                                        |                                                     |
|------|---------------------|----------------|----------|----------------|----------------|-------------------|----------------|----------------|----------------|-------------------|--------------------------------------|----------------------------------------|-----------------------------------------------------|
| F 22 |                     |                |          |                |                |                   |                |                |                |                   |                                      |                                        |                                                     |
| F 22 |                     |                |          |                |                |                   |                |                |                |                   |                                      |                                        |                                                     |
| F 22 |                     |                |          |                |                |                   |                |                |                |                   |                                      |                                        |                                                     |
| F 22 |                     |                |          |                |                |                   |                |                |                |                   |                                      |                                        |                                                     |
| F 22 |                     |                |          |                |                |                   |                |                |                |                   |                                      |                                        |                                                     |
| F 22 | 10/18/2021 11:22:30 | Agree          | Neutral  | Agree          | Agree          | Neutral           | Agree          | Neutral        | Agree          | Agree             | Perfect, I learned a lot and had fun | A bit more by playing the game         | About 2 hours (~120 mins)                           |
| F 22 | 10/18/2021 11:22:36 | Agree          | Disagree | Agree          | Neutral        | Disagree          | Strongly agree | Agree          | Agree          | Neutral           | A bit more science would be good     | A bit more by playing the game         | About 2 hours (~120 mins)                           |
| F 22 | 10/18/2021 12:07:30 | Strongly Agree | Neutral  | Strongly Agree | Strongly agree | Agree             | Agree          | Strongly agree | Agree          | Agree             | A bit too much science               | A bit more by playing the game         | About 2 hours (~120 mins)                           |
| F 22 | 10/18/2021 12:10:09 | Disagree       | Neutral  | Neutral        | Agree          | Strongly disagree | Disagree       | Neutral        | Neutral        | Strongly disagree | Way too much science                 | Significantly less by playing the game | We didn't finish in the 2 hour lab time (>120 mins) |
| F 22 | 10/18/2021 12:40:20 | Agree          | Disagree | Neutral        | Agree          | Neutral           | Agree          | Disagree       | Strongly Agree | Disagree          | A bit too much science               | About the same                         |                                                     |
| F 22 | 10/18/2021 17:26:38 | Neutral        | Disagree | Disagree       | Neutral        | Neutral           | Agree          | Disagree       | Disagree       | Strongly disagree | A bit too much science               | Significantly less by playing the game | We didn't finish in the 2 hour lab time (>120 mins) |
| F 22 | 10/18/2021 17:41:01 | Strongly Agree | Agree    | Neutral        | Neutral        | Agree             | Neutral        | Neutral        | Agree          | Agree             | Perfect, I learned a lot and had fun | A bit more by playing the game         | About 2 hours (~120 mins)                           |
| F 22 | 10/19/2021 15:31:20 | Agree          | Neutral  | Strongly Agree | Agree          | Neutral           | Agree          | Agree          | Agree          | Disagree          | A bit too much science               | Significantly more by playing the game | About 2 hours (~120 mins)                           |



|      |                     |                   |                |                |                |                   |                |                |                |                   |                                      |                                        |                                                             |
|------|---------------------|-------------------|----------------|----------------|----------------|-------------------|----------------|----------------|----------------|-------------------|--------------------------------------|----------------------------------------|-------------------------------------------------------------|
| F 22 | 10/20/2021 15:05:51 | Neutral           | Disagree       | Disagree       | Neutral        | Neutral           | Neutral        | Agree          | Agree          | Disagree          | Abit too much science                | Abit less by playing the game          | More than 2.5 hours (>150 mins)                             |
| F 22 | 10/18/2021 12:23:08 | Agree             | Neutral        | Strongly Agree | Strongly agree | Agree             | Agree          | Strongly agree | Strongly Agree | Agree             | Perfect, I learned a lot and had fun | Abit more by playing the game          | It took my group 2.5 hours to get through 3 rounds of play. |
| F 22 | 10/20/2021 22:30:19 | Strongly Agree    | Strongly Agree | Strongly Agree | Strongly agree | Strongly agree    | Strongly agree | Strongly agree | Strongly Agree | Strongly agree    | Perfect, I learned a lot and had fun | Abit more by playing the game          | About two hours and 15 minutes (~135 mins)                  |
| F 22 |                     |                   |                |                |                |                   |                |                |                |                   |                                      |                                        |                                                             |
| F 22 | 10/21/2021 16:03:46 | Agree             | Agree          | Agree          | Agree          | Agree             | Agree          | Agree          | Agree          | Agree             | Perfect, I learned a lot and had fun | About the same                         | About an hour and a half (~90 mins)                         |
| F 22 | 10/27/2021 11:57:52 | Strongly Disagree | Agree          | Neutral        | Disagree       | Strongly disagree | Disagree       | Disagree       | Disagree       | Strongly disagree | Abit too much science                | Significantly less by playing the game | About an hour (~60 mins)                                    |
| F 22 | 10/27/2021 12:04:22 | Neutral           | Neutral        | Agree          | Neutral        | Neutral           | Disagree       | Neutral        | Neutral        | Strongly disagree | Not enough science                   | Abit less by playing the game          | About an hour (~60 mins)                                    |

|      |                     |                |          |          |                |          |          |                   |                |                |                                      |                                                               |                                                                                    |
|------|---------------------|----------------|----------|----------|----------------|----------|----------|-------------------|----------------|----------------|--------------------------------------|---------------------------------------------------------------|------------------------------------------------------------------------------------|
| F 22 | 10/27/2021 14:01:22 | Agree          | Disagree | Agree    | Strongly agree | Disagree | Disagree | Agree             | Agree          | Disagree       | Abit more science would be good      | About the same                                                | About an hour and a half (~90 mins)                                                |
| F 22 | 10/27/2021 15:26:43 | Strongly Agree | Agree    | Agree    | Neutral        | Disagree | Agree    | Agree             | Agree          | Strongly agree | Abit more science would be good      | About the same                                                | About an hour and 15 minutes (~75 mins)                                            |
| F 22 | 10/27/2021 20:14:26 | Strongly Agree | Neutral  | Agree    | Agree          | Neutral  | Disagree | Neutral           | Neutral        | Agree          | Perfect, I learned a lot and had fun | About the same                                                | About 2 hours (~120 mins)                                                          |
| F 22 | 11/2/2021 8:00:25   | Strongly Agree | Agree    | Agree    | Agree          | Neutral  | Agree    | Neutral           | Strongly Agree | Agree          | Abit more science would be good      | About the same                                                | About an hour and a half (~90 mins)                                                |
| F 22 | 11/2/2021 18:39:28  | Agree          | Neutral  | Agree    | Agree          | Neutral  | Neutral  | Agree             | Agree          | Strongly agree | Perfect, I learned a lot and had fun | Abit more by playing the game                                 | About an hour and 45 minutes (~105 mins)                                           |
| F 22 | 11/3/2021 11:57:45  | Neutral        | Disagree | Disagree | Neutral        | Agree    | Neutral  | Strongly disagree | Agree          | Disagree       | Not enough science                   | Significantly less by playing the game                        |                                                                                    |
| F 22 | 11/4/2021 0:15:48   | Agree          | Disagree | Agree    | Agree          | Neutral  | Agree    | Agree             | Agree          | Neutral        | Abit more science would be good      | Abit less by playing the game, A bit more by playing the game | About two hours and 15 minutes (~135 mins), About two and a half hours (~150 mins) |
| F 22 | 11/5/2021 10:53:10  | Agree          | Neutral  | Agree    | Strongly agree | Agree    | Agree    | Strongly agree    | Agree          | Strongly agree | Perfect, I learned a lot and had fun | Significantly more by playing the game                        | About an hour and a half (~90 mins)                                                |
| F 22 | 11/8/2021 16:41:44  | Strongly Agree | Agree    | Neutral  | Agree          | Neutral  | Disagree | Disagree          | Agree          | Agree          | Abit more science would be good      | About the same                                                | About an hour and 15 minutes (~75 mins)                                            |
| F 22 | 12/7/2021 18:03:39  | Disagree       | Disagree | Agree    | Strongly agree | Neutral  | Neutral  | Agree             | Strongly Agree | Disagree       | Abit too much science                | About the same                                                | About an hour and a half (~90 mins)                                                |

[illegible]

|      |                     |         |                   |                |                |                |                |                |                |                |                                      |                               |                                          |
|------|---------------------|---------|-------------------|----------------|----------------|----------------|----------------|----------------|----------------|----------------|--------------------------------------|-------------------------------|------------------------------------------|
| F 22 |                     |         |                   |                |                |                |                |                |                |                |                                      |                               |                                          |
| F 22 |                     |         |                   |                |                |                |                |                |                |                |                                      |                               |                                          |
| F 22 | 12/7/2021 1:14:07   | Neutral | Strongly Agree    | Strongly Agree | Strongly agree | Strongly agree | Agree          | Agree          | Agree          | Neutral        | Abit more science would be good      | Abit less by playing the game | About an hour (~60 mins)                 |
| F 22 | 12/7/2021 10:37:25  | Agree   | Neutral           | Agree          | Agree          | Agree          | Neutral        | Agree          | Agree          | Neutral        | Perfect, I learned a lot and had fun | About the same                | About an hour and 45 minutes (~105 mins) |
| F 22 | 12/9/2021 13:25:59  | Agree   | Disagree          | Agree          | Neutral        | Agree          | Neutral        | Neutral        | Strongly Agree | Agree          | Abit too much science                | Abit less by playing the game | About an hour and a half (~90 mins)      |
| F 22 | 12/9/2021 18:29:00  | Agree   | Strongly Disagree | Agree          | Agree          | Agree          | Strongly agree | Neutral        | Strongly Agree | Agree          | Abit too much science                | About the same                | About 2 hours (~120 mins)                |
| F 22 | 12/10/2021 13:10:58 | Agree   | Disagree          | Strongly Agree | Strongly agree | Agree          | Neutral        | Strongly agree | Strongly Agree | Strongly agree | Abit too much science                | About the same                | About 2 hours (~120 mins)                |

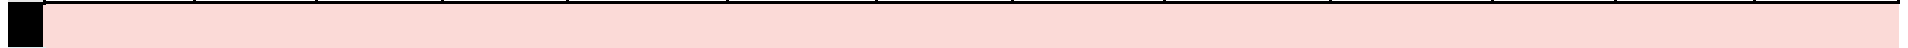

|       |                    |         |          |                |                |                |          |         |                |                   |                                      |                               |                                            |
|-------|--------------------|---------|----------|----------------|----------------|----------------|----------|---------|----------------|-------------------|--------------------------------------|-------------------------------|--------------------------------------------|
| Sp 22 | 2/23/2022 16:03:25 | Agree   | Disagree | Strongly Agree | Agree          | Disagree       | Neutral  | Agree   | Strongly Agree | Neutral           | Perfect, I learned a lot and had fun | About the same                | About two hours and 15 minutes (~135 mins) |
| Sp 22 | 2/25/2022 9:42:12  | Agree   | Neutral  | Neutral        | Agree          | Agree          | Agree    | Neutral | Neutral        | Disagree          | Perfect, I learned a lot and had fun | About the same                | More than 2.5 hours (>150 mins)            |
| Sp 22 | 2/27/2022 9:55:10  | Neutral | Agree    | Strongly Agree | Strongly agree | Agree          | Agree    | Agree   | Agree          | Disagree          | Perfect, I learned a lot and had fun | About the same                | About two hours and 15 minutes (~135 mins) |
| Sp 22 | 2/27/2022 21:07:39 | Agree   | Agree    | Agree          | Neutral        | Strongly agree | Agree    | Agree   | Neutral        | Neutral           | Abit more science would be good      | Abit more by playing the game | About 2 hours (~120 mins)                  |
| Sp 22 | 2/27/2022 22:20:23 | Agree   | Disagree | Agree          | Agree          | Neutral        | Agree    | Neutral | Agree          | Neutral           | Perfect, I learned a lot and had fun | About the same                | About 2 hours (~120 mins)                  |
| Sp 22 | 2/27/2022 22:23:34 | Agree   | Agree    | Agree          | Strongly agree | Strongly agree | Agree    | Neutral | Strongly Agree | Agree             | Perfect, I learned a lot and had fun | Abit less by playing the game | About two and a half hours (~150 mins)     |
| Sp 22 | 2/14/2022 18:45:58 | Agree   | Neutral  | Agree          | Agree          | Neutral        | Agree    | Neutral | Agree          | Neutral           | Perfect, I learned a lot and had fun | Abit more by playing the game | About an hour and 45 minutes (~105 mins)   |
| Sp 22 | 2/16/2022 20:06:28 | Agree   | Neutral  | Strongly Agree | Agree          | Neutral        | Disagree | Agree   | Agree          | Strongly disagree | Abit too much science                | Abit less by playing the game | About 2 hours (~120 mins)                  |
| Sp 22 | 3/3/2022 14:02:54  | Agree   | Neutral  | Agree          | Agree          | Neutral        | Agree    | Neutral | Agree          | Neutral           | Perfect, I learned a lot and had fun | Abit more by playing the game | About 2 hours (~120 mins)                  |

|          |                    |                |                   |                |                |                |                |                |                |                   |                                      |                                        |                                          |
|----------|--------------------|----------------|-------------------|----------------|----------------|----------------|----------------|----------------|----------------|-------------------|--------------------------------------|----------------------------------------|------------------------------------------|
| Sp<br>22 | 3/6/2022 11:27:00  | Agree          | Disagree          | Strongly Agree | Strongly agree | Agree          | Strongly agree | Strongly agree | Strongly Agree | Strongly disagree | Perfect, I learned a lot and had fun | A bit more by playing the game         | About an hour and a half (~90 mins)      |
| Sp<br>22 | 3/9/2022 8:40:43   | Agree          | Neutral           | Strongly Agree | Agree          | Agree          | Strongly agree | Neutral        | Strongly Agree | Neutral           | Perfect, I learned a lot and had fun | A bit more by playing the game         | About an hour and a half (~90 mins)      |
| Sp<br>22 | 2/25/2022 19:18:52 | Disagree       | Strongly Disagree | Strongly Agree    | Way too much science                 | Significantly less by playing the game | About an hour and 15 minutes (~75 mins)  |
| Sp<br>22 | 2/25/2022 19:20:21 | Neutral        | Disagree          | Agree          | Agree          | Disagree       | Disagree       | Agree          | Strongly Agree | Disagree          | Perfect, I learned a lot and had fun | A bit more by playing the game         | About an hour and 15 minutes (~75 mins)  |
| Sp<br>22 | 2/25/2022 19:21:43 | Disagree       | Disagree          | Strongly Agree | Agree          | Strongly agree | Strongly agree | Agree          | Agree          | Disagree          | A bit too much science               | About the same                         | About 2 hours (~120 mins)                |
| Sp<br>22 | 2/25/2022 19:22:23 | Strongly Agree | Agree             | Agree          | Disagree       | Strongly agree | Strongly agree | Strongly agree | Strongly Agree | Agree             | Perfect, I learned a lot and had fun | A bit less by playing the game         | About 2 hours (~120 mins)                |
| Sp<br>22 | 2/25/2022 19:22:37 | Agree          | Agree             | Neutral        | Neutral        | Disagree       | Agree          | Agree          | Agree          | Disagree          | A bit too much science               | A bit more by playing the game         | About an hour and 45 minutes (~105 mins) |
| Sp<br>22 | 2/25/2022 19:23:09 | Agree          | Agree             | Neutral        | Neutral        | Agree          | Agree          | Agree          | Agree          | Agree             | Perfect, I learned a lot and had fun | A bit less by playing the game         | About an hour and 45 minutes (~105 mins) |
| Sp<br>22 | 2/25/2022 19:24:22 | Strongly Agree | Agree             | Strongly Agree | Agree          | Agree          | Disagree       | Agree          | Strongly Agree | Neutral           | Perfect, I learned a lot and had fun | About the same                         | About 2 hours (~120 mins)                |
| Sp<br>22 | 2/25/2022 19:24:40 | Strongly Agree | Agree             | Strongly Agree | Agree          | Strongly agree | Agree          | Agree          | Strongly Agree | Neutral           | Perfect, I learned a lot and had fun | A bit more by playing the game         | About 2 hours (~120 mins)                |
| Sp<br>22 | 2/25/2022 19:25:18 | Agree          | Disagree          | Agree          | Disagree       | Agree          | Neutral        | Agree          | Strongly Agree | Disagree          | Perfect, I learned a lot and had fun | A bit less by playing the game         | About 2 hours (~120 mins)                |
| Sp<br>22 | 2/28/2022 12:19:41 | Agree          | Disagree          | Strongly Agree | Strongly agree | Agree          | Strongly agree | Agree          | Strongly Agree | Agree             | A bit too much science               | A bit more by playing the game         | About two and a half hours (~150 mins)   |

[illegible]



|          |            |                |                |                |                |                |                   |                |                |                |                                      |                                |                                                     |
|----------|------------|----------------|----------------|----------------|----------------|----------------|-------------------|----------------|----------------|----------------|--------------------------------------|--------------------------------|-----------------------------------------------------|
| Sp<br>21 | Spring2021 | No Response       | No Response    | No Response    | No Response    | No Response                          | No Response                    | No Response                                         |
| Sp<br>21 | Spring2021 | Strongly Agree | Agree          | Strongly Agree | Strongly Agree | Strongly Agree | Strongly Agree    | Neutral        | Agree          | Agree          | Perfect, I learned a lot and had fun | About the same                 | About 2 hours (~120 mins)                           |
| Sp<br>21 | Spring2021 | Strongly Agree | Strongly Agree | Strongly Agree | Strongly Agree | Agree          | Strongly Agree    | Strongly Agree | Strongly Agree | Strongly Agree | Perfect, I learned a lot and had fun | A bit less by playing the game | About an hour and 45 minutes (~105 mins)            |
| Sp<br>21 | Spring2021 | Agree          | Agree, Neutral | Strongly Agree | Agree          | Agree          | Agree             | Disagree       | Strongly Agree | Neutral        | Perfect, I learned a lot and had fun | A bit more by playing the game | We didn't finish in the 2 hour lab time (>120 mins) |
| Sp<br>21 | Spring2021 | No Response       | No Response    | No Response    | No Response    | No Response                          | No Response                    | No Response                                         |
| Sp<br>21 | Spring2021 | No Response       | No Response    | No Response    | No Response    | No Response                          | No Response                    | No Response                                         |
| Sp<br>21 | Spring2021 | Agree          | Strongly Agree | Strongly Agree | Strongly Agree | Strongly Agree | Strongly Agree    | Agree          | Strongly Agree | Agree          | Perfect, I learned a lot and had fun | About the same                 | About 2 hours (~120 mins)                           |
| Sp<br>21 | Spring2021 | Neutral        | Disagree       | Agree          | Agree          | Agree          | Agree             | Agree          | Agree          | Disagree       | A bit too much science               | A bit more by playing the game | About 2 hours (~120 mins)                           |
| Sp<br>21 | Spring2021 | Disagree       | Disagree       | Neutral        | Agree          | Disagree       | Strongly Disagree | Neutral        | Neutral        | Neutral        | Way too much science                 | A bit less by playing the game | We didn't finish in the 2 hour lab time (>120 mins) |
| Sp<br>21 | Spring2021 | Agree          | Neutral        | Agree          | Agree          | Agree          | Agree             | Agree          | Agree          | Neutral        | Perfect, I learned a lot and had fun | About the same                 | About an hour and a half (~90 mins)                 |
| Sp<br>21 | Spring2021 | No Response       | No Response    | No Response    | No Response    | No Response                          | No Response                    | No Response                                         |
| Sp<br>21 | Spring2021 | Agree          | Agree          | Agree          | Agree          | Strongly Agree | Agree             | Agree          | Agree          | Agree          | Perfect, I learned a lot and had fun | About the same                 | About an hour and 45 minutes (~105 mins)            |
| Sp<br>21 | Spring2021 | Agree          | Agree          | Agree          | Agree          | Strongly Agree | Neutral           | Agree          | Agree          | Disagree       | Perfect, I learned a lot and had fun | About the same                 | About an hour and 15 minutes (~75 mins)             |



|          |            |             |             |                |                |                |                |                |                |                   |                                      |                                        |                                                     |
|----------|------------|-------------|-------------|----------------|----------------|----------------|----------------|----------------|----------------|-------------------|--------------------------------------|----------------------------------------|-----------------------------------------------------|
| Sp<br>21 | Spring2021 | Disagree    | Neutral     | Agree          | Agree          | Agree          | Neutral        | Disagree       | Disagree       | Disagree          | Perfect, I learned a lot and had fun | About the same                         | We didn't finish in the 2 hour lab time (>120 mins) |
| Sp<br>21 | Spring2021 | Agree       | Neutral     | Agree          | Agree          | Strongly Agree | Agree          | Agree          | Neutral        | Disagree          | A bit too much science               | A bit more by playing the game         | We didn't finish in the 2 hour lab time (>120 mins) |
| Sp<br>21 | Spring2021 | Agree       | Disagree    | Neutral        | Neutral        | Agree          | Neutral        | Neutral        | Neutral        | Disagree          | A bit too much science               | Significantly less by playing the game | We didn't finish in the 2 hour lab time (>120 mins) |
| Sp<br>21 | Spring2021 | Agree       | Agree       | Agree          | Strongly Agree | Strongly Agree | Agree          | Neutral        | Neutral        | Disagree          | Perfect, I learned a lot and had fun | A bit more by playing the game         | About an hour and 45 minutes (~105 mins)            |
| Sp<br>21 | Spring2021 | No Response | No Response | No Response    | No Response    | No Response    | No Response    | No Response    | No Response    | No Response       | No Response                          | No Response                            | No Response                                         |
| Sp<br>21 | Spring2021 | Agree       | Agree       | Agree          | Strongly Agree | Strongly Agree | Strongly Agree | Disagree       | Strongly Agree | Agree             | A bit more science would be good     | About the same                         | We didn't finish in the 2 hour lab time (>120 mins) |
| Sp<br>21 | Spring2021 | Disagree    | Agree       | Agree          | Agree          | Agree          | Agree          | Strongly Agree | Strongly Agree | Strongly Disagree | Perfect, I learned a lot and had fun | A bit less by playing the game         | We didn't finish in the 2 hour lab time (>120 mins) |
| Sp<br>21 | Spring2021 | Agree       | Agree       | Strongly Agree | Agree          | Strongly Agree | Strongly Agree | Neutral        | Agree          | Neutral           | Perfect, I learned a lot and had fun | About the same                         | We didn't finish in the 2 hour lab time (>120 mins) |
| Sp<br>21 | Spring2021 | Disagree    | Disagree    | Agree          | Agree          | Agree          | Disagree       | Disagree       | Disagree       | Disagree          | Way too much science                 | Significantly less by playing the game | We didn't finish in the 2 hour lab time (>120 mins) |
| Sp<br>21 | Spring2021 | Agree       | Agree       | Agree          | Agree          | Strongly Agree | Strongly Agree | Agree          | Agree          | Agree             | Perfect, I learned a lot and had fun | A bit more by playing the game         | About an hour and 45 minutes (~105 mins)            |
| Sp<br>21 | Spring2021 | Agree       | Neutral     | Agree          | Neutral        | Agree          | Agree          | Agree          | Agree          | Neutral           | A bit more science would be good     | A bit less by playing the game         | About an hour and a half (~90 mins)                 |



|       |            |                       |                |                |             |                       |             |             |                |                   |                                      |                                        |                                                     |
|-------|------------|-----------------------|----------------|----------------|-------------|-----------------------|-------------|-------------|----------------|-------------------|--------------------------------------|----------------------------------------|-----------------------------------------------------|
| Sp 21 | Spring2021 | Disagree              | Disagree       | Neutral        | Agree       | Agree                 | Neutral     | Disagree    | Agree          | Strongly Disagree | Abit too much science                | Significantly less by playing the game | We didn't finish in the 2 hour lab time (>120 mins) |
| Sp 21 | Spring2021 | Agree                 | Neutral        | Agree          | Agree       | Agree                 | Agree       | Neutral     | Agree          | Disagree          | Perfect, I learned a lot and had fun | Abit more by playing the game          | We didn't finish in the 2 hour lab time (>120 mins) |
| Sp 21 | Spring2021 | Agree                 | Disagree       | Agree          | Agree       | Neutral               | Neutral     | Disagree    | Agree          | Disagree          | Abit too much science                | About the same                         | We didn't finish in the 2 hour lab time (>120 mins) |
| Sp 21 | Spring2021 | Neutral               | Disagree       | Agree          | Agree       | Agree                 | Agree       | Agree       | Strongly Agree | Strongly Disagree | Abit too much science                | Abit more by playing the game          | We didn't finish in the 2 hour lab time (>120 mins) |
| Sp 21 | Spring2021 | Agree                 | Neutral        | Agree          | Agree       | Agree                 | Disagree    | Neutral     | Neutral        | Neutral           | Abit more science would be good      | About the same                         | We didn't finish in the 2 hour lab time (>120 mins) |
| Sp 21 | Spring2021 | Strongly Agree        | Strongly Agree | Strongly Agree | Agree       | Strongly Agree        | Agree       | Agree       | Strongly Agree | Neutral           | Perfect, I learned a lot and had fun | Abit more by playing the game          | We didn't finish in the 2 hour lab time (>120 mins) |
| Sp 21 | Spring2021 | No Response           | No Response    | No Response    | No Response | No Response           | No Response | No Response | No Response    | No Response       | No Response                          | No Response                            | No Response                                         |
| Sp 21 | Spring2021 | Agree                 | Neutral        | Agree          | Agree       | Agree                 | Neutral     | Neutral     | Neutral        | Disagree          | Perfect, I learned a lot and had fun | Abit less by playing the game          | We didn't finish in the 2 hour lab time (>120 mins) |
| Sp 21 | Spring2021 | Neutral               | Disagree       | Agree          | Agree       | Neutral               | Neutral     | Disagree    | Neutral        | Disagree          | Abit too much science                | Abit less by playing the game          | About 2 hours (~120 mins)                           |
| Sp 21 | Spring2021 | Strongly Agree, Agree | Agree, Neutral | Neutral        | Agree       | Strongly Agree, Agree | Agree       | Agree       | Agree          | Agree, Neutral    | Perfect, I learned a lot and had fun | About the same                         | About an hour and a half (~90 mins)                 |
| Sp 21 | Spring2021 | No Response           | No Response    | No Response    | No Response | No Response           | No Response | No Response | No Response    | No Response       | No Response                          | No Response                            | No Response                                         |
| Sp 21 | Spring2021 | Disagree              | Disagree       | Disagree       | Disagree    | Agree                 | Disagree    | Disagree    | Disagree       | Disagree          | Abit more science would be good      | Significantly less by playing the game | We didn't finish in the 2 hour lab time (>120 mins) |

|       |            |         |          |         |                |                   |                |          |                |          |                                      |                                        |                                                     |
|-------|------------|---------|----------|---------|----------------|-------------------|----------------|----------|----------------|----------|--------------------------------------|----------------------------------------|-----------------------------------------------------|
|       |            |         |          |         |                |                   |                |          |                |          |                                      |                                        |                                                     |
| Sp 21 | Spring2021 | Agree   | Neutral  | Agree   | Strongly Agree | Strongly Agree    | Strongly Agree | Neutral  | Strongly Agree | Agree    | Perfect, I learned a lot and had fun | A bit less by playing the game         | We didn't finish in the 2 hour lab time (>120 mins) |
| Sp 21 | Spring2021 | Neutral | Agree    | Neutral | Agree          | Agree             | Agree          | Neutral  | Agree          | Neutral  | Perfect, I learned a lot and had fun | A bit more by playing the game         | We didn't finish in the 2 hour lab time (>120 mins) |
| Sp 21 | Spring2021 | Agree   | Neutral  | Agree   | Agree          | Agree             | Agree          | Neutral  | Neutral        | Agree    | Perfect, I learned a lot and had fun | About the same                         | About 2 hours (~120 mins)                           |
| Sp 21 | Spring2021 | Agree   | Agree    | Neutral | Neutral        | Agree             | Agree          | Disagree | Agree          | Agree    | Perfect, I learned a lot and had fun | About the same                         | We didn't finish in the 2 hour lab time (>120 mins) |
| Sp 21 | Spring2021 | Neutral | Disagree | Neutral | Disagree       | Strongly Agree    | Neutral        | Disagree | Disagree       | Disagree | A bit more science would be good     | Significantly less by playing the game | We didn't finish in the 2 hour lab time (>120 mins) |
| Sp 21 | Spring2021 | Agree   | Disagree | Agree   | Agree          | Agree             | Agree          | Disagree | Strongly Agree | Disagree | A bit too much science               | A bit more by playing the game         | About an hour and a half (~90 mins)                 |
| Sp 21 | Spring2021 | Neutral | Disagree | Agree   | Agree          | Disagree          | Agree          | Disagree | Disagree       | Neutral  | Perfect, I learned a lot and had fun | About the same                         | We didn't finish in the 2 hour lab time (>120 mins) |
| Sp 21 | Spring2021 | Agree   | Neutral  | Agree   | Strongly Agree | Strongly Disagree | Neutral        | Agree    | Neutral        | Agree    | A bit too much science               | A bit more by playing the game         | We didn't finish in the 2 hour lab time (>120 mins) |

[illegible]

|                  |                |             |                |             |                |             |             |                       |                |                                      |                                        |                                                     |
|------------------|----------------|-------------|----------------|-------------|----------------|-------------|-------------|-----------------------|----------------|--------------------------------------|----------------------------------------|-----------------------------------------------------|
| F 22 Fall2021    | No Response    | No Response | No Response    | No Response | No Response    | No Response | No Response | No Response           | No Response    | No Response                          | No Response                            | No Response                                         |
| F 22 Fall2021    | Strongly Agree | Agree       | Strongly Agree | Agree       | Agree          | Agree       | Agree       | Strongly Agree        | Neutral        | Perfect, I learned a lot and had fun | Significantly more by playing the game | About 2 hours (~120 mins)                           |
| F 22 Fall2021    | No Response    | No Response | No Response    | No Response | No Response    | No Response | No Response | No Response           | No Response    | No Response                          | No Response                            | No Response                                         |
| F 22 Fall2021    | No Response    | No Response | No Response    | No Response | No Response    | No Response | No Response | No Response           | No Response    | No Response                          | No Response                            | No Response                                         |
| F 22 Fall2021    | Agree          | Disagree    | Agree          | Neutral     | Agree          | Neutral     | Agree       | Strongly Agree, Agree | Disagree       | Perfect, I learned a lot and had fun | A bit more by playing the game         | About an hour (~60 mins)                            |
| F 22 Fall2021    | No Response    | No Response | No Response    | No Response | No Response    | No Response | No Response | No Response           | No Response    | No Response                          | No Response                            | No Response                                         |
| F 22 Fall2021    | Neutral        | Neutral     | Agree          | Agree       | Neutral        | Neutral     | Agree       | Disagree              | Disagree       | Perfect, I learned a lot and had fun | A bit more by playing the game         | About an hour (~60 mins)                            |
| F 22 Fall2021    | Disagree       | Disagree    | Agree          | Agree       | Agree          | Agree       | Neutral     | Agree                 | Disagree       | A bit more science would be good     | About the same                         | About an hour (~60 mins)                            |
| F 22 Fall2021    | Agree          | Agree       | Agree          | Agree       | Agree          | Agree       | Agree       | Agree                 | Neutral        | Perfect, I learned a lot and had fun | Significantly more by playing the game | About an hour (~60 mins)                            |
| F 22 Fall2021    | No Response    | No Response | No Response    | No Response | No Response    | No Response | No Response | No Response           | No Response    | No Response                          | No Response                            | No Response                                         |
| F 22 Fall2021    | No Response    | No Response | No Response    | No Response | No Response    | No Response | No Response | No Response           | No Response    | No Response                          | No Response                            | No Response                                         |
|                  |                |             |                |             |                |             |             |                       |                |                                      |                                        |                                                     |
| Sp 22 Spring2022 | Agree          | Neutral     | Agree          | Agree       | Strongly Agree | Agree       | Agree       | Agree                 | Strongly Agree | Perfect, I learned a lot and had fun | About the same                         | We didn't finish in the 2 hour lab time (>120 mins) |
| Sp 22 Spring2022 | Strongly Agree | Neutral     | Strongly Agree | Agree       | Strongly Agree | Agree       | Neutral     | Agree                 | Agree          | Perfect, I learned a lot and had fun | About the same                         | About 2 hours (~120 mins)                           |
| Sp 22 Spring2022 | Agree          | Neutral     | Agree          | Agree       | Agree          | Agree       | Agree       | Agree                 | Neutral        | A bit more science would be good     | A bit less by playing the game         | About an hour and 45 minutes (~105 mins)            |

|          |            |                   |                          |                |                |                |                |             |                |                             |                                      |                                        |                                          |
|----------|------------|-------------------|--------------------------|----------------|----------------|----------------|----------------|-------------|----------------|-----------------------------|--------------------------------------|----------------------------------------|------------------------------------------|
|          |            |                   |                          |                |                |                |                |             |                |                             |                                      |                                        |                                          |
| Sp<br>22 | Spring2022 | Agree             | Disagree                 | Agree          | Agree          | Strongly Agree | Agree          | Neutral     | Neutral        | Disagree                    | Abit too much science                | Abit more by playing the game          | About an hour and 45 minutes (~105 mins) |
| Sp<br>22 | Spring2022 | Disagree          | Neutral                  | Neutral        | Agree          | Neutral        | Neutral        | Disagree    | Neutral        | Strongly Disagree           | Abit too much science                | Significantly less by playing the game | About an hour and 45 minutes (~105 mins) |
| Sp<br>22 | Spring2022 | Agree             | Agree                    | Agree          | Agree          | Agree          | Agree          | Agree       | Agree          | Neutral                     | Perfect, I learned a lot and had fun | Abit more by playing the game          | About an hour and 45 minutes (~105 mins) |
| Sp<br>22 | Spring2022 | Strongly Agree    | Strongly Agree, Disagree | Strongly Agree | Strongly Agree | Strongly Agree | Strongly Agree | Neutral     | Strongly Agree | Agree                       | Abit too much science                | Significantly more by playing the game | About 2 hours (~120 mins)                |
| Sp<br>22 | Spring2022 | Agree             | Strongly Agree           | Agree          | Neutral        | Agree          | Strongly Agree | Neutral     | Agree          | Strongly Agree              | Perfect, I learned a lot and had fun | Significantly more by playing the game | About an hour and 45 minutes (~105 mins) |
| Sp<br>22 | Spring2022 | Agree             | Neutral                  | Agree          | Agree          | Strongly Agree | Strongly Agree | Disagree    | Disagree       | Agree                       | Abit more science would be good      | Abit less by playing the game          | About an hour and 15 minutes (~75 mins)  |
| Sp<br>22 | Spring2022 | Neutral, Disagree | Disagree                 | Agree          | Agree          | Agree          | Agree          | Agree       | Strongly Agree | Disagree, Strongly Disagree | Abit too much science                | About the same                         | About an hour and a half (~90 mins)      |
| Sp<br>22 | Spring2022 | No Response       | No Response              | No Response    | No Response    | No Response    | No Response    | No Response | No Response    | No Response                 | No Response                          | No Response                            | No Response                              |
| Sp<br>22 | Spring2022 | Disagree          | Strongly Disagree        | Agree          | Neutral        | Agree          | Agree          | Neutral     | Agree          | Strongly Disagree           | Abit too much science                | About the same                         | About 2 hours (~120 mins)                |
| Sp<br>22 | Spring2022 | No Response       | No Response              | No Response    | No Response    | No Response    | No Response    | No Response | No Response    | No Response                 | No Response                          | No Response                            | No Response                              |
| Sp<br>22 | Spring2022 | Strongly Agree    | Neutral                  | Strongly Agree | Strongly Agree | Agree          | Agree          | Agree       | Strongly Agree | Strongly Agree              | Perfect, I learned a lot and had fun | Significantly more by playing the game | About an hour and 15 minutes (~75 mins)  |

|          |            |                |             |                |                |                |                |                |                |                |                                      |                                        |                                                     |
|----------|------------|----------------|-------------|----------------|----------------|----------------|----------------|----------------|----------------|----------------|--------------------------------------|----------------------------------------|-----------------------------------------------------|
| Sp<br>22 | Spring2022 | Agree          | Agree       | Agree          | Agree          | Agree          | Strongly Agree | Agree          | Agree          | Neutral        | Perfect, I learned a lot and had fun | A bit more by playing the game         | About an hour (~60 mins)                            |
| Sp<br>22 | Spring2022 | No Response    | No Response | No Response    | No Response    | No Response    | No Response    | No Response    | No Response    | No Response    | No Response                          | No Response                            | No Response                                         |
| Sp<br>22 | Spring2022 | Agree          | Disagree    | Agree          | Agree          | Strongly Agree | Agree          | Agree, Neutral | Agree          | Neutral        | A bit too much science               | About the same                         | About an hour and a half (~90 mins)                 |
| Sp<br>22 | Spring2022 | Agree          | Disagree    | Strongly Agree | Strongly Agree | Strongly Agree | Strongly Agree | Agree          | Agree          | Agree          | Perfect, I learned a lot and had fun | About the same                         | About an hour and 45 minutes (~105 mins)            |
| Sp<br>22 | Spring2022 | Agree          | Agree       | Strongly Agree | Strongly Agree | Strongly Agree | Agree          | Neutral        | Strongly Agree | Strongly Agree | A bit too much science               | A bit more by playing the game         | About an hour and 45 minutes (~105 mins)            |
| Sp<br>22 | Spring2022 | Strongly Agree | Agree       | Strongly Agree | Strongly Agree | Neutral        | Strongly Agree | Strongly Agree | Strongly Agree | Strongly Agree | Perfect, I learned a lot and had fun | Significantly more by playing the game | We didn't finish in the 2 hour lab time (>120 mins) |
| Sp<br>22 | Spring2022 | No Response    | No Response | No Response    | No Response    | No Response    | No Response    | No Response    | No Response    | No Response    | No Response                          | No Response                            | No Response                                         |
| Sp<br>22 | Spring2022 | Neutral        | Agree       | Agree          | Agree          | Agree          | Agree          | Agree          | Agree          | Disagree       | Perfect, I learned a lot and had fun | A bit more by playing the game         | About an hour and 45 minutes (~105 mins)            |
| Sp<br>22 | Spring2022 | Agree          | Neutral     | Agree          | Agree          | Agree          | Agree          | Agree          | Agree          | Neutral        | Perfect, I learned a lot and had fun | A bit more by playing the game         | About an hour and 45 minutes (~105 mins)            |
| Sp<br>22 | Spring2022 | Neutral        | Agree       | Agree          | Neutral        | Agree          | Agree          | Agree          | Agree          | Disagree       | A bit more science would be good     | About the same                         | About an hour and a half (~90 mins)                 |
| Sp<br>22 | Spring2022 | Agree          | Disagree    | Agree          | Agree          | Neutral        | Agree          | Neutral        | Agree          | Agree          | A bit too much science               | A bit more by playing the game         | About an hour (~60 mins)                            |
| Sp<br>22 | Spring2022 | Agree          | Neutral     | Strongly Agree | Agree          | A bit more science would be good     | A bit more by playing the game         | We didn't finish in the 2 hour lab time (>120 mins) |



|          |            |                         |                |                       |                       |                |                |                   |                |                       |                                                              |                                |                                          |
|----------|------------|-------------------------|----------------|-----------------------|-----------------------|----------------|----------------|-------------------|----------------|-----------------------|--------------------------------------------------------------|--------------------------------|------------------------------------------|
| Sp<br>22 | Spring2022 | Agree, Neutral          | Neutral        | Agree                 | Agree                 | Neutral        | Neutral        | Agree             | Agree          | Neutral               | Perfect, I learned a lot and had fun, A bit too much science | About the same                 | About 2 hours (~120 mins)                |
| Sp<br>22 | Spring2022 | Agree                   | Agree          | Agree                 | Agree                 | Neutral        | Agree          | Neutral           | Agree          | Agree                 | A bit too much science                                       | About the same                 | About an hour and 45 minutes (~105 mins) |
| Sp<br>22 | Spring2022 | No Response             | No Response    | No Response           | No Response           | No Response    | No Response    | No Response       | No Response    | No Response           | No Response                                                  | No Response                    | No Response                              |
| Sp<br>22 | Spring2022 | Strongly Agree          | Strongly Agree | Strongly Agree        | Strongly Agree        | Strongly Agree | Strongly Agree | Strongly Agree    | Strongly Agree | Strongly Agree        | Perfect, I learned a lot and had fun                         | A bit more by playing the game | About an hour (~60 mins)                 |
| Sp<br>22 | Spring2022 | Agree                   | Agree          | Agree                 | Neutral               | Strongly Agree | Agree          | Neutral           | Agree          | Neutral               | A bit more science would be good                             | A bit more by playing the game | About 2 hours (~120 mins)                |
| Sp<br>22 | Spring2022 | No Response             | No Response    | No Response           | No Response           | No Response    | No Response    | No Response       | No Response    | No Response           | No Response                                                  | No Response                    | No Response                              |
| Sp<br>22 | Spring2022 | Strongly Agree, Neutral | Neutral        | Agree                 | Agree                 | Agree          | Agree          | Agree             | Agree          | Agree                 | Perfect, I learned a lot and had fun, A bit too much science | About the same                 | About an hour (~60 mins)                 |
| Sp<br>22 | Spring2022 | No Response             | No Response    | No Response           | No Response           | No Response    | No Response    | No Response       | No Response    | No Response           | No Response                                                  | No Response                    | No Response                              |
| Sp<br>22 | Spring2022 | Agree                   | Agree          | Strongly Agree, Agree | Strongly Agree, Agree | Agree, Neutral | Agree          | Agree             | Agree          | Strongly Agree, Agree | Perfect, I learned a lot and had fun                         | About the same                 | About an hour (~60 mins)                 |
| Sp<br>22 | Spring2022 | Agree                   | Neutral        | Agree                 | Agree                 | Agree          | Agree          | Agree             | Strongly Agree | Agree                 | Perfect, I learned a lot and had fun                         | About the same                 | About 2 hours (~120 mins)                |
| Sp<br>22 | Spring2022 | Neutral                 | Neutral        | Agree                 | Agree                 | Agree          | Agree          | Strongly Disagree | Strongly Agree | Strongly Disagree     | A bit too much science                                       | About the same                 | About an hour and a half (~90 mins)      |
| Sp<br>22 | Spring2022 | Agree                   | Neutral        | Agree                 | Strongly Agree        | Strongly Agree | Strongly Agree | Agree             | Agree          | Disagree              | Perfect, I learned a lot and had fun                         | A bit more by playing the game | About an hour and 45 minutes (~105 mins) |



[illegible]

| Indicate your level of agreement with the following statement: "I would rather play this game than have a regular class or lab." | What did you like most about the game?                                                                                     | What did you like least about the game (i.e., what could be improved)?                                                                                                                                                                                                                                                                                                     | Do you have any other feedback that you think would be useful for the game's creators?                                                                                                                                                                                                                                                                                 |
|----------------------------------------------------------------------------------------------------------------------------------|----------------------------------------------------------------------------------------------------------------------------|----------------------------------------------------------------------------------------------------------------------------------------------------------------------------------------------------------------------------------------------------------------------------------------------------------------------------------------------------------------------------|------------------------------------------------------------------------------------------------------------------------------------------------------------------------------------------------------------------------------------------------------------------------------------------------------------------------------------------------------------------------|
| Disagree                                                                                                                         | The different game boards and that multiple people could use the same layout so you could see and compare the two results. | The tokens were unwieldy and hard to sort/get. I know it's not as nice or visually appealing (and worse for visually associating coral types to images) but if they were blocks like in Pandemic they would be easier to get a hold of and keep track of. Also the instructions were at some points self-contradictory, and the in-game turn order card was hard to follow | LOVED the stacking mechanic. Although the fleshy algae was almost impossible to manage                                                                                                                                                                                                                                                                                 |
| Disagree                                                                                                                         | It was a lot of fun and I really like strategy games so I enjoyed creating a strategy for the game                         | It was a lot of picking up and searching for more pieces to use. Not sure how that could be improved other than better piece organization or it not being a physical board game                                                                                                                                                                                            | It could be interesting to have the game not be physical, and have an online component instead. It would probably make the game quicker to play due to most of the game was just looking for pieces instead of playing, and would likely make it simpler to look at and play.                                                                                          |
| Agree                                                                                                                            | It was a fun and engaging way to learn about reefs                                                                         | The instructions could have been less wordy and easier to understand                                                                                                                                                                                                                                                                                                       | More disasters                                                                                                                                                                                                                                                                                                                                                         |
| Agree                                                                                                                            | I liked competing against my friends and seeing them really get into it.                                                   | I thought the game ran a little long, but that may have been since our lab is only 2 hours.                                                                                                                                                                                                                                                                                | The game is a little complex for the average, non-scientist player, it might do good to simplify it a bit. Another option would be to make an online version of this game, where the computer can handle some of the complexities.                                                                                                                                     |
| Disagree                                                                                                                         | I liked the variation of different organisms you could have in your reef                                                   | The rules were very complex and there were situations not covered in the instructions                                                                                                                                                                                                                                                                                      | I would recommend that the rules have players go in turns (Start with the lowest scorer, or something along those lines) as it got chaotic as everyone was making different moves at different times.                                                                                                                                                                  |
| Neutral                                                                                                                          | The concept of building a reef community and the random mutations and disasters                                            | Description of game play rules were a little confusing                                                                                                                                                                                                                                                                                                                     | Overall, it was a pretty enjoyable experience                                                                                                                                                                                                                                                                                                                          |
| Agree                                                                                                                            | I liked how much variety of reef builders there were.                                                                      | The graphic design of the boards was a bit too bland. The fonts were easy to read but uninteresting.                                                                                                                                                                                                                                                                       | Overall, I felt the game was a little too complicated for what instructions we were given. There were some situations where somethings just were not explained (like when and how exactly you place juvenile builders on the board at the end of the round). Also, adding some more graphics or different font styles might help make the game more visually engaging. |
| Agree                                                                                                                            | The strategy involved.                                                                                                     | We didn't have enough of each reef card type for everyone to play the one they wanted.                                                                                                                                                                                                                                                                                     | Just for fun, maybe make a mode where 1 person plays the algae?                                                                                                                                                                                                                                                                                                        |
|                                                                                                                                  |                                                                                                                            |                                                                                                                                                                                                                                                                                                                                                                            |                                                                                                                                                                                                                                                                                                                                                                        |
|                                                                                                                                  |                                                                                                                            |                                                                                                                                                                                                                                                                                                                                                                            |                                                                                                                                                                                                                                                                                                                                                                        |
|                                                                                                                                  |                                                                                                                            |                                                                                                                                                                                                                                                                                                                                                                            |                                                                                                                                                                                                                                                                                                                                                                        |
|                                                                                                                                  |                                                                                                                            |                                                                                                                                                                                                                                                                                                                                                                            |                                                                                                                                                                                                                                                                                                                                                                        |
|                                                                                                                                  |                                                                                                                            |                                                                                                                                                                                                                                                                                                                                                                            |                                                                                                                                                                                                                                                                                                                                                                        |
| Neutral                                                                                                                          | How it relates to class and how we can enjoy playing a game while still learning                                           | A bit confused on how to play at first                                                                                                                                                                                                                                                                                                                                     |                                                                                                                                                                                                                                                                                                                                                                        |

|                |                                                                                                                                                                    |                                                                                                                                                                                               |                                                                                                                                                                    |
|----------------|--------------------------------------------------------------------------------------------------------------------------------------------------------------------|-----------------------------------------------------------------------------------------------------------------------------------------------------------------------------------------------|--------------------------------------------------------------------------------------------------------------------------------------------------------------------|
| Agree          | Nice pictures of organisms                                                                                                                                         | So many mutations.                                                                                                                                                                            |                                                                                                                                                                    |
| Strongly agree | The picture                                                                                                                                                        | Keeping track of all of the kinds of builders and their mutations.                                                                                                                            | The ashy pieces were a nuisance as the pieces made our hands black after awhile                                                                                    |
| Agree          | It was fun and was always changing and if you were "losing" you could easily be "winning" the next round.                                                          | The dirty game pieces leaving soot on my hands.                                                                                                                                               | n/a                                                                                                                                                                |
| Strongly agree | I liked the disasters because it was fun to see what kind of event would impact the reef                                                                           | maybe a bigger board to play on                                                                                                                                                               |                                                                                                                                                                    |
| Disagree       | Competing                                                                                                                                                          | There were too many mutations. Further into the game it got really hard to keep up with all of the different mutations on all of the different organisms, specifically when adding juveniles. |                                                                                                                                                                    |
| Neutral        | I liked the strategy component of the game, once you understand the rules better you can develop your moves to try and earn the most points.                       | It was difficult to count points and generating offspring was tedious                                                                                                                         |                                                                                                                                                                    |
| Strongly agree | I really liked the comprehensive nature of the game. All facets of a reef environment seemed to be represented somewhere, which is what allowed me to learn a lot. | N/A                                                                                                                                                                                           | Using clearer game pieces, especially for the reef builders (they all had the same contrast within the photo and weren't labeled) might make the game go smoother. |
| Agree          | How much variety there is to the game. You could play it a million times and still have different outcomes each time                                               | The rules were a bit hard to follow                                                                                                                                                           |                                                                                                                                                                    |
| Neutral        | Trading and competition/overall interaction with other players' reefs was fun.                                                                                     | The rules were pretty dense and starting was hard.                                                                                                                                            |                                                                                                                                                                    |
| Agree          | I like strategy games once I get the hang of them, and this was a new kind of strategy.                                                                            | It is difficult to get ahead of the fleshy algae, and it is annoying that you have to take out the stacks.                                                                                    | Putting the algae back on after the dwellers ate it seems a bit weird, as you can never get rid of it.                                                             |
| Agree          | I like that because of the structure, each game will be different, making it not so repetitive to play again and again. Prepping for the game was fun and helpful. | The lab packet had different rules than the board materials, which made it very difficult to determine what was correct.                                                                      |                                                                                                                                                                    |
| Disagree       | It was fun to see all the beautiful corals and building a coral reef                                                                                               | The instructions that came with the game and booklet are inconsistent, and the worksheets feel like busy work                                                                                 | Figure out a way to condense the instructions                                                                                                                      |
| Strongly agree | It was great seeing how the reef evolved and changed or didn't change over time.                                                                                   | There were too many nuances to the rules. Some parts of the rules also did not match up                                                                                                       | I feel like fleshy algae never became a particular problem.                                                                                                        |
| Agree          | The colorful tokens and 12 sided die                                                                                                                               | The lack of clarity with what to do with the triangle                                                                                                                                         |                                                                                                                                                                    |
| Disagree       |                                                                                                                                                                    | Rules were inconsistent across game materials (full game guide and cards). Game pieces were too small to stack many mutations                                                                 |                                                                                                                                                                    |
| Strongly agree | The different reef designs                                                                                                                                         | The tags were a lot and stacking them blocked pictures                                                                                                                                        | Maybe a better system to carry tags on the reef inhabitant card                                                                                                    |

|                   |                                                                                                                                                   |                                                                                                                                                                                                                                                                                                               |                                                                                                                        |
|-------------------|---------------------------------------------------------------------------------------------------------------------------------------------------|---------------------------------------------------------------------------------------------------------------------------------------------------------------------------------------------------------------------------------------------------------------------------------------------------------------|------------------------------------------------------------------------------------------------------------------------|
| Agree             | There was a wide variety of components, whether it be possible disasters or possible starting boards or types of specimen. It was very enjoyable! | It was hard to add mutation pieces to each specimen and keep everything organized. It could be nice if maybe each creature could have a clip to indicate its mutation, or a flag we could toggle. The rules were also a bit confusing, since there was incongruence between two versions of the instructions. | Thank you :)                                                                                                           |
| Neutral           | That is makes science more fun.                                                                                                                   | The pre game was a lot of busy work; it could be made short yet effective.                                                                                                                                                                                                                                    |                                                                                                                        |
| Agree             | My favorite part of the game was strategizing which reef map would be best.                                                                       | Maybe it i because my group did not trade organisms between nurseries very often, but I thought there could be more player/player interaction.                                                                                                                                                                |                                                                                                                        |
| Agree             | The mutations added a lot of variety                                                                                                              | Some of the instructions we were given contradicted each other or told different information.                                                                                                                                                                                                                 | There was no practical use for the Coral Triangle in the game.                                                         |
|                   |                                                                                                                                                   |                                                                                                                                                                                                                                                                                                               |                                                                                                                        |
| Strongly disagree | Good concept                                                                                                                                      | The rules were tedious and had so many intricacies it was hard to follow.                                                                                                                                                                                                                                     | It would be easier to follow a step-by-step rule book including what to do with rounds within each phase.              |
| Agree             | It's so fun!!                                                                                                                                     | The instruction was very confusing. it took us a while to figure out how the game works                                                                                                                                                                                                                       | Make it less complicated, simply and straight forward instructions! 😊😊                                                 |
| Neutral           | The fact that it was a game was the best part- it wasn't stressful or demanding, which makes it better than normal classwork.                     | It was way too complicated to learn how to play. This simple fact alone would turn most people away from it before it even got started.                                                                                                                                                                       | Nope- overall, the design was good and the game was fun.                                                               |
|                   |                                                                                                                                                   |                                                                                                                                                                                                                                                                                                               |                                                                                                                        |
|                   |                                                                                                                                                   |                                                                                                                                                                                                                                                                                                               |                                                                                                                        |
|                   |                                                                                                                                                   |                                                                                                                                                                                                                                                                                                               |                                                                                                                        |
|                   |                                                                                                                                                   |                                                                                                                                                                                                                                                                                                               |                                                                                                                        |
|                   |                                                                                                                                                   |                                                                                                                                                                                                                                                                                                               |                                                                                                                        |
|                   |                                                                                                                                                   |                                                                                                                                                                                                                                                                                                               |                                                                                                                        |
| Agree             | It's fun interactive way to learn how organisms mutate and survive climate change.                                                                | I wish there was more strategizing and science involved.                                                                                                                                                                                                                                                      |                                                                                                                        |
| Strongly agree    | I liked the fact that we could stack organisms and add and take away algae at the end/beginning of a round.                                       | The instructions were a little complicated. We definitely didn't play 100% correctly.                                                                                                                                                                                                                         | The pre-lab portion was not given/ told to us to do before the game so it was hard to fill out after playing the game. |
| Strongly agree    |                                                                                                                                                   |                                                                                                                                                                                                                                                                                                               |                                                                                                                        |

|                |                                                                                                                                                                                                                                                                                                                                                                                                  |                                                                                                                                                                                                                                                                                                                                                                                                                                                                                                                                                             |                                                                                                                                                                                                                                                                                                                                                                                                                                                                                                                                                                                                                                                                                                     |
|----------------|--------------------------------------------------------------------------------------------------------------------------------------------------------------------------------------------------------------------------------------------------------------------------------------------------------------------------------------------------------------------------------------------------|-------------------------------------------------------------------------------------------------------------------------------------------------------------------------------------------------------------------------------------------------------------------------------------------------------------------------------------------------------------------------------------------------------------------------------------------------------------------------------------------------------------------------------------------------------------|-----------------------------------------------------------------------------------------------------------------------------------------------------------------------------------------------------------------------------------------------------------------------------------------------------------------------------------------------------------------------------------------------------------------------------------------------------------------------------------------------------------------------------------------------------------------------------------------------------------------------------------------------------------------------------------------------------|
| Agree          | I liked the way it teaches you the mechanisms of ecology through acting them out yourself.                                                                                                                                                                                                                                                                                                       | So many game pieces!                                                                                                                                                                                                                                                                                                                                                                                                                                                                                                                                        | I love the idea, and enjoyed playing. A bit more tweaking in the game's rules to accurately reflect how organisms are distributed through different depths would make it more educational at very little cost to gameplay.                                                                                                                                                                                                                                                                                                                                                                                                                                                                          |
| Agree          | I liked learning in alternative methods rather than just reading and interpreting things over and over                                                                                                                                                                                                                                                                                           | The game seemed a little overdrawn/complicated                                                                                                                                                                                                                                                                                                                                                                                                                                                                                                              | Maybe not using as many mutations and organisms I think a smaller sample size would help greatly                                                                                                                                                                                                                                                                                                                                                                                                                                                                                                                                                                                                    |
| Strongly agree | Having to make a strategy to win.                                                                                                                                                                                                                                                                                                                                                                | Too many pieces                                                                                                                                                                                                                                                                                                                                                                                                                                                                                                                                             | no                                                                                                                                                                                                                                                                                                                                                                                                                                                                                                                                                                                                                                                                                                  |
| Strongly agree | Building my initial reef                                                                                                                                                                                                                                                                                                                                                                         | The disasters are a bit too much and too often. Not enough mutations.                                                                                                                                                                                                                                                                                                                                                                                                                                                                                       |                                                                                                                                                                                                                                                                                                                                                                                                                                                                                                                                                                                                                                                                                                     |
| Neutral        |                                                                                                                                                                                                                                                                                                                                                                                                  |                                                                                                                                                                                                                                                                                                                                                                                                                                                                                                                                                             |                                                                                                                                                                                                                                                                                                                                                                                                                                                                                                                                                                                                                                                                                                     |
| Agree          | What I liked most was how we could see mutations spread across offspring of other organisms.                                                                                                                                                                                                                                                                                                     | The wasn't really anything I didn't like                                                                                                                                                                                                                                                                                                                                                                                                                                                                                                                    | N/A                                                                                                                                                                                                                                                                                                                                                                                                                                                                                                                                                                                                                                                                                                 |
| Strongly agree | I liked how this game allowed us to be competitive and still learn about marine communities. We were able to create our own reefs based off of prior and new knowledge allowing for strategy to be a key factor in how successful we were. The ability to bounce ideas off of one another while playing this game allowed for us to expand our knowledge through collaboration while having fun. | Having three separate areas that contain information about the reef builders and dwellers was a little overwhelming as well as confusing at some points. I would combine all of this information into one graph so it is easier for players to access and understand while they are playing the game. I would also simplify the directions. We noticed while playing the board game that the directions did not line up between what was next to the board and what was located on the laminated paper provided to us that stayed next to our reef diagram. | It is a great game to use for educational purposes as well as possibly a game for the family or friends.                                                                                                                                                                                                                                                                                                                                                                                                                                                                                                                                                                                            |
|                |                                                                                                                                                                                                                                                                                                                                                                                                  |                                                                                                                                                                                                                                                                                                                                                                                                                                                                                                                                                             |                                                                                                                                                                                                                                                                                                                                                                                                                                                                                                                                                                                                                                                                                                     |
|                |                                                                                                                                                                                                                                                                                                                                                                                                  |                                                                                                                                                                                                                                                                                                                                                                                                                                                                                                                                                             |                                                                                                                                                                                                                                                                                                                                                                                                                                                                                                                                                                                                                                                                                                     |
|                |                                                                                                                                                                                                                                                                                                                                                                                                  |                                                                                                                                                                                                                                                                                                                                                                                                                                                                                                                                                             |                                                                                                                                                                                                                                                                                                                                                                                                                                                                                                                                                                                                                                                                                                     |
|                |                                                                                                                                                                                                                                                                                                                                                                                                  |                                                                                                                                                                                                                                                                                                                                                                                                                                                                                                                                                             |                                                                                                                                                                                                                                                                                                                                                                                                                                                                                                                                                                                                                                                                                                     |
|                |                                                                                                                                                                                                                                                                                                                                                                                                  |                                                                                                                                                                                                                                                                                                                                                                                                                                                                                                                                                             |                                                                                                                                                                                                                                                                                                                                                                                                                                                                                                                                                                                                                                                                                                     |
| Neutral        | Learning about the different reef builders                                                                                                                                                                                                                                                                                                                                                       | Game set up and understanding took to long                                                                                                                                                                                                                                                                                                                                                                                                                                                                                                                  |                                                                                                                                                                                                                                                                                                                                                                                                                                                                                                                                                                                                                                                                                                     |
| Agree          | The game boards were interesting, and the general concept seemed well thought out.                                                                                                                                                                                                                                                                                                               | Too many pieces, might consider a virtual version, probably make it more enjoyable. Overall, took too long just to set up the game.                                                                                                                                                                                                                                                                                                                                                                                                                         | Interesting concept but very hard to follow, if its meant to be fun then it should be more simple. I got the impression the point of the game was to make you realize you go through a lot of work to put things together and then they can get destroyed very quickly which was irritating but makes you think. Seems to be geared toward people who know a lot of conservation biology, if that's the target audience then I'd say its hit its mark. But if this game is supposed to be a learning tool for students or a more general audience then it needs to be simplified. Struggle is part of the game experience, but if you're not having fun while doing it then it defeats the purpose. |

|                       |                                                                                                                                                                                                                                                                                                   |                                                                                                                                                                                                                                                                                                                                                            |                                                                                                                                                                                                                                                                                                                                                                                                     |
|-----------------------|---------------------------------------------------------------------------------------------------------------------------------------------------------------------------------------------------------------------------------------------------------------------------------------------------|------------------------------------------------------------------------------------------------------------------------------------------------------------------------------------------------------------------------------------------------------------------------------------------------------------------------------------------------------------|-----------------------------------------------------------------------------------------------------------------------------------------------------------------------------------------------------------------------------------------------------------------------------------------------------------------------------------------------------------------------------------------------------|
| Agree                 | I'm a competitive person so this game inspired me to pay more attention so I could win.                                                                                                                                                                                                           | Getting soot all over my fingers and having to find lots of little pieces each time the juveniles spawned.                                                                                                                                                                                                                                                 | The disaster cards should be more clear that you only draw one for the whole group rather than everyone drawing their own disaster. The instruction cheat sheet could be clearer/more concise. There is also a typo on the cheat sheet.                                                                                                                                                             |
| Agree, Strongly agree | I enjoyed the visualization in the game and how it helped you in understanding what each term was and what they did. I liked most about the game how it got you to collaborate with your classmates and added a little competition to the course.                                                 | The instructions about the game were a little unclear. For example, our class didn't understand the natural disaster part of the game so each of us chose our own disaster rather than using one for the whole class. There were a lot of pieces you needed to keep track of. The instructions also were a bit confusing and had a learning curve to them. | It might be a little easier to understand with less moving parts in the game. Maybe scale down on the amount of pieces until there is a deeper understanding for the game. It was very well thought out but I would include specific instructions in how many people use which cards. Our class ended up playing incorrectly by giving every player a different card when it came to the disasters. |
| Agree                 | I loved how much it taught me! The game was very educational and made me want to research more about coral reefs.                                                                                                                                                                                 | All the small parts made things cumbersome. Especially when filling out the nursery with all your reef builders and mutations.                                                                                                                                                                                                                             | I think this game would be much easier to play if online rather than the physical version. Also our group did not realize that a disaster card(s) should apply to the entire game and not just the person who drew the card, so clarifying things like that would be helpful.                                                                                                                       |
| Agree                 | I liked that there were a variety of reef builders to choose from and that they all had unique strengths/weaknesses. It was interesting to see how each one did whenever we had a "catastrophe" hit. It also taught me a lot about the various types of corals, sponges, etc. that live in reefs. | All of the tiny little pieces. I feel like a lot of time was wasted looking for the right coral or mutation whenever we would start a new round.                                                                                                                                                                                                           | Creating some kind of piece dispenser that all the pieces could be placed in easily for more efficient game play                                                                                                                                                                                                                                                                                    |
| Agree                 | I liked the amount of choices I was able to pick from                                                                                                                                                                                                                                             | The directions were kind of confusing if its your first time playing                                                                                                                                                                                                                                                                                       | Make the different reefs have different shapes so that it is easier to indicate                                                                                                                                                                                                                                                                                                                     |
| Neutral               | The overall concept was fun and I enjoyed the gameplay                                                                                                                                                                                                                                            | The instructions were complicated and the amount of pieces that needed to be located/taken out of bags/placed etc took up most of the gameplay time                                                                                                                                                                                                        |                                                                                                                                                                                                                                                                                                                                                                                                     |
| Neutral               | The randomness of the short term and long term disaster. The one where you have to take 2 disasters at once was perfect!                                                                                                                                                                          | How much knowledge you need on individual organisms and reef builders.                                                                                                                                                                                                                                                                                     | Maybe requiring less specific knowledge for each individual element would help make the game more easy for everyone to play.                                                                                                                                                                                                                                                                        |
| Strongly agree        |                                                                                                                                                                                                                                                                                                   |                                                                                                                                                                                                                                                                                                                                                            |                                                                                                                                                                                                                                                                                                                                                                                                     |
| Agree                 | The mutation mechanic                                                                                                                                                                                                                                                                             | How long the rounds last, and having to keep track of a lot of things all at once                                                                                                                                                                                                                                                                          |                                                                                                                                                                                                                                                                                                                                                                                                     |
| Strongly agree        | I loved the ability to strategize & trade with the other team. it lead to lots of funny "business transactions" and good laughs!                                                                                                                                                                  | The rules on paper are very confusing. I found the prelab to be more confusing than not. Once I started playing the game, it all made a lot more sense and was quite fun!                                                                                                                                                                                  | Nope! keep making fun games                                                                                                                                                                                                                                                                                                                                                                         |
| Agree                 | Working with a team mate                                                                                                                                                                                                                                                                          | The confusing rules                                                                                                                                                                                                                                                                                                                                        | Be more precise regarding the rules                                                                                                                                                                                                                                                                                                                                                                 |
| Neutral               | The variety of boards                                                                                                                                                                                                                                                                             | The rules                                                                                                                                                                                                                                                                                                                                                  | No                                                                                                                                                                                                                                                                                                                                                                                                  |
| Agree                 | I liked that the evolution was random (aka you had to roll the dice).                                                                                                                                                                                                                             | How quickly the board became covered in fleshly algae, but I'm not sure if that's the intent of the game.                                                                                                                                                                                                                                                  |                                                                                                                                                                                                                                                                                                                                                                                                     |
| Disagree              | Competing with my classmates                                                                                                                                                                                                                                                                      | The objective seemed to be pushing too much of the "educational" part making the game not as fun.                                                                                                                                                                                                                                                          | I like the idea of a game about building reefs but this was not how I would imagine that game                                                                                                                                                                                                                                                                                                       |



[illegible]

|                   |                                                                                                                                                               |                                                                                                                                                                                                                                                                                                                                                                                                                |                                                                                                                                 |
|-------------------|---------------------------------------------------------------------------------------------------------------------------------------------------------------|----------------------------------------------------------------------------------------------------------------------------------------------------------------------------------------------------------------------------------------------------------------------------------------------------------------------------------------------------------------------------------------------------------------|---------------------------------------------------------------------------------------------------------------------------------|
|                   |                                                                                                                                                               |                                                                                                                                                                                                                                                                                                                                                                                                                |                                                                                                                                 |
|                   |                                                                                                                                                               |                                                                                                                                                                                                                                                                                                                                                                                                                |                                                                                                                                 |
| Strongly agree    | When my organisms would survive a catastrophe.                                                                                                                | When my organisms did not survive the catastrophes.                                                                                                                                                                                                                                                                                                                                                            | No                                                                                                                              |
| Strongly agree    | I love being able to play a fun and interactive game while still learning about Reefs, mutations, and migrations.                                             | Adding more corals to the list of reef builders that can be played with. Mostly ones that are carbonate organisms.                                                                                                                                                                                                                                                                                             | More guidance about how to score the board after each round.                                                                    |
| Strongly agree    | I enjoyed the mutations and catastrophe portions of the game, as they were more unpredictable and made the most changes to the reef.                          | The amount of time it took, especially at later rounds, to spawn in and add juveniles to the reef. We ended up with a lot of more offspring mutations which overflowed our board and took a lot longer to add to the nursery, so possibly adding a restriction to the total number of juveniles per round or allowing a choice to spawn more than one offspring if you have multiple more offspring mutations. |                                                                                                                                 |
| Strongly disagree | Competing with other groups to win.                                                                                                                           | Scoring and the board pieces. There are too many pieces to count and keep track of so it's very easy to make scoring mistakes. It also just takes a long time to score. The board pieces get messy adding and stacking all of the different reef builders, dwellers, and mutations.                                                                                                                            | This game would be better as a computer simulation rather than a physical board game.                                           |
| Agree             | I liked having a visual representation of the reef over millions of years and seeing how easily things could change when disasters happened                   | I found it a little too complex - it got easier to understand after playing it for a bit but at first the number of directions was pretty overwhelming                                                                                                                                                                                                                                                         |                                                                                                                                 |
| Strongly agree    | I enjoyed strategizing with my teammates the most. If one of us missed something that would help us win, another member would notice it.                      | How slow we went. I don't doubt that playing a second time would improve game speed, but it still took a lot of time to get the hang of the game.                                                                                                                                                                                                                                                              | N/a, fun game                                                                                                                   |
| Strongly agree    | I liked how there was cooperative and competitive play. I think the total gameplay was fun and educational.                                                   | I think some of the setup and rules are a little vague and can be interpreted in different ways. Most of the mutations end up having little to no effect on survival because you run out of space and time to have a proper long term strategy.                                                                                                                                                                |                                                                                                                                 |
| Strongly agree    | I liked the ability to choose the organisms in your reef and build it from the ground up, trading was also a nice option so we could get more reef diversity. | The game is a bit complex but as we played more it became easier to understand.                                                                                                                                                                                                                                                                                                                                |                                                                                                                                 |
| Strongly agree    | I liked the strategy element the most as well as the rounds building on each other.                                                                           | The scoring was very confusing for my team at first and we were unsure whether to put the attribute tokens that the reef builders started out with on the board (ex. does boulder coral start with a strong arm token or not)                                                                                                                                                                                  | There were some parts of the instructions where an organism's use in a reef was made clear, but their role in the game was not. |
| Strongly agree    | I like the strategic component of it. It makes it fun while learning the material.                                                                            | I found the game quite perfect honestly. I do not think there is need for improvement anywhere. The only thing I could add is that the stacking system is a little much for the size of the board. A bigger board with bigger square to have more space for stacking would be better.                                                                                                                          | There is nothing that I can think of to add.                                                                                    |
| Strongly agree    | the team collaboration                                                                                                                                        | the long term disasters                                                                                                                                                                                                                                                                                                                                                                                        | the point system could possibly be simplified                                                                                   |
| Strongly agree    | I learned a lot more about reef builders playing the game than I ever would have.                                                                             | It was a bit confusing at first.                                                                                                                                                                                                                                                                                                                                                                               |                                                                                                                                 |
| Agree             | I liked collaborating with my classmates.                                                                                                                     | It was hard to understand at first, but I wouldn't say this made me dislike the game.                                                                                                                                                                                                                                                                                                                          |                                                                                                                                 |
|                   |                                                                                                                                                               |                                                                                                                                                                                                                                                                                                                                                                                                                |                                                                                                                                 |

|                   |                                                                                                                                                                                                                                                                                                                                                |                                                                                                                                                                                                                                                                                                                                                           |                                                                                                                                                                                                                                                                                                                                                                                                                                                                                                                                                    |
|-------------------|------------------------------------------------------------------------------------------------------------------------------------------------------------------------------------------------------------------------------------------------------------------------------------------------------------------------------------------------|-----------------------------------------------------------------------------------------------------------------------------------------------------------------------------------------------------------------------------------------------------------------------------------------------------------------------------------------------------------|----------------------------------------------------------------------------------------------------------------------------------------------------------------------------------------------------------------------------------------------------------------------------------------------------------------------------------------------------------------------------------------------------------------------------------------------------------------------------------------------------------------------------------------------------|
|                   |                                                                                                                                                                                                                                                                                                                                                |                                                                                                                                                                                                                                                                                                                                                           |                                                                                                                                                                                                                                                                                                                                                                                                                                                                                                                                                    |
|                   |                                                                                                                                                                                                                                                                                                                                                |                                                                                                                                                                                                                                                                                                                                                           |                                                                                                                                                                                                                                                                                                                                                                                                                                                                                                                                                    |
|                   |                                                                                                                                                                                                                                                                                                                                                |                                                                                                                                                                                                                                                                                                                                                           |                                                                                                                                                                                                                                                                                                                                                                                                                                                                                                                                                    |
|                   |                                                                                                                                                                                                                                                                                                                                                |                                                                                                                                                                                                                                                                                                                                                           |                                                                                                                                                                                                                                                                                                                                                                                                                                                                                                                                                    |
|                   |                                                                                                                                                                                                                                                                                                                                                |                                                                                                                                                                                                                                                                                                                                                           |                                                                                                                                                                                                                                                                                                                                                                                                                                                                                                                                                    |
| Agree             | I enjoyed the strategy of trading to collect new species and mutations.                                                                                                                                                                                                                                                                        | The little markers for mutations are clunky - it's time consuming to collect and assign them each round, and they're easy to knock off the board and lose.                                                                                                                                                                                                | While I like the images of the individual corals on the game pieces, it would be much more streamlined to play (and understand) if the pieces were more simple and color coded to type (encrusting, skeleton-building, etc.)<br><br>Also, a few of the rules are somewhat unclear - examples of gameplay would be helpful.                                                                                                                                                                                                                         |
| Strongly agree    | I like the fact that it is round based and not turn based.                                                                                                                                                                                                                                                                                     | The mutation system is extremely unwieldy in later rounds.                                                                                                                                                                                                                                                                                                | A revision of the mutation system would allow for an improvement of play speed. I am not sure what form this would take, but would need to limit the usage of small chips that are difficult to gather, move, and apply.                                                                                                                                                                                                                                                                                                                           |
| Neutral           | Having a game that has science in it. I learned how different the coral species are, and how they could be affected by different scenarios. Moreover, it was fun to trade and talk how each of our coral system got affected by the catastrophe. It is a mixture of dice-board game and card game, which makes it more thrilling and exciting. | It takes a lot of time to play each round. Stacking cards in a small board and too many cards makes it complicated.                                                                                                                                                                                                                                       | I would redesign this game in such a way that the coral builders, dwellers, and reef coverers will be given as cards and each of the group members will get random sets of combinations of species labelled with mutations and depth. They will choose scenarios through cards stacked in the middle and have to surrender the cards that die in that catastrophe. Rolling of dice can get you an additional card(s) they can choose from the set. Also, the rule of trade, exchange will be kept, and the one with more cards will be the winner. |
| Strongly disagree | Variety of information available to learn                                                                                                                                                                                                                                                                                                      | Way too difficult of gameplay                                                                                                                                                                                                                                                                                                                             | Just because you can include so much science and variation doesn't mean you should for a game. If it was simplified (maybe a few less species of builders and quite a few less mutations) it could be fun. I was focused more on playing the game right than actually learning anything.                                                                                                                                                                                                                                                           |
| Neutral           | I enjoyed the strategizing and trying to anticipate a disaster in order to maintain a community                                                                                                                                                                                                                                                | the online version is very tedious. The need to continually copy, paste and maneuver small boxes is difficult, especially on a small screen. You also have to remember a lot of what you have, especially if you try to incorporate "stacking" - which is also difficult to do if you are not double checking the "layer" that particular image is based. |                                                                                                                                                                                                                                                                                                                                                                                                                                                                                                                                                    |
| Disagree          | In theory the game does a good job of illustrating the complexity of how random mutations and variable environments change communities over time.                                                                                                                                                                                              | There are a lot of moving pieces to the game. We spent a lot of time looking for the pieces we needed. One player had fecund coral and had a lot of pieces to decide what to do with.                                                                                                                                                                     | Some rules are confusing and not universal, such as what to do with coral stacks, so we spend a lot of time reviewing the rules.                                                                                                                                                                                                                                                                                                                                                                                                                   |
| Neutral           | It was fun to strategize about which reef builders to choose and where to put them. And of course the catastrophes!                                                                                                                                                                                                                            | Calculating the score each round. Perhaps one side of the tiles could be the picture and the other could be a simplified color (red, blue, yellow, etc) and the point value. Then you could just count the different colors and add up the points.                                                                                                        | Make note if the mutation doesn't continue on to the next generation. There is only 1 sentence about increased reproductive success not being passed on (on page 11). Add to the mutations definitions on page 21.<br>Stacking directions and confusing (taking them on and off the board). Why not just leave the tiles on the board (if there are enough tiles)? If all available tiles are stacked, no offspring could settle anyway.                                                                                                           |
| Strongly agree    | It helped learn characteristics about types of coral                                                                                                                                                                                                                                                                                           | There were too many different pieces and they were hard to keep organized                                                                                                                                                                                                                                                                                 |                                                                                                                                                                                                                                                                                                                                                                                                                                                                                                                                                    |

|                   |                                                                                                                                                                                                                                                                                                                                                                                                         |                                                                                                                                                                                                                                                                                                                                                                                                                                                                                                                                                                                                     |                                                                                                                                                                                                                                                                                                                                                                                                                                                                                                                                                                                                                                                                                                                                                                                                                                                                                                                                                                                                                                                                                                                                                                                                                                                                                                                                                                                                                                                                                                                                                                                                                                                                                                                                                                                                                                                                                                                                                                                                                                                                                                                                                                                                                                                                                                                                                                                                                                                                                                |
|-------------------|---------------------------------------------------------------------------------------------------------------------------------------------------------------------------------------------------------------------------------------------------------------------------------------------------------------------------------------------------------------------------------------------------------|-----------------------------------------------------------------------------------------------------------------------------------------------------------------------------------------------------------------------------------------------------------------------------------------------------------------------------------------------------------------------------------------------------------------------------------------------------------------------------------------------------------------------------------------------------------------------------------------------------|------------------------------------------------------------------------------------------------------------------------------------------------------------------------------------------------------------------------------------------------------------------------------------------------------------------------------------------------------------------------------------------------------------------------------------------------------------------------------------------------------------------------------------------------------------------------------------------------------------------------------------------------------------------------------------------------------------------------------------------------------------------------------------------------------------------------------------------------------------------------------------------------------------------------------------------------------------------------------------------------------------------------------------------------------------------------------------------------------------------------------------------------------------------------------------------------------------------------------------------------------------------------------------------------------------------------------------------------------------------------------------------------------------------------------------------------------------------------------------------------------------------------------------------------------------------------------------------------------------------------------------------------------------------------------------------------------------------------------------------------------------------------------------------------------------------------------------------------------------------------------------------------------------------------------------------------------------------------------------------------------------------------------------------------------------------------------------------------------------------------------------------------------------------------------------------------------------------------------------------------------------------------------------------------------------------------------------------------------------------------------------------------------------------------------------------------------------------------------------------------|
| Neutral           | The concept is fun and playing with classmates was enjoyable.                                                                                                                                                                                                                                                                                                                                           | The online version was very finicky, it was difficult to select and move the correct pieces which took up a lot of time and patience. Moving all the pieces, including the mutations, with a mouse one by one for each step was frustrating and took up most of our time. It was also difficult to see which pieces were which because they were tiny and there wasn't enough space on each tile to see all the pieces at a glance. The directions were very long and the game was quite complex, I think it could be simplified while still keeping the general concepts/learning points the same. |                                                                                                                                                                                                                                                                                                                                                                                                                                                                                                                                                                                                                                                                                                                                                                                                                                                                                                                                                                                                                                                                                                                                                                                                                                                                                                                                                                                                                                                                                                                                                                                                                                                                                                                                                                                                                                                                                                                                                                                                                                                                                                                                                                                                                                                                                                                                                                                                                                                                                                |
| Strongly agree    | I liked the level of mechanical complexity - I think it was good for simulating the different systems at play and also was an engaging level of strategic play to chew on. The conceit of trading larvae between players due to their planktonic life stage migration ability was really fun and clever. The scoresheet having the point calculations in the headers of each column was also essential. | Piece management became really complicated really quickly. We were discussing during class that a monopoly tray or a tacklebox for the different pieces would make playing the game much easier. There was some confusion as to whether stacked pieces counted toward total number of organisms on the reef, since they were specifically mentioned on the quick start rules when tallying up species diversity, but not for total population.                                                                                                                                                      | For the two disaster decks, you could maybe print the long and short-term disasters with labels on the backs to better distinguish the two decks. Or a playmat of some kind with spots for the decks. I think the game either requires a "banker" role to keep track of the pieces when it comes time to move them to different boards. Also the amount of time each round takes balloons the more people you have and more organisms you have. We had one player roll 3 fecundity mutations in a row and her board just exploded into boulder corals.<br>1) Reef Survivor is a fun game: Yes, I think the mechanics and strategy were engaging. I think I would have to play the game through twice to properly internalize everything and right now I think I have mostly learned how to play the game – it would take time and some more chewing over of the material for it to transfer from “game logic” to “this is how reefs work.” Honestly answering this questionnaire has already helped in that regard.<br>2) Game rules definitely require hands on application to fully grasp and the actual straightforwardness is highly dependent on “have you played this kind of game before”. But I think that’s mostly because the system you are replicating is complex so you end up with an almost Euro-game level number of pieces and moving parts. That complexity can make it less fun so some way to help with the onboarding is necessary - either a trial run, or somebody in your group who’s helping to walk people through.<br>3) I would want to try this with some of my board game friends – dunno how much onboarding it would take for people who don’t regularly play board games of this level of mechanical complexity.<br>4) I think the game mechanics make for a very practical model of reef population dynamics over time.<br>5) In terms of learning the material, having an accompanying lecture/followup debrief would probably be best for material learning and retention. You can understand how the game works but maybe not grasp the systems it is modelling. My group had two international students whose backgrounds were in physical oceanography, and while I can’t speak for their learning experience, they had a harder time keeping up with the rules from round to round. So having prior board game experience *and* biological experience is either necessary to play well or gives you an advantage when you play it cold the first time. |
| Agree             | Easiest way to understand the reef system and the builders.<br>The photos are really helpful to understand the species.                                                                                                                                                                                                                                                                                 | It took some time to understand the rules of the game                                                                                                                                                                                                                                                                                                                                                                                                                                                                                                                                               |                                                                                                                                                                                                                                                                                                                                                                                                                                                                                                                                                                                                                                                                                                                                                                                                                                                                                                                                                                                                                                                                                                                                                                                                                                                                                                                                                                                                                                                                                                                                                                                                                                                                                                                                                                                                                                                                                                                                                                                                                                                                                                                                                                                                                                                                                                                                                                                                                                                                                                |
|                   |                                                                                                                                                                                                                                                                                                                                                                                                         |                                                                                                                                                                                                                                                                                                                                                                                                                                                                                                                                                                                                     |                                                                                                                                                                                                                                                                                                                                                                                                                                                                                                                                                                                                                                                                                                                                                                                                                                                                                                                                                                                                                                                                                                                                                                                                                                                                                                                                                                                                                                                                                                                                                                                                                                                                                                                                                                                                                                                                                                                                                                                                                                                                                                                                                                                                                                                                                                                                                                                                                                                                                                |
| Agree             |                                                                                                                                                                                                                                                                                                                                                                                                         |                                                                                                                                                                                                                                                                                                                                                                                                                                                                                                                                                                                                     |                                                                                                                                                                                                                                                                                                                                                                                                                                                                                                                                                                                                                                                                                                                                                                                                                                                                                                                                                                                                                                                                                                                                                                                                                                                                                                                                                                                                                                                                                                                                                                                                                                                                                                                                                                                                                                                                                                                                                                                                                                                                                                                                                                                                                                                                                                                                                                                                                                                                                                |
| Strongly disagree | The diversity of reef builders was interesting and their different traits’ effects on gameplay added a layer of depth to the game rather than them just being random.                                                                                                                                                                                                                                   | If you haven't played the game before or spent time reading every card it can be nearly impossible to properly strategize, which decreases enjoyment.                                                                                                                                                                                                                                                                                                                                                                                                                                               | The game could stand to have more interaction between players other than one round of trading to make it feel more competitive and to engage the players.                                                                                                                                                                                                                                                                                                                                                                                                                                                                                                                                                                                                                                                                                                                                                                                                                                                                                                                                                                                                                                                                                                                                                                                                                                                                                                                                                                                                                                                                                                                                                                                                                                                                                                                                                                                                                                                                                                                                                                                                                                                                                                                                                                                                                                                                                                                                      |
| Neutral           | I won.                                                                                                                                                                                                                                                                                                                                                                                                  | The math involved.                                                                                                                                                                                                                                                                                                                                                                                                                                                                                                                                                                                  | The atoll was a terrible map that ruined one player's game. Is it realistic?                                                                                                                                                                                                                                                                                                                                                                                                                                                                                                                                                                                                                                                                                                                                                                                                                                                                                                                                                                                                                                                                                                                                                                                                                                                                                                                                                                                                                                                                                                                                                                                                                                                                                                                                                                                                                                                                                                                                                                                                                                                                                                                                                                                                                                                                                                                                                                                                                   |

|                       |                                                                                                                                                                                                                                                                                                                                                                        |                                                                                                                                                                                                                                                                                                                                                                                                                                                                                                                                                                                                                                                       |                                                                                                                                                                                                                                                                                                                                                                                                                                                                                                                                                                                                                                                                    |
|-----------------------|------------------------------------------------------------------------------------------------------------------------------------------------------------------------------------------------------------------------------------------------------------------------------------------------------------------------------------------------------------------------|-------------------------------------------------------------------------------------------------------------------------------------------------------------------------------------------------------------------------------------------------------------------------------------------------------------------------------------------------------------------------------------------------------------------------------------------------------------------------------------------------------------------------------------------------------------------------------------------------------------------------------------------------------|--------------------------------------------------------------------------------------------------------------------------------------------------------------------------------------------------------------------------------------------------------------------------------------------------------------------------------------------------------------------------------------------------------------------------------------------------------------------------------------------------------------------------------------------------------------------------------------------------------------------------------------------------------------------|
| Agree                 | The reef building mechanics were entertaining, and I liked rolling for mutations. It added an extra layer of random to get the drop on your opponents.                                                                                                                                                                                                                 | Taking all the little mutation pieces out of the bag and marking them down on the reef builders then having all of those be added to the nursery WITH mutations and oh I got a few mutations that doubled reproduction so now I need new juveniles with mutations and--you get the picture. It became very hard to manage at a certain point and I kept losing the pieces. Also some of the disasters had strange wording, I wish they were more specific because at some points we just guessed (ex, glacial long term disaster, do the organisms return after the one round? Is the shallows now unable to hold organisms prior to the one round?). |                                                                                                                                                                                                                                                                                                                                                                                                                                                                                                                                                                                                                                                                    |
| Strongly agree        | I liked how the disasters affected the reefs we built up in various and unexpected ways that would either wipe out the organisms we amassed or left them in more or less the same condition. Despite our best planning, the disaster events had us with our fingers crossed hoping that we would be spared from a catastrophe which I found enjoyable and educational. | The instructions were a little hard to follow at first with some rules being a bit too ambiguous, more straightforward instructions would surely improve the game.                                                                                                                                                                                                                                                                                                                                                                                                                                                                                    | I have nothing more to add.                                                                                                                                                                                                                                                                                                                                                                                                                                                                                                                                                                                                                                        |
| Neutral               | The design of the pieces and quality of the board was great.                                                                                                                                                                                                                                                                                                           | The instructions need some flushing out, potentially including example scenarios or more descriptive house rules.                                                                                                                                                                                                                                                                                                                                                                                                                                                                                                                                     |                                                                                                                                                                                                                                                                                                                                                                                                                                                                                                                                                                                                                                                                    |
| Agree                 | Personally I found the game to help visualize and see properties of a reef in motion which helped cement knowledge I had already seen and learned in class. Gameplay wise my favorite part of the game was rolling for mutations and seeing the random factors that may impact our reefs.                                                                              | I noticed a lot of various sponges and corals with similar repeated stats which could be an opportunity to add more strategic options to base stats. On this topic reef dwellers could be paired with particular reef builders for another buff as an interesting gameplay mechanic.                                                                                                                                                                                                                                                                                                                                                                  | I actually really enjoyed the randomness aspect for light hearted play. however, I imagine for a game that wants to add strategy randomness is hard to balance without some ways to counter. There were a lot of times where the only strategy I saw was to diversify and spread out across the various depths but many times the board I chose (Atoll) got the shallows wiped out regardless of mutations or present reef builders because I didn't have a land. Gameplay wise I am unsure how to balance the science with gameplay.                                                                                                                              |
| Strongly agree        | What I liked most about the game was the different types of board set ups you could choose from and the different information about the reef builders, and the mutations that the reef builders could get.                                                                                                                                                             | Some of the rules were a little confusing/vague. The time for the reef dwellers to eat the fleshy algae wasn't really defined so my group and I kind of just floundered over it.                                                                                                                                                                                                                                                                                                                                                                                                                                                                      |                                                                                                                                                                                                                                                                                                                                                                                                                                                                                                                                                                                                                                                                    |
| Strongly disagree     |                                                                                                                                                                                                                                                                                                                                                                        |                                                                                                                                                                                                                                                                                                                                                                                                                                                                                                                                                                                                                                                       | I saw this as a game. I didn't really see any learning opportunities. It was just a time to sit down and interact with peers unfortunately, and go through a few steps in a game. I think that it would have been more interesting if there was some scientific component to it. The concepts that we covered seemed more suitable for a middle school or maybe a high school science class. Please don't let that seem too negative! So much effort clearly went into this and I am very impressed by the layout and concepts covered in it. I just think that it needs to be much more challenging and perhaps it is not for an upper level undergraduate class. |
| Strongly agree, Agree | The way you can strategize to make certain reef dwellers for every situation, I liked how it represented several reef communities                                                                                                                                                                                                                                      | I didn't like the way the algae worked                                                                                                                                                                                                                                                                                                                                                                                                                                                                                                                                                                                                                | The game was really fun and entertaining                                                                                                                                                                                                                                                                                                                                                                                                                                                                                                                                                                                                                           |
| Agree                 | I liked the competitiveness and complexity.                                                                                                                                                                                                                                                                                                                            | Some of the instructions were a little confusing.                                                                                                                                                                                                                                                                                                                                                                                                                                                                                                                                                                                                     | you should make a game similar to D&D with a science focus too, after you finish working on the reef game!                                                                                                                                                                                                                                                                                                                                                                                                                                                                                                                                                         |
| Strongly agree        | I liked collaborating with my classmates                                                                                                                                                                                                                                                                                                                               | Some of the instructions were tedious, and I wish I understood exactly why my environment won the game.                                                                                                                                                                                                                                                                                                                                                                                                                                                                                                                                               |                                                                                                                                                                                                                                                                                                                                                                                                                                                                                                                                                                                                                                                                    |
| Disagree              | it taught me something new                                                                                                                                                                                                                                                                                                                                             | it was not very engaging                                                                                                                                                                                                                                                                                                                                                                                                                                                                                                                                                                                                                              | n/a                                                                                                                                                                                                                                                                                                                                                                                                                                                                                                                                                                                                                                                                |

[illegible]

|                |                                                                                                                                                                                                                                                                                   |                                                                                                                                                                                                                                                                                                                                                                                                                      |                                                                                                                                                                                                                                                                                                                                                                                                                                                                                                                                                                                       |
|----------------|-----------------------------------------------------------------------------------------------------------------------------------------------------------------------------------------------------------------------------------------------------------------------------------|----------------------------------------------------------------------------------------------------------------------------------------------------------------------------------------------------------------------------------------------------------------------------------------------------------------------------------------------------------------------------------------------------------------------|---------------------------------------------------------------------------------------------------------------------------------------------------------------------------------------------------------------------------------------------------------------------------------------------------------------------------------------------------------------------------------------------------------------------------------------------------------------------------------------------------------------------------------------------------------------------------------------|
|                |                                                                                                                                                                                                                                                                                   |                                                                                                                                                                                                                                                                                                                                                                                                                      |                                                                                                                                                                                                                                                                                                                                                                                                                                                                                                                                                                                       |
|                |                                                                                                                                                                                                                                                                                   |                                                                                                                                                                                                                                                                                                                                                                                                                      |                                                                                                                                                                                                                                                                                                                                                                                                                                                                                                                                                                                       |
| Agree          | I really enjoyed the strategizing, and level of thought that I had to put in when determining which board I wanted to use and where I wanted to place my reef builders, as well as which specific reef builders I wanted to risk mutating, as the mutations could be bad or good. | I really thought the process of counting up all the points at the end of each round ground the whole game to a halt. I understand that being a competitive game the points at the end of each round must be tallied up but every single time we got to the counting part it was always an "ok lets get this over with" response, there really wasn't much excitement to finding out how well or badly we were doing. | I think that the dwellers were not very useful, since they are only able to remove 1 piece of fleshy algae per turn and every turn 5 algae was added, so most times we didn't even bother removing algae as we were just gonna add more to the board at the next step of the game. I also think that the lack of special traits and characteristics for the dwellers really hurt the game. While the choosing of builders required strategy, it seemed that for the dwellers it didn't matter which one was chosen, so it was just a matter of grabbing the first one you pulled out. |
| Agree          | The interactions with others though trading reef builders                                                                                                                                                                                                                         | The amount if fleshy bacteria added per phase was a bit too much. If possible to reduce from 5 to 2 or 3                                                                                                                                                                                                                                                                                                             |                                                                                                                                                                                                                                                                                                                                                                                                                                                                                                                                                                                       |
| Agree          | I like how it was different from other board games as we had a lot of time between rounds to prepare and strategize.                                                                                                                                                              | Pieces were small and finicky and some rules were confusing for first time players.                                                                                                                                                                                                                                                                                                                                  | Bigger boards would benefit the game greatly.                                                                                                                                                                                                                                                                                                                                                                                                                                                                                                                                         |
| Neutral        | I liked the amount of choice we got with choosing out initial players and reefs and placements.                                                                                                                                                                                   | The rules and instructions are so complicated and there was a lot of algae that had to be added.                                                                                                                                                                                                                                                                                                                     | Make the rules more simplified. Each million years took forever.                                                                                                                                                                                                                                                                                                                                                                                                                                                                                                                      |
| Strongly agree | i enjoyed trying to figure out the best way to set up my reef, and what reef builders would benefit me the most.                                                                                                                                                                  | The rules are very complicated and the scoring is confusing. Maybe less rules and more clarification on the scoring and roles of each organism.                                                                                                                                                                                                                                                                      | way too many mutation pieces.                                                                                                                                                                                                                                                                                                                                                                                                                                                                                                                                                         |

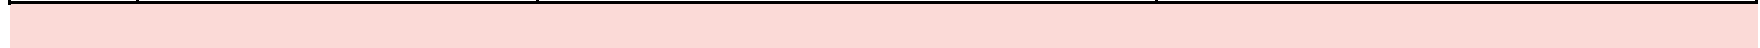

|                |                                                                                                                               |                                                                                                |                                                                                                                                                           |
|----------------|-------------------------------------------------------------------------------------------------------------------------------|------------------------------------------------------------------------------------------------|-----------------------------------------------------------------------------------------------------------------------------------------------------------|
| Strongly agree | The individual game boards- having complete control over you environment                                                      | a lot of the game pieces were similar looking, the rules were also laid out in a confusing way | more simplified rulebook so referencing it isn't as hard- maybe more visual?                                                                              |
| Agree          | I didn't really have something I liked the most                                                                               | The length and complexity                                                                      | Nope                                                                                                                                                      |
| Strongly agree | very unique game, never seen anything like it                                                                                 | the amount of pieces ruined the game for me                                                    | try to create the game into an online version so then there won't be any pieces. Have the game be synced between everyones devices by a code like Kahoot. |
| Neutral        | The strategizing-- trying to figure out what scenarios would be the worst for me, then trying to build my reef to negate them | More opportunities for mutations. There weren't enough for them to do much of anything         |                                                                                                                                                           |
| Neutral        | I liked being able to pick what reef builders I wanted in my reef.                                                            | The instructions were not clear.                                                               |                                                                                                                                                           |
| Neutral        | It was engaging                                                                                                               | The instructions can be improved to start.                                                     | No                                                                                                                                                        |
| Agree          | Diversity                                                                                                                     | Algae                                                                                          | More simple directions                                                                                                                                    |
| Neutral        | It was pretty fun to play and was pretty informative.                                                                         | It was a bit too complicated and the directions seemed to be a little confusing.               |                                                                                                                                                           |
| Neutral        | The uncertainty of the catastrophes                                                                                           | More use from the reef dwellers                                                                |                                                                                                                                                           |

|                   |                                                                                                                                                  |                                                                                                                                                                                                                                                                                                                                 |                                                                                                                                                                                                                     |
|-------------------|--------------------------------------------------------------------------------------------------------------------------------------------------|---------------------------------------------------------------------------------------------------------------------------------------------------------------------------------------------------------------------------------------------------------------------------------------------------------------------------------|---------------------------------------------------------------------------------------------------------------------------------------------------------------------------------------------------------------------|
| Neutral           | I liked that it was indicative of problems in the real world. And that you learn what keeps reefs thriving and what could endanger their health. | There were so many rules that it was sometimes hard to follow.                                                                                                                                                                                                                                                                  |                                                                                                                                                                                                                     |
| Agree             | I enjoyed how strategic the game is while combining it with oceanography and being able to choose different environments to play.                | The amount of game pieces required to play                                                                                                                                                                                                                                                                                      | If there is a way to make game pieces double sided so there is not as many pieces to keep track of. Random Ex. Boulder coral and branching coral on same piece and one flips it to the side they are going to play. |
| Strongly disagree | It was built like a dudgeon dice game                                                                                                            | It was too complex, and the rules were not clear                                                                                                                                                                                                                                                                                | The game should be made digital instead of being table top.                                                                                                                                                         |
| Agree             | The strategy                                                                                                                                     | the counting, the many different cards, and the pre lab questions. this would be way more functional and fun as a computer game!!                                                                                                                                                                                               | no                                                                                                                                                                                                                  |
| Neutral           | i liked that it could be competitive and it used real species.                                                                                   | There were so many variables that it took more time checking the instructions than playing the actual game.                                                                                                                                                                                                                     | I would limit the amount of species that you include and make everything worth one point.                                                                                                                           |
| Agree             | The diversity of reef builders                                                                                                                   | The coral triangle was unnecessary. You could just pull from the bag.                                                                                                                                                                                                                                                           |                                                                                                                                                                                                                     |
| Agree             | the disasters                                                                                                                                    | there is a lot of counting which was the only downfall                                                                                                                                                                                                                                                                          | the handbook has good info but I feel like it needs to be a little more simplified for people outside of stem to read or like a little more direct and simplified.                                                  |
| Strongly agree    | It allowed me to customize my own reef                                                                                                           | Too many pieces to have on one board                                                                                                                                                                                                                                                                                            | Na                                                                                                                                                                                                                  |
| Neutral           | The reading feature to make the game more cooperative                                                                                            | Counting diversity since it was hard to distinguish species.                                                                                                                                                                                                                                                                    | Add whether or not a builder is also a recruiter directly on the tokens.                                                                                                                                            |
| Strongly agree    | The disaster made the game chaotic which was fun                                                                                                 | Counting diversity was a little difficult but definitely took longer                                                                                                                                                                                                                                                            |                                                                                                                                                                                                                     |
| Neutral           | I liked how much strategy it took, and how each of the different boards and organisms had different benefits and detriments.                     | I think counting diversity points was very difficult, the coral triangle zone really didn't have a purpose, and it was hard to tell what organisms already had what benefits or if they were recruiters because there was no notation or symbol on the tokens themselves.                                                       | I think adding small symbols to the tokens to notate what qualities they have would be helpful.                                                                                                                     |
| Strongly agree    | I love how in depth it went, all the detail in the game pieces and the different environments we could use                                       | There needs to be more clear instructions in certain sections and some of the instructions were too long. Another thing is having a legend for all the symbols in one place instead of scattered throughout the sections and clarification that the white part on the depth range means those aren't depths the coral can be on | It's really fun! However, it can be hard/take a while to get the game started if you don't have a decent biology background and it can make enjoying the game hard                                                  |



|                   |                                                                                                                                                            |                                                                                                                                                                                                                                                                                                                |                                                                                                                                                                                                                                                                                                                           |
|-------------------|------------------------------------------------------------------------------------------------------------------------------------------------------------|----------------------------------------------------------------------------------------------------------------------------------------------------------------------------------------------------------------------------------------------------------------------------------------------------------------|---------------------------------------------------------------------------------------------------------------------------------------------------------------------------------------------------------------------------------------------------------------------------------------------------------------------------|
| Disagree          | I liked being able to compete with my friends and I like how there was a cheat sheet for everything because there was a lot to remember                    | Very science heavy and the pre-lab questions felt like doing HW which made it less fun                                                                                                                                                                                                                         |                                                                                                                                                                                                                                                                                                                           |
| Strongly agree    | it was fun and educating.                                                                                                                                  | simpler instructions                                                                                                                                                                                                                                                                                           | no                                                                                                                                                                                                                                                                                                                        |
| Agree             | I liked being able to strategize which reef builders I wanted in my reef based on their advantages.                                                        | I think it was a lot of fun and it had a good amount of educational material without taking away from the game-play.                                                                                                                                                                                           | Not at this time.                                                                                                                                                                                                                                                                                                         |
| Agree             | It was dynamic.                                                                                                                                            | Could have less beneficial mutations/more harmful mutations comparatively.                                                                                                                                                                                                                                     | Player choice stopped it from feeling random. Maybe if there was a way to randomly put the mutations or algae on different organisms?                                                                                                                                                                                     |
| Strongly agree    | I liked the added mutations and how we could trade our juvenile to migrate to grow our population as well as diversify it.                                 | Too much fleshy algae                                                                                                                                                                                                                                                                                          | No                                                                                                                                                                                                                                                                                                                        |
| Agree             |                                                                                                                                                            |                                                                                                                                                                                                                                                                                                                |                                                                                                                                                                                                                                                                                                                           |
| Strongly disagree | We were competing and we each had different reef environments. It was interesting to see how different catastrophes effected each environment differently. | At first, the instructions were confusing. And the questions in the post lab seemed redundant.                                                                                                                                                                                                                 |                                                                                                                                                                                                                                                                                                                           |
| Agree             | I really liked the visual interpretation of a reef community, and how mutations and environmental events effect their growth through time.                 | I disliked the complexity of some of the rules and the organization of the pieces during gameplay. There were a few instances of confusion that slowed the gameplay way down. I wish there was a tray of some kind to keep the organism pieces together while still being easier to access than multiple bags. | I would love to see the number of mutations for the organisms be randomized a bit instead of only two per round. For example, there could be 1 to 4 mutations based on what number you role. 1 for die numbers 1-3, 2 for 4-6, 3 for 7-9, and 4 for 10-12.                                                                |
| Neutral           | The concept was easy to get ahold of                                                                                                                       | It would be helpful if the reef builder tiles had the names of the species on them, at least on one side. That was the main reason I feel like I didn't learn much, because I just kept calling them "the round one" or the "pink one". Everything just blended together on my game board.                     |                                                                                                                                                                                                                                                                                                                           |
| Agree             | killing everything                                                                                                                                         | need more simple instructions                                                                                                                                                                                                                                                                                  | no                                                                                                                                                                                                                                                                                                                        |
| Disagree          | The disasters                                                                                                                                              | I felt like it took to long to set up as well as remembering every step while playing. We ended up forgetting about the triangle all together.                                                                                                                                                                 | I know it's a lot but I feel like a digital version you could play on your phone or a companion app to help reduce the about of pieces and act as a real- time guide would make the game way more fun and less confusing. You could focus more on learning and less on the "what's next?" and "Am I reading this right?". |
| Agree             | I like how competitive to was.                                                                                                                             | I felt like the directions were hard to figure out at the beginning and the game went really slow but once we figured it went good.                                                                                                                                                                            | My group got confused with the directions when it came to the "phases" and "rounds", maybe specify that a little more. .                                                                                                                                                                                                  |

|                |                                                                                                                                                                                                                           |                                                                                                                                                                                                                                   |                                                                                                                                                                                                                                                                                                                                                                                                                                                                                                         |
|----------------|---------------------------------------------------------------------------------------------------------------------------------------------------------------------------------------------------------------------------|-----------------------------------------------------------------------------------------------------------------------------------------------------------------------------------------------------------------------------------|---------------------------------------------------------------------------------------------------------------------------------------------------------------------------------------------------------------------------------------------------------------------------------------------------------------------------------------------------------------------------------------------------------------------------------------------------------------------------------------------------------|
| Agree          | Mix of strategy and luck with a good refresher over types of corals                                                                                                                                                       | The game mat/board could be bigger to accommodate the chips and mutations                                                                                                                                                         | When we played (geology students), we were all familiar with reef systems and this was a good refresher                                                                                                                                                                                                                                                                                                                                                                                                 |
| Agree          |                                                                                                                                                                                                                           | The only issue I had was the duplication of every reef builder. Sometimes that meant tracking down more than twenty pieces from different baggies. However, some sort of bowl or tray would have made this much easier.           | Maybe some sort of organization tray would be helpful?                                                                                                                                                                                                                                                                                                                                                                                                                                                  |
| Strongly agree | Although someone may be in last, they can easily get to first if they play their board right.                                                                                                                             | The set up process was a little lengthy.                                                                                                                                                                                          | Swapping out some reef builders with preferred offspring when your board is full.                                                                                                                                                                                                                                                                                                                                                                                                                       |
| Neutral        | Educational                                                                                                                                                                                                               | Too many pieces, rules were confusing                                                                                                                                                                                             | Way to complicated in set up, too many little pieces, hard to calculate winner or remember all the rules. Educational but not really fun, needs to be simplified. The art is beautiful though and it is very educational                                                                                                                                                                                                                                                                                |
| Strongly agree | the variety of organisms                                                                                                                                                                                                  | i wish the boards had more squares                                                                                                                                                                                                | maybe use easier to distinguish builder pieces                                                                                                                                                                                                                                                                                                                                                                                                                                                          |
| Agree          | I enjoyed learning about the different traits the different reef builders had and using those traits to strategize my game play. I also enjoyed the mutation ideas and rolling the die to see which random one was given. | I did not enjoy how much prep went into the game to be able to understand what I was doing, but I do understand the prep is needed in order to gain knowledge about the evolution of ecosystems and strategize the game play.     | I believe this game is a great tool for educating reef evolution, and I did enjoy playing it with my classmates. While the instructions and prep were a bit long to get through, I believe they were necessary in order to understand, enjoy, and gain knowledge through the game. As for me, I believe I would have understood the instructions and rules a little better if there was a video of an example play through that I could watch and listen to while going through the instructions/rules. |
| Strongly agree | Honestly, it was so much fun playing with my classmates. It's a great way to bring engagement into a classroom.                                                                                                           | Nothing is really coming to mind. It was a really well done game except how dusty the pieces of the game were but I figured that cannot be helped.                                                                                | I cannot really think of anything big, but one thing came to mind. Pre-lab questions, learning the rules, and set up all together took much longer than we thought it would. It might be nice to let people know how long it might take. The game itself went by at a good pace once my classmates and I got the hang of it.                                                                                                                                                                            |
| Agree          | The visual aspect was fun to look at                                                                                                                                                                                      | Rules are not the easiest until you start actually playing.                                                                                                                                                                       | Needs a large warning about the amount of soot that that will be all over everything.                                                                                                                                                                                                                                                                                                                                                                                                                   |
| Agree          | I liked the different board layouts and the trading aspect.                                                                                                                                                               | The pre-lab was a little lengthy. I feel like we were worn out by the time we got to play after completing the pre-lab and setting up the game. Also, there was a LOT of soot. I understand why there was soot, but it was a lot. | I think some type of divided box in which you could put all the pieces in would be nice. It was difficult to keep track of all the bags and tiles.                                                                                                                                                                                                                                                                                                                                                      |
| Agree          | It is a fun game getting, to a point where you can start trading corals was really fun.                                                                                                                                   | The game play takes a bit of understanding - once you understand it is easy to play but initially - the instructions could be a bit clearer.                                                                                      | If the long term disasters and short term disaster card could be a bit more distinctive                                                                                                                                                                                                                                                                                                                                                                                                                 |
| Strongly Agree | I enjoyed the opportunity for competitiveness while also being able to learn                                                                                                                                              | The rules were a little complex, but that's expected of a game with as much learning as this one                                                                                                                                  | no additional feedback                                                                                                                                                                                                                                                                                                                                                                                                                                                                                  |
| No Response    | No Response                                                                                                                                                                                                               | No Response                                                                                                                                                                                                                       | No Response                                                                                                                                                                                                                                                                                                                                                                                                                                                                                             |

|                |                                                                                                                                                                                                                                                                                                    |                                                                                                                                                                                                               |                                                                                                                                                                                   |
|----------------|----------------------------------------------------------------------------------------------------------------------------------------------------------------------------------------------------------------------------------------------------------------------------------------------------|---------------------------------------------------------------------------------------------------------------------------------------------------------------------------------------------------------------|-----------------------------------------------------------------------------------------------------------------------------------------------------------------------------------|
| No Response    | No Response                                                                                                                                                                                                                                                                                        | No Response                                                                                                                                                                                                   | No Response                                                                                                                                                                       |
| Agree          | It was complex in a good way and it was fun to build and design our own reefs.                                                                                                                                                                                                                     | It took forever to copy and paste all the organisms when they reproduced, but I think it would be much easier in person.                                                                                      | This game is genius & very creative, I thoroughly enjoyed it!                                                                                                                     |
| Disagree       | My favorite part of this game was when we could trade organisms to simulate migration.                                                                                                                                                                                                             | At times it felt like there was too much going on- mutations, reproduction, deletion of algae, having to take screenshots of the board- but this is most likely due to the limited amount of time during lab. | This game was a lot more fun than the taphonomy game. It was much easier to understand and thus more enjoyable.                                                                   |
| Strongly Agree | I liked that this game had no attacks on other players, every player did their own thing. I thrive without conflict in gaming, so I like this game.                                                                                                                                                | I did not like playing on jamboard. I think this makes the game more confusing having to flip back and forth between slides.                                                                                  | Nope, but I like the graphics and gameplay of this game significantly more than the taphonomy one. This is also because this game lacks the mechanism of attacking other players. |
| No Response    | No Response                                                                                                                                                                                                                                                                                        | No Response                                                                                                                                                                                                   | No Response                                                                                                                                                                       |
| No Response    | No Response                                                                                                                                                                                                                                                                                        | No Response                                                                                                                                                                                                   | No Response                                                                                                                                                                       |
| Neutral        | I liked being paired into teams and forced to collaborate and share the strategies we developed in our pre-lab.                                                                                                                                                                                    | The only way this could have possibly have been better was if we had been able to play in person. I was pleasantly surprised by how much I enjoyed this one. I usually hate board games, in honesty.          | The nurse past of the game is pretty confusing, and hard to line up over a zoom call on jamboard. Maybe that could be made simpler?                                               |
| Disagree       | I liked working with a partner as they helped me understand the game better.                                                                                                                                                                                                                       | Playing this game online made it difficult to keep track of the game.                                                                                                                                         | The instructions are a bit difficult to understand. I had to go over them several times before and during the game.                                                               |
| Agree          | The evolutions and mutations were fun to get, seeing your luck either do you well or terribly was a bit exciting.                                                                                                                                                                                  | I was very confused as to what was happening in the game. I felt like a bit of an idiot remembering all the rules to be frank, I had difficulty remembering.                                                  | n/a                                                                                                                                                                               |
| Neutral        | I liked how it was interactive, and seemed easier to understand than the game from last week's lab.                                                                                                                                                                                                | Moving each individual piece on the board was difficult and tedious at times.                                                                                                                                 | No Response                                                                                                                                                                       |
| No Response    | No Response                                                                                                                                                                                                                                                                                        | No Response                                                                                                                                                                                                   | No Response                                                                                                                                                                       |
| Agree          | I liked all the different factors you had to consider to increase your reef's chances for survival; placement, mutations, trading species, starting board, starting organisms, reef dweller selection, etc. all had to be considered based on knowledge of reef organism strengths and weaknesses. | The board did get a little messy and harder to follow as more pieces were added throughout the game, but this may also be because of the limitations of playing the game virtually.                           | No Response                                                                                                                                                                       |
| Neutral        | I liked being able to choose between different environments.                                                                                                                                                                                                                                       | The disasters were pretty devastating, it became impossible to keep spaces clear of algae.                                                                                                                    | Not at this time.                                                                                                                                                                 |

|                   |                                                                                                                                                                                                                                                                                                                                                                                                                                                                                                               |                                                                                                                                                                                                                                                                                                                                                                                                                                                                                                                                                                                                                                                                                          |                                                                                                                                                                                                                                                                                                                                           |
|-------------------|---------------------------------------------------------------------------------------------------------------------------------------------------------------------------------------------------------------------------------------------------------------------------------------------------------------------------------------------------------------------------------------------------------------------------------------------------------------------------------------------------------------|------------------------------------------------------------------------------------------------------------------------------------------------------------------------------------------------------------------------------------------------------------------------------------------------------------------------------------------------------------------------------------------------------------------------------------------------------------------------------------------------------------------------------------------------------------------------------------------------------------------------------------------------------------------------------------------|-------------------------------------------------------------------------------------------------------------------------------------------------------------------------------------------------------------------------------------------------------------------------------------------------------------------------------------------|
| Strongly Disagree | I enjoyed creating a strategy. The handbook explains the science behind the game very well, and I felt like I learned something.                                                                                                                                                                                                                                                                                                                                                                              | I think the game is fine, but the jamboard mechanics continue to interrupt the flow of gameplay, leading to lots of frustration and wasted time.                                                                                                                                                                                                                                                                                                                                                                                                                                                                                                                                         | While the handbook is quite detailed, I think the benefits of using this game as a learning exercise could be maximized if there was an introduction lecture to go over the systems and the organisms.                                                                                                                                    |
| Agree             | The game was enjoyable by playing with our own selection of not only our own organisms but also our own choice of board (our reef). This meant that everyone could choose their own format and come to different results based not only on what happened to our community but also by the early choice we made.                                                                                                                                                                                               | What I liked least about the game was the fact that it took way too long to play, even with entire rounds taken out of the game. My group was only able to get through two disasters and were not able to get to full experience.                                                                                                                                                                                                                                                                                                                                                                                                                                                        | The instructions for the game were rather long as well as the game itself, and could possibly be condensed slightly. Otherwise, the game was rather enjoyable.<br><br>None that I can think of                                                                                                                                            |
| Disagree          | It was a nice break from normal labs                                                                                                                                                                                                                                                                                                                                                                                                                                                                          | It was hard to play online                                                                                                                                                                                                                                                                                                                                                                                                                                                                                                                                                                                                                                                               |                                                                                                                                                                                                                                                                                                                                           |
| Agree             | The strategizing.                                                                                                                                                                                                                                                                                                                                                                                                                                                                                             | The inability to diversify if other players did not want to aid you.                                                                                                                                                                                                                                                                                                                                                                                                                                                                                                                                                                                                                     | Not that I can think of at the moment.                                                                                                                                                                                                                                                                                                    |
| No Response       | No Response                                                                                                                                                                                                                                                                                                                                                                                                                                                                                                   | No Response                                                                                                                                                                                                                                                                                                                                                                                                                                                                                                                                                                                                                                                                              | No Response                                                                                                                                                                                                                                                                                                                               |
| Neutral           | I liked that it was collaborative and that I had team mates to discuss my strategy with and ask questions too.                                                                                                                                                                                                                                                                                                                                                                                                | Our lab period was a bit disorganized because our table was a bit confused about the rules over Zoom/Jamboard. There was just a lot of rules and instruction, and it took some time to decipher.                                                                                                                                                                                                                                                                                                                                                                                                                                                                                         | I don't know how you would cut down on the rules of the game without taking away from the learning that is in each phase. I think it was just more confusing online than it would have been in person, where we can actually physically collaborate more, and we aren't having to minimize and maximize our boards to see or copy tokens. |
| Disagree          | I liked the different environmental events and how they impacted different organisms.                                                                                                                                                                                                                                                                                                                                                                                                                         | Too long and a bit confusing, could be pared down a bit, there were quite a few elements at play.                                                                                                                                                                                                                                                                                                                                                                                                                                                                                                                                                                                        | I really like this game and way of learning material but I wish it was a bit shorter and less complex given the time we have to play.                                                                                                                                                                                                     |
| Neutral           | I like being able to form my own reef and making decisions that would help my reef.                                                                                                                                                                                                                                                                                                                                                                                                                           | Sometimes I would forget about what depth a specific coral could be, but it was well adapted to jamboard.                                                                                                                                                                                                                                                                                                                                                                                                                                                                                                                                                                                | Not really, I enjoyed the game!                                                                                                                                                                                                                                                                                                           |
| Strongly Disagree | N/A                                                                                                                                                                                                                                                                                                                                                                                                                                                                                                           | N/A                                                                                                                                                                                                                                                                                                                                                                                                                                                                                                                                                                                                                                                                                      | No Response                                                                                                                                                                                                                                                                                                                               |
| Strongly Agree    | The trading aspect really added to the quality of the game. It added a competitive edge that forces the player to consider the benefits and drawbacks to each trade and that in itself is the process through which they further their understanding of the material. Felt like playing Catan. I had to actually know the rules of the game (aka the material) to catch when my group didn't realize that they couldn't support 12 reef dwellers with only 8 reef builders who can accept dwellers and so on. | I didn't recognize the different reef builders by sight so I had to keep referring back to the handout the entire game which is a bit inconvenient online. Possibly adding the name to the pictures as a banner on the bottom would help.<br><br>I think here I would want to mention the number of catastrophe happening was pretty low: compared to "Dead and Fossilized", the number of dangers the reefs could face was small. In "Dead and Fossilized", the fossils were constantly threatened by other teams and additionally by disastrous events, and here it was not hard to obtain a large amount of reefs (especially considering the number of reefs picked up every round). | To my knowledge the only purpose of the reef dwellers was to eat reef coverers. I didn't really understand the explanation on how they move and stuff because, from how we played, we just left them off to the side of the gameboard and just made sure to have them eat and also verify our ability to maintain them.                   |
| Agree             | I think the best part of the game was that there actually were different strategies and ways to predict the catastrophe (or more like become prepared for it) once you understand all the rules of the game.                                                                                                                                                                                                                                                                                                  |                                                                                                                                                                                                                                                                                                                                                                                                                                                                                                                                                                                                                                                                                          | I would just add a possibility of hurting other players' collection, just like in "Dead and Fossilized"                                                                                                                                                                                                                                   |

|                   |                                                                                                                                                                               |                                                                                                                                                                                                                                                                                       |                                                                                                                                                                                                                                                                                             |
|-------------------|-------------------------------------------------------------------------------------------------------------------------------------------------------------------------------|---------------------------------------------------------------------------------------------------------------------------------------------------------------------------------------------------------------------------------------------------------------------------------------|---------------------------------------------------------------------------------------------------------------------------------------------------------------------------------------------------------------------------------------------------------------------------------------------|
| Neutral           |                                                                                                                                                                               |                                                                                                                                                                                                                                                                                       |                                                                                                                                                                                                                                                                                             |
|                   | I deeply enjoyed the concept of this board game. I am a huge fan of board games and I thought this one was really good. I only wish that we had more time to finish the game. | Just that it was played on google jamboard. I would really have liked to play this in person. Also maybe even more mutations would make it fun.                                                                                                                                       | Make more games. I am a huge fan and I love the sciency games.                                                                                                                                                                                                                              |
| No Response       | No Response                                                                                                                                                                   | No Response                                                                                                                                                                                                                                                                           | No Response                                                                                                                                                                                                                                                                                 |
| No Response       | No Response                                                                                                                                                                   | No Response                                                                                                                                                                                                                                                                           | No Response                                                                                                                                                                                                                                                                                 |
| Strongly Agree    |                                                                                                                                                                               |                                                                                                                                                                                                                                                                                       |                                                                                                                                                                                                                                                                                             |
|                   | I like collaborating with my partner on how to build our reef, that was definitely how we experienced learning about how reefs work and how stresses affect them.             | I think that the management of all the pieces was slightly overwhelming but after getting the hang of it, the game was really fun.                                                                                                                                                    | The fact you even considered trying this approach to learning I find marvelous, thank you Dr. Martindale. I have no relevant feedback to offer.                                                                                                                                             |
| No Response       | No Response                                                                                                                                                                   | No Response                                                                                                                                                                                                                                                                           | No Response                                                                                                                                                                                                                                                                                 |
| No Response       | No Response                                                                                                                                                                   | No Response                                                                                                                                                                                                                                                                           | No Response                                                                                                                                                                                                                                                                                 |
| Strongly Agree    |                                                                                                                                                                               |                                                                                                                                                                                                                                                                                       |                                                                                                                                                                                                                                                                                             |
|                   | I liked that the game had very clear rounds that repeated so that it was simple and fun to try and strategize for the next round. I also liked the trading aspect.            | This is probably an online issue, but it was clunky to try and move the pieces around and to add new pieces to your board (this is probably due to the copy and paste tool and having to use it several times on small game pieces).                                                  | I think in the future it would be nice to have a website to play this on rather than jamboard if the game HAD to be played in a virtual setting (I know this requires a lot of time and coding and the jamboard worked fine, but online works the easiest with automated computer commands) |
| Neutral           | I liked that we got to collaborate in small groups to plan out a reef.                                                                                                        | N/A                                                                                                                                                                                                                                                                                   | N/A                                                                                                                                                                                                                                                                                         |
| Agree             | You have to plan ahead of time or it becomes harder as time progresses.                                                                                                       | Not sure how to recommend since it might make the game less scientific but everyone on my board chose the Atoll since it didn't have land and was a good balance. Maybe some more incentive to choose the other boards? Or maybe I do not know the value of the other ones.           | Very interesting concept and gameplay!                                                                                                                                                                                                                                                      |
| Strongly Disagree | The ability to not only choose the organisms you started with but the environment as well.                                                                                    | Possibly some way to place the game faster (cutting to two rounds or playing the game faster). In my room, no one wanted to talk so it took very long just to get through one round. I think it would move a lot faster if each team was called upon to see what their move would be. | I think I stated all I had on my mind above, thank you!                                                                                                                                                                                                                                     |
| Disagree          | I thought the game was well put together.                                                                                                                                     | I'm not sure.                                                                                                                                                                                                                                                                         | Not really.                                                                                                                                                                                                                                                                                 |
| Agree             | I liked how there were so many different pathways one could take to result in different outcomes; it really made sure to keep the game interesting and players on our feet!   | I think that there could have been less options for the reef builders; I found it difficult to remember everything that applied to all of them specifically.                                                                                                                          | I don't think so it was fun!                                                                                                                                                                                                                                                                |

|                   |                                                                                                                                                            |                                                                                                                                                                                                                                                                                                                                              |                                                                                                                                                                                                                                                                                                                                        |
|-------------------|------------------------------------------------------------------------------------------------------------------------------------------------------------|----------------------------------------------------------------------------------------------------------------------------------------------------------------------------------------------------------------------------------------------------------------------------------------------------------------------------------------------|----------------------------------------------------------------------------------------------------------------------------------------------------------------------------------------------------------------------------------------------------------------------------------------------------------------------------------------|
| Disagree          | The game was pretty and well set up. It was organized.                                                                                                     | There were a lot of things to keep track of. There were a lot of moving parts that made it confusing.<br><br>I didn't like how in the pre-lab we planned for our own game board and then when we got to lab suddenly we had to work with a partner. I wish we at least prepared for a partner.                                               | Maybe add the organisms' names under their picture so the players don't have to match the picture with title all the time. I am not good at memorizing names.                                                                                                                                                                          |
| Agree             | Actually going through the motions of the game really helps me understand reef processes.                                                                  | We only had time to do 2 rounds and already the stacking in our reef so was confusing and hard to navigate (this is partially jam board- I'm sure playing this in person is easier)                                                                                                                                                          | I like the games in lab, they are very helpful! The reef game has a lot of "moving parts" and the stacking of the builders, mutations, algae, and dwellers get a bit confusing on a small board.                                                                                                                                       |
| Disagree          | Working in groups and it's a fun way to learn about natural selection and evolution                                                                        | It takes really long learn how to play, I could not understand how to play until after the lab was over. I also think that there are too many mutations and traits to keep track of.                                                                                                                                                         | Nothing more                                                                                                                                                                                                                                                                                                                           |
| Strongly Agree    | I liked how we can build our own reef however we want.                                                                                                     | It was very confusing and it took a long time but that may have been because it was an online version.                                                                                                                                                                                                                                       | Maybe make the game a little simpler for the online version to make it go faster.                                                                                                                                                                                                                                                      |
| Agree             | I especially liked the stackable ability in this game, I believe that made it much more variable and open ended, allowing us to invest more into the game. | I didn't like how long rounds lasted, they dragged on after a while. Perhaps making certain stages shorter and some longer would help game progression.                                                                                                                                                                                      | I think this game was very well thought out and has a good baseline in terms of goals and setup it also has a very clear ending which is crucial. However, in between is a little more complicated which in itself isn't bad, but coupled with the long runtime, can be tedious.                                                       |
| Agree             | I liked how it felt like I was building my own unique reef.                                                                                                | There was nothing really. I didn't know the game would take that long though. The only reason it took long was of having to minimize the icons and drag and dropping.                                                                                                                                                                        | Nope! Question 15 was my only concerns!                                                                                                                                                                                                                                                                                                |
| No Response       | No Response                                                                                                                                                | No Response                                                                                                                                                                                                                                                                                                                                  | No Response                                                                                                                                                                                                                                                                                                                            |
| Strongly Disagree | I liked the freedom you had in choosing your board and the locations of the corals.                                                                        | I didn't like how long it took to copy all the corals and mutations on jam board every turn.                                                                                                                                                                                                                                                 | I personally think the rules were a bit long. (The gamebook is 25 pages) My least favorite part is that it takes a lot of time to learn the rules and I feel like that can be simplified. We had to watch 23 minutes of prep videos for this lab and I honestly think the content of those videos could have been in a 5 minute video. |
| Disagree          | I liked that the game went through a variety of fossilization processes.                                                                                   | I didn't like that the game was single-player compared to the other that was played in groups, only because the game wasn't easy to pick up and learn right away so it was difficult to interpret on your own.                                                                                                                               | I have no other feedback.                                                                                                                                                                                                                                                                                                              |
| Neutral           | I enjoyed working in pairs and collaborating.                                                                                                              | Maybe label the organisms? It took me a second to be able to recognize them fluently.                                                                                                                                                                                                                                                        | Other than labels, I'm not sure                                                                                                                                                                                                                                                                                                        |
| No Response       | No Response                                                                                                                                                | No Response                                                                                                                                                                                                                                                                                                                                  | No Response                                                                                                                                                                                                                                                                                                                            |
| Strongly Disagree | I liked the design and the concepts.                                                                                                                       | I felt like the rules of the game were more confusing to me than the science it was supposed to be teaching us. I think it would have been better if we were in person, but playing a board game on jam board is tedious and difficult. We spent more time moving and deleting game pieces than actually playing or discussing any material. | This game was well thought out, I just think playing it online was very difficult.                                                                                                                                                                                                                                                     |

|                |                                                                                                                                                                                                      |                                                                                                                                                                                                                                                                                                                                                                     |                                                                                                                                                                                                                                                                                                                                                                                                                                                                                |
|----------------|------------------------------------------------------------------------------------------------------------------------------------------------------------------------------------------------------|---------------------------------------------------------------------------------------------------------------------------------------------------------------------------------------------------------------------------------------------------------------------------------------------------------------------------------------------------------------------|--------------------------------------------------------------------------------------------------------------------------------------------------------------------------------------------------------------------------------------------------------------------------------------------------------------------------------------------------------------------------------------------------------------------------------------------------------------------------------|
| Neutral        | I thought the game was fun and enjoyed the different environments we could choose.                                                                                                                   | The way the game is played, and the possible mutations and organism types one can get, one can easily take advantage and quickly get a massive population of one type of organism in just 2 turns. Furthermore, if the right organism is chosen to do this with, there's really only 1 disaster that could negatively affect the reef. This is too easy to exploit. | Fix the exploit of choosing all starting organisms as a single type of strong organism that allows players to rapidly accumulate a large colony of a single type of resilient, and hard to falter organism. This can be done by limiting how many of each type of starting organism a team/person may choose.                                                                                                                                                                  |
| Agree          | I like that I can play and learn at the same time.                                                                                                                                                   | I think that playing in a group would be better                                                                                                                                                                                                                                                                                                                     | I would prefer playing the game in a team rather than solo                                                                                                                                                                                                                                                                                                                                                                                                                     |
| Agree          | I liked seeing how much my reef grew and what I could do with the mutations.                                                                                                                         | The instructions were a bit difficult to understand and the flow of the game was a bit off.                                                                                                                                                                                                                                                                         | Fun game, but it's a bit hard to follow. Maybe have a more straightforward and general instructions of the game.                                                                                                                                                                                                                                                                                                                                                               |
| Strongly Agree | I liked the competitive atmosphere and team aspect of it. The shorter time length was also nice.                                                                                                     | There wasn't anything too bad about the game, I just never noticed that certain animals couldn't make reef dwellers which caused a lot of issues for me haha.                                                                                                                                                                                                       | No feedback needed the game went smoothly.                                                                                                                                                                                                                                                                                                                                                                                                                                     |
| Disagree       | I liked that we could pick our own environment and strategize off of that.                                                                                                                           | Some of the rules were a little confusing.                                                                                                                                                                                                                                                                                                                          | We were unable to finish the game during our lab so I would suggest shortening it.                                                                                                                                                                                                                                                                                                                                                                                             |
| Agree          | What I liked most about this game was being able to work with someone else as it helped me clear up misconceptions and realize that I had huge deficiencies in my strategy before starting the game. | I think what I liked least about the game were the instructions as they were a bit more confusing this time around than with the last game.                                                                                                                                                                                                                         | Other than what I just mentioned, I think this game was pretty good and enjoyable, even in its current jamboard form.                                                                                                                                                                                                                                                                                                                                                          |
| Disagree       | It was an interesting concept.                                                                                                                                                                       | It made me sad seeing how reefs can easily be destroyed. Alas, that is how it is in real life, too.                                                                                                                                                                                                                                                                 | N/A                                                                                                                                                                                                                                                                                                                                                                                                                                                                            |
| Agree          | The ability to strategize based on location of placement                                                                                                                                             | The lack of sabotage                                                                                                                                                                                                                                                                                                                                                | Sometimes the instructions felt inaccessible in the way that they were worded--particularly in the instructional video--as in they used what felt like academic phrasing which kind of shut off my brain as I was trying to learn a game. Especially in a high school setting, I could see myself being disinterested in trying to learn the game mechanics because of this. But the concept of the game was really enjoyable and as I was playing I enjoyed it more and more. |

|                |                                                                                                                                  |                                                                                                                                             |             |
|----------------|----------------------------------------------------------------------------------------------------------------------------------|---------------------------------------------------------------------------------------------------------------------------------------------|-------------|
| Agree          | The team aspect                                                                                                                  | The algae takes over super fast                                                                                                             | N/A         |
| Disagree       | The educational factor.                                                                                                          | The rules were a little unclear, perhaps so a practice round on the video of how to play.                                                   | n/a         |
| No Response    | No Response                                                                                                                      | No Response                                                                                                                                 | No Response |
| Strongly Agree | I really liked the idea of managing the coral and having choices at different stages and easily being able to adjust strategies. | It felt like there were only so many opportunities to really get back into the game. I guess this makes sense given the topic but less fun. | N/A         |
| No Response    | No Response                                                                                                                      | No Response                                                                                                                                 | No Response |
| No Response    | No Response                                                                                                                      | No Response                                                                                                                                 | No Response |
| No Response    | No Response                                                                                                                      | No Response                                                                                                                                 | No Response |
| No Response    | No Response                                                                                                                      | No Response                                                                                                                                 | No Response |
| No Response    | No Response                                                                                                                      | No Response                                                                                                                                 | No Response |
| Strongly Agree | learning about the reef environments                                                                                             | nothing                                                                                                                                     | N/A         |
| No Response    | No Response                                                                                                                      | No Response                                                                                                                                 | No Response |
| Strongly Agree | No Response                                                                                                                      | No Response                                                                                                                                 | No Response |
| No Response    | No Response                                                                                                                      | No Response                                                                                                                                 | No Response |
| Agree          | Made you strategize and think                                                                                                    | N/A                                                                                                                                         | N/A         |
| No Response    | No Response                                                                                                                      | No Response                                                                                                                                 | No Response |



|                |                                          |                                                             |             |
|----------------|------------------------------------------|-------------------------------------------------------------|-------------|
| No Response    | No Response                              | No Response                                                 | No Response |
| Strongly Agree | Collaborating with my team was fun       | N/A                                                         | N/A         |
| No Response    | No Response                              | No Response                                                 | No Response |
| No Response    | No Response                              | No Response                                                 | No Response |
| Agree          | Very competitive but still learned a lot | Rules are complicated                                       | No Response |
| No Response    | No Response                              | No Response                                                 | No Response |
| Agree          | No Response                              | I enjoyed the collaboration aspect of last week's game more | No Response |
| Neutral        | No Response                              | No Response                                                 | No Response |
| Agree          | Strategies and the layout                | Nothing                                                     | No          |
| No Response    | No Response                              | No Response                                                 | No Response |
| No Response    | No Response                              | No Response                                                 | No Response |

|         |                                                                                                                                                                |                                                                                                                                           |                                                                                                                                                                                                   |
|---------|----------------------------------------------------------------------------------------------------------------------------------------------------------------|-------------------------------------------------------------------------------------------------------------------------------------------|---------------------------------------------------------------------------------------------------------------------------------------------------------------------------------------------------|
| Neutral | I liked being able to pick my own coral, instead of being assigned them. I also liked that we could trade coral with each other to make our reef more diverse. | I disliked that some of the rules were vague and that we had to put 5 algae on the board each round. My reef was infested with algae.     | I think having more of each reef board would be nice. Like 4 each board, instead of 2 each board. This way every player has a choice to get the one they want, instead of first come first serve. |
| Agree   | I enjoyed the harshness of each disaster and the strategizing that must incorporate these dramatic changes.                                                    | A more well-distributed balance of devastating and inconvenient disasters. Losing a major portion of the coral every time isn't very fun. | No Response                                                                                                                                                                                       |
| Agree   | I liked trading with the other groups, you really had to bring out your inner bargainer                                                                        | The steps and instructions were a bit confusing at times for me personally                                                                | N/A                                                                                                                                                                                               |

|                |                                                                                                                                                                                                                                                                                                    |                                                                                                                                                                                                                                                  |                                                                                                                                                                                                                                                                                          |
|----------------|----------------------------------------------------------------------------------------------------------------------------------------------------------------------------------------------------------------------------------------------------------------------------------------------------|--------------------------------------------------------------------------------------------------------------------------------------------------------------------------------------------------------------------------------------------------|------------------------------------------------------------------------------------------------------------------------------------------------------------------------------------------------------------------------------------------------------------------------------------------|
|                |                                                                                                                                                                                                                                                                                                    |                                                                                                                                                                                                                                                  |                                                                                                                                                                                                                                                                                          |
| Neutral        | I liked the duality of the evolution dice rolls. On one hand, you can get an evolution that can extremely benefit your organism but on the other hand, it can also kill all of that organism's population depending on the events.                                                                 | I wish I could play more actively instead of waiting for my next move.                                                                                                                                                                           | I guess that many high school to college-aged students are impatient, so making the game a little faster might increase concentration.                                                                                                                                                   |
| Agree          | Instructions were fairly easy to understand, especially in comparison to the last game.                                                                                                                                                                                                            | It was very repetitive.                                                                                                                                                                                                                          | Maybe create a round that differs from the others so it isn't so repetitive?                                                                                                                                                                                                             |
| Agree          | The mutations in the game are an interesting facet.                                                                                                                                                                                                                                                | Starting off, it was a bit hard to comprehend the rules.                                                                                                                                                                                         | n/a                                                                                                                                                                                                                                                                                      |
| Strongly Agree | I was very interested and there were a lot of different paths to take to success.                                                                                                                                                                                                                  | The rules were very long and quite convoluted                                                                                                                                                                                                    | I would suggest making the rules more streamlined, there were just too many things happening and too many things that affected other things to consider.                                                                                                                                 |
| Strongly Agree | I loved that you weren't explicitly against other people (in terms of like- the taphonomy game, where there were ways to attack or sabotage the other teams), and how it was a chill game where you could focus on yourself and still have friendly contact with other reefs (the trading aspect). | It's not a complaint, but it would be cool if for some of the short-term disasters or maybe even a long-term one, there was a die roll to see how much it would impact your reef (potentially lessening or worsening the effects of a disaster). | Nothing, just let me know when I can buy it!! :)                                                                                                                                                                                                                                         |
| Agree          | I enjoyed the diversity of organisms involved in the game and the variety of topographic settings we could choose from to place the organisms in.                                                                                                                                                  | This game was a bit less enjoyable because it was fairly solitary, you don't really collaborate or compete against your peers because everyone has their own unique game board so you're kind of just going through the motions.                 | I think maybe combining the reef systems of all the players so that everyone's actions has more of an impact on each other would make the game more fun. Working in teams in the last game encourages you to actually discuss strategy which I feel like helped tie in the science more. |
| Agree          | I liked when the corals repopulated and I enjoyed mutating my organisms.                                                                                                                                                                                                                           | Some parts of the game were really confusing. For example the mutations didn't always cancel out, I wasn't sure what to do after rolling the same mutation multiple times on one organism.                                                       | I would have really liked it if there was one large game board instead, then we could compare and contrast how our reefs were doing.                                                                                                                                                     |
| No Response    | No Response                                                                                                                                                                                                                                                                                        | No Response                                                                                                                                                                                                                                      | No Response                                                                                                                                                                                                                                                                              |
| Strongly Agree | I liked the freedom of getting to choose my own game board.                                                                                                                                                                                                                                        | I found myself always going back to look at the rules, and it would take me a lot of time to complete a turn. I had a hard time with the rules.                                                                                                  | I think the game has a lot of potential, but I felt like some reef builders were useless compared to others.                                                                                                                                                                             |
| No Response    | No Response                                                                                                                                                                                                                                                                                        | No Response                                                                                                                                                                                                                                      | No Response                                                                                                                                                                                                                                                                              |
| Neutral        | Everything was perfect. It is a very fun game.                                                                                                                                                                                                                                                     |                                                                                                                                                                                                                                                  |                                                                                                                                                                                                                                                                                          |
| Neutral        | -competing with other and learning something out of it.                                                                                                                                                                                                                                            | It was perfect!                                                                                                                                                                                                                                  | Everything was great                                                                                                                                                                                                                                                                     |

|                |                                                                                                                                                                                                                                                                                                                                                                                                                                                                                                                                                                           |                                                                                                                                                                                                                                                                                      |                                                                                                                                                                                                                                                                                                                                                                                  |
|----------------|---------------------------------------------------------------------------------------------------------------------------------------------------------------------------------------------------------------------------------------------------------------------------------------------------------------------------------------------------------------------------------------------------------------------------------------------------------------------------------------------------------------------------------------------------------------------------|--------------------------------------------------------------------------------------------------------------------------------------------------------------------------------------------------------------------------------------------------------------------------------------|----------------------------------------------------------------------------------------------------------------------------------------------------------------------------------------------------------------------------------------------------------------------------------------------------------------------------------------------------------------------------------|
| Strongly Agree | I like the competition aspect.                                                                                                                                                                                                                                                                                                                                                                                                                                                                                                                                            | There is a lot to keep track of in the game.                                                                                                                                                                                                                                         | N/a                                                                                                                                                                                                                                                                                                                                                                              |
| No Response    | No Response                                                                                                                                                                                                                                                                                                                                                                                                                                                                                                                                                               | No Response                                                                                                                                                                                                                                                                          | No Response                                                                                                                                                                                                                                                                                                                                                                      |
| Agree          | Getting to chose which reef builders I started off with                                                                                                                                                                                                                                                                                                                                                                                                                                                                                                                   | The instructions were confusing at times                                                                                                                                                                                                                                             | I really really loved the vertical slip of paper I had with simplified instructions. I found that very helpful in understanding what happens at each round of the game.                                                                                                                                                                                                          |
| Agree          | I liked how even though it was mostly an uphill battle, it did feel balanced even as we got to the later stages and corals were dropping left and right. The storms caused just the right amount of damage, while the reef dweller system was perfect for keeping algae in check.                                                                                                                                                                                                                                                                                         | I think the fact that there is a rule allowing a player to get bonus points for pointing out another player's mistake speaks to the complexity of the game. It is understandable, since it is a complex subject, but the game is indeed very difficult to get the grasp of at first. | I think it would be beneficial to have labels on the chips that are used for the corals and other organisms. It would allow us to quickly pick them out and differentiate them (esp if you have pattern recognition/colorblindness problems) instead of relying on the images alone. The carbonate algae, encrusting sponges, and microbialites, for instance, look very similar |
| Strongly Agree | I liked that there were plenty of creatures to choose from in terms of diversity and that there were a lot less disasters than the taphonomy game.                                                                                                                                                                                                                                                                                                                                                                                                                        | I disliked the counting of things because it was very repetitive and also the algae because it was always there even though we had a lot of reef dwellers.                                                                                                                           | Overall i think it was a good game, i feel like there is a bit more strategy and collaboration to this game so it might be harder for younger children.                                                                                                                                                                                                                          |
| Strongly Agree | I liked the competition because it allowed me to reflect on where I went wrong and how to improve my reef. It made me realize what is needed to grow a strong environment and learn what adaptations/mutations help in certain situations.                                                                                                                                                                                                                                                                                                                                | Overall I really liked the game and there were no moments that made me think that there could be room for improvement. It was a good balance between educational and fun, and after the first round, it was easy to follow the rules.                                                | I have no other feedback, it was a great game and I learned a good deal from it! I would love to play it again!                                                                                                                                                                                                                                                                  |
| No Response    | No Response                                                                                                                                                                                                                                                                                                                                                                                                                                                                                                                                                               | No Response                                                                                                                                                                                                                                                                          | No Response                                                                                                                                                                                                                                                                                                                                                                      |
| Agree          | I liked being able to collaborate with a partner against other teams of two                                                                                                                                                                                                                                                                                                                                                                                                                                                                                               | I thought the rules were a bit tedious at first and it was kind of hard to follow for the first few rounds.                                                                                                                                                                          | I feel like the game could be quicker/shorter altogether, maybe make the rounds faster or lose a round                                                                                                                                                                                                                                                                           |
| Neutral        | This game was enjoyable to play due to the fact that teams weren't competing against each other and that the variability in terms of factors weren't repetitive. There were many layers to how the game played out with different rounds and a chance to win more points based on focusing on certain strategies (focusing on reef builders that supported reef dwellers). The threat of having reef builders being destroyed or negatively affected via the short and long term events as well as the fleshy algae made us less complacent in our decisions in the game. | The game was pretty complicated to play in the beginning so it was a huge learning curve for playing. However, the cheat sheet made it much easier to reference what we were doing in the game. Besides that, I enjoyed most of the game mechanics and how it was structured.        | For an educational game, I think that the game serves its purpose in terms of teaching about mutations but I was wondering how the reef game would tie into speciation or adaptive radiation. I believe that this game shouldn't have those criteria since it would over complicate things.                                                                                      |
| Agree          | There were enough unexpected events to keep things interesting.                                                                                                                                                                                                                                                                                                                                                                                                                                                                                                           | It was a bit repetitive at times, and going through the reproduction process got stale at times.                                                                                                                                                                                     | No Response                                                                                                                                                                                                                                                                                                                                                                      |
| Agree          | I liked random the events were and how they affected us each differently but the same.                                                                                                                                                                                                                                                                                                                                                                                                                                                                                    | It was hard to understand things at first and I had to constantly ask my TA questions.                                                                                                                                                                                               | I wish it was more competitive. The game feels too solo compared to other games.                                                                                                                                                                                                                                                                                                 |
| Agree          | The best part of the game was strategizing how to combat certain impacts of the environmental disasters.                                                                                                                                                                                                                                                                                                                                                                                                                                                                  | My least favorite part of the game was putting the pieces on the board, and taking them off. It was so time consuming because of how many there were.                                                                                                                                | I definitely think that the educational aspect of the game is solid. However, I would focus on streamline the different phases of the game. It's to time consuming.                                                                                                                                                                                                              |

|                |                                                                                                                                                                                                                                                                                        |                                                                                                                                                                                                                                                                                      |                                                                                                                                                                     |
|----------------|----------------------------------------------------------------------------------------------------------------------------------------------------------------------------------------------------------------------------------------------------------------------------------------|--------------------------------------------------------------------------------------------------------------------------------------------------------------------------------------------------------------------------------------------------------------------------------------|---------------------------------------------------------------------------------------------------------------------------------------------------------------------|
| Neutral        | I liked that the game had incentives for the lowest scoring player and that you were scored on a round to round basis, it kept things more balanced.                                                                                                                                   | I think there is a bit too much algae given every round, I found myself overwhelmed with them and the dwellers did not do much to help that.                                                                                                                                         | n/a                                                                                                                                                                 |
| Neutral        | I liked the different reef boards, it really showed just how impactful the physical environment is on the game.                                                                                                                                                                        | There wasn't much I didn't like about the game, it just takes a while to get used to.                                                                                                                                                                                                | N/A.                                                                                                                                                                |
| No Response    | No Response                                                                                                                                                                                                                                                                            | No Response                                                                                                                                                                                                                                                                          | No Response                                                                                                                                                         |
| Strongly Agree | I liked that we were able to trade and make deals with other players.                                                                                                                                                                                                                  | I felt that tallying points was confusing and could use a bit more clarifying.                                                                                                                                                                                                       | I felt that the game was really fun and informative, thank you!                                                                                                     |
| Agree          | It was competitive and well-balanced in the fact that everyone could get points.                                                                                                                                                                                                       | I didn't like that we had to put five fleshy algae every round.                                                                                                                                                                                                                      | To make it more science-related.                                                                                                                                    |
| No Response    | No Response                                                                                                                                                                                                                                                                            | No Response                                                                                                                                                                                                                                                                          | No Response                                                                                                                                                         |
| Agree          | the way in which all of the boards are different                                                                                                                                                                                                                                       | complicated                                                                                                                                                                                                                                                                          | no                                                                                                                                                                  |
| No Response    | No Response                                                                                                                                                                                                                                                                            | No Response                                                                                                                                                                                                                                                                          | No Response                                                                                                                                                         |
| Agree          | how peaceful it mostly is, it's kind of relaxing to foster a reef community.                                                                                                                                                                                                           | The removal of algae sometimes felt useless cause I would end up removing 5, but then just adding 5 all over again.                                                                                                                                                                  | Maybe add more reef dwellers.                                                                                                                                       |
| Agree          | I liked the that we have the ability to make choices and that we would have to adapt to the effects our choices had on the game play. I got to learn along the way the best way to try to improve my coral reef. I also liked how we got to communicate with others to trade builders. | The set up was a little bit difficult and with the time given, it felt rushed near the end and we had almost skipped some steps because we were in such a rush to finish. We kept forgetting to grab from the triangle which is probably why our table had such a low point average. | I believe with someone to guide you along for the first bit, it could go by smoother, it's just difficult when everyone playing doesn't fully know what's going on. |
| Agree          | I liked the strategy of choosing which corals to mutate and where to put them. This made it feel like the way I played unique and not repetitive if I played it again                                                                                                                  | I didn't like how it wasn't very engaging in terms of the game and competitiveness aspect. The overall step and play of the game was repetitive and not very exciting                                                                                                                | I think if you make the game more engaging and interesting, students would learn from the game more                                                                 |
| Agree          | What I liked most about the game was that it forced you to think about what you were doing before you did it.                                                                                                                                                                          | It seemed like I was either playing the game wrong or other people understood the rules differently than I did. I think the rules could be a little more clear, but it was still a good game.                                                                                        | n/a                                                                                                                                                                 |

|                |                                                                                                                                                                                                                                                                                          |                                                                                                                                                                                                                                                                                                                                                                                               |                                                                                                                                                                                                                                                            |
|----------------|------------------------------------------------------------------------------------------------------------------------------------------------------------------------------------------------------------------------------------------------------------------------------------------|-----------------------------------------------------------------------------------------------------------------------------------------------------------------------------------------------------------------------------------------------------------------------------------------------------------------------------------------------------------------------------------------------|------------------------------------------------------------------------------------------------------------------------------------------------------------------------------------------------------------------------------------------------------------|
| Agree          | The collaborative element. Strategizing with a friend and with other reefs to try and improve your own was very fun.                                                                                                                                                                     | It is a little convoluted, but that's not a hard complaint. It's just that kind of game.                                                                                                                                                                                                                                                                                                      | Not really. It was a very fun game.                                                                                                                                                                                                                        |
| Strongly Agree | I liked the pictures on the corals and putting the corals on the board.                                                                                                                                                                                                                  | The instructions for reef dweller recruitment were unclear.                                                                                                                                                                                                                                                                                                                                   | The game could be a little more competitive                                                                                                                                                                                                                |
| Agree          | I liked how we many more options for survival than the last game.                                                                                                                                                                                                                        | I liked everything.                                                                                                                                                                                                                                                                                                                                                                           | Nope, it was perfect.                                                                                                                                                                                                                                      |
| Strongly Agree | I liked the trading with other players, building deals and making bets was fun.                                                                                                                                                                                                          | This ones rules and material were a lot more complex, and it took my a bit longer to get the hang of what was going on. The pre lab strategizing didn't really help that much compared to just figuring it out by playing.                                                                                                                                                                    | maybe put labels on the organisms or a brightly colored background because they all kind of look similar and it can be hard when counting for diversity.                                                                                                   |
| Strongly Agree | I liked how we were on teams for this game, also how we got to choose our own board game!                                                                                                                                                                                                | I didn't feel like we were playing against another team much. If i was to play this game not on a team, I would feel like I'm playing the game alone. There wasn't that much engagement with the other players. It also took a lot of time to take the pieces on and off the board, it was a bit too meticulous for my preference.                                                            | No!                                                                                                                                                                                                                                                        |
| Strongly Agree | I like that the game allowed me to compete and strategize how to win the game. I learned a lot more because I got to process everything in my mind before I moved any of my pieces. It was almost like a game of chess in my opinion.                                                    | I really did not like that the instructions to the game were so long. I get that the instructions are a vital part in the game but if they could be shorten I would do that. Other than that the game was really fun and I enjoyed it.                                                                                                                                                        | No overall the game was really interesting and fun to play!!                                                                                                                                                                                               |
| Agree          | I liked the diversity of the disasters, and how it helped me understand how real life coral reefs can be affected by various disasters/environmental changes.                                                                                                                            | I wish the game was more competitive                                                                                                                                                                                                                                                                                                                                                          | Maybe have more interaction between each player's reefs, like along with trading maybe have possibilities to sabotage or interact with their reef                                                                                                          |
| Strongly Agree | I really enjoyed the collaborative aspect of the game. It helped me to learn the material better. The building stages of the game were very fun. You got to choose your organisms, mutate them, and trade juveniles with others. That was by far my favorite part of the game.           | Some of the rules were a little hard to follow, especially at first. It took time for everybody to really get into the cycle of the game play. My partner and I already had ideas going into the game because we read the rules ahead of time, but if I were to play this with my family or other friends who are not as well versed in geology, they might have trouble figuring things out. | Overall, I liked this game a lot more than the taphonomy game from lab 5. The environmental dangers felt a lot more real, and I felt very protective of my reef! This might be due to the fact that the organisms are still alive in this game. Great job! |
| Neutral        | Nice illustrations                                                                                                                                                                                                                                                                       | Pre lab assignment too long                                                                                                                                                                                                                                                                                                                                                                   | No Response                                                                                                                                                                                                                                                |
| Strongly Agree | How we got to trade organisms after every round.                                                                                                                                                                                                                                         | How time consuming it was.                                                                                                                                                                                                                                                                                                                                                                    | Nope!                                                                                                                                                                                                                                                      |
| Strongly Agree | I liked the fact that there was both a collaborative aspect and a competitive aspect. Strategizing with someone else rather than just on my own helped me familiarize myself with all of the material rather than focusing in on one aspect. The competition between teams was also fun. | There was a bit of confusion around the bonus points in our game, but that was really the only difficulty we had! We couldn't tell whether meeting the bonus point requirement for certain achievements several times over affected the point value.                                                                                                                                          | Nope! It was a really fun, informative game!                                                                                                                                                                                                               |
| No Response    | No Response                                                                                                                                                                                                                                                                              | No Response                                                                                                                                                                                                                                                                                                                                                                                   | No Response                                                                                                                                                                                                                                                |

Neutral

The other players I played with helped me figure out the rules

There was definitely a learning curve at the beginning

Less "moving parts" to keep track of

No Response

No Response

No Response

No Response

| What sort of school do you attend?                                                 | I am a                                               | What is your major?                                                                | How much did you know about evolution, ecology, and extinction before taking this class? | I played "Reef Survivor" during | I played "Reef Survivor" using                            | I played the game:                                                             | How much do you know about board games (played in person)? | How much do you know about online or digital games (for example, games on your phone, online board games, computer games, etc.)? | Which type of game do you enjoy most: collaborative games (i.e., solving something together with teammates) or competitive games (i.e., more one-on-one or against others)? |
|------------------------------------------------------------------------------------|------------------------------------------------------|------------------------------------------------------------------------------------|------------------------------------------------------------------------------------------|---------------------------------|-----------------------------------------------------------|--------------------------------------------------------------------------------|------------------------------------------------------------|----------------------------------------------------------------------------------------------------------------------------------|-----------------------------------------------------------------------------------------------------------------------------------------------------------------------------|
| Public or State University (e.g., University of Texas or University of California) | Junior (Third-year undergraduate student)            | I am a geoscience major (e.g., geology, geophysics, Earth sciences)                | A lot, I am an expert                                                                    | a lab period                    | a professionally printed version of the game              | In a team of 3 or more (i.e., 3+ people worked together on one reef gameboard) | A lot, I am an expert gamer                                | Quite a bit, I often play online or digital games                                                                                | I prefer collaborative games (i.e., solving something together with teammates)                                                                                              |
| Public or State University (e.g., University of Texas or University of California) | Junior (Third-year undergraduate student)            | I am a geoscience major (e.g., geology, geophysics, Earth sciences)                | A lot, I am an expert                                                                    | a lab period                    | a professionally printed version of the game              | In a team of 3 or more (i.e., 3+ people worked together on one reef gameboard) | I play board games every now and then                      | Quite a bit, I often play online or digital games                                                                                | I like both collaborative and competitive games                                                                                                                             |
| Public or State University (e.g., University of Texas or University of California) | Junior (Third-year undergraduate student)            | I am a geoscience major (e.g., geology, geophysics, Earth sciences)                | I knew a few things                                                                      | a lab period                    | a professionally printed version of the game              | Solo (i.e., I was the only person responsible for my reef board)               | Quite a bit, I often play board games                      | Quite a bit, I often play online or digital games                                                                                | I like both collaborative and competitive games                                                                                                                             |
| Public or State University (e.g., University of Texas or University of California) | Junior (Third-year undergraduate student)            | I am a geoscience major (e.g., geology, geophysics, Earth sciences)                | Quite a bit                                                                              | a lab period                    | a paper version of the game (i.e., printed on card stock) | Solo (i.e., I was the only person responsible for my reef board)               | I rarely play board games                                  | Quite a bit, I often play online or digital games                                                                                | I like both collaborative and competitive games                                                                                                                             |
| Public or State University (e.g., University of Texas or University of California) | Senior (Fourth-year undergraduate student) or higher | I am a geoscience major (e.g., geology, geophysics, Earth sciences)                | A lot, I am an expert                                                                    | a lab period                    | a professionally printed version of the game              | Solo (i.e., I was the only person responsible for my reef board)               | A lot, I am an expert gamer                                | A lot, I am an expert!                                                                                                           | I like both collaborative and competitive games                                                                                                                             |
| Public or State University (e.g., University of Texas or University of California) | Junior (Third-year undergraduate student)            | I am a geoscience major (e.g., geology, geophysics, Earth sciences)                | Quite a bit                                                                              | a lab period                    | a professionally printed version of the game              | Solo (i.e., I was the only person responsible for my reef board)               | A lot, I am an expert gamer                                | I play online or digital games every now and then                                                                                | I like both collaborative and competitive games                                                                                                                             |
| Public or State University (e.g., University of Texas or University of California) | Senior (Fourth-year undergraduate student) or higher | I am a geoscience major (e.g., geology, geophysics, Earth sciences)                | Quite a bit                                                                              | a lab period                    | a professionally printed version of the game              | Solo (i.e., I was the only person responsible for my reef board)               | A lot, I am an expert gamer                                | A lot, I am an expert!                                                                                                           | I prefer collaborative games (i.e., solving something together with teammates)                                                                                              |
| Public or State University (e.g., University of Texas or University of California) | Master's student                                     | I am a geoscience major (e.g., geology, geophysics, Earth sciences)                | Quite a bit                                                                              | a lab period                    | a professionally printed version of the game              | Solo (i.e., I was the only person responsible for my reef board)               | A lot, I am an expert gamer                                | A lot, I am an expert!                                                                                                           | I like both collaborative and competitive games                                                                                                                             |
| Public or State University (e.g., University of Texas or University of California) |                                                      |                                                                                    |                                                                                          |                                 |                                                           |                                                                                |                                                            |                                                                                                                                  |                                                                                                                                                                             |
| Public or State University (e.g., University of Texas or University of California) |                                                      |                                                                                    |                                                                                          |                                 |                                                           |                                                                                |                                                            |                                                                                                                                  |                                                                                                                                                                             |
| Public or State University (e.g., University of Texas or University of California) |                                                      |                                                                                    |                                                                                          |                                 |                                                           |                                                                                |                                                            |                                                                                                                                  |                                                                                                                                                                             |
| Public or State University (e.g., University of Texas or University of California) |                                                      |                                                                                    |                                                                                          |                                 |                                                           |                                                                                |                                                            |                                                                                                                                  |                                                                                                                                                                             |
| Public or State University (e.g., University of Texas or University of California) |                                                      |                                                                                    |                                                                                          |                                 |                                                           |                                                                                |                                                            |                                                                                                                                  |                                                                                                                                                                             |
| Private University (e.g., Harvard University, MIT, or CalTech)                     | Freshman (First-year undergraduate student)          | I am a bioscience major (e.g., biology, ecology, integrated biology, biochemistry) | I knew a few things                                                                      | a classroom period              | a professionally printed version of the game              | In a team of 3 or more (i.e., 3+ people worked together on one reef gameboard) | I never play board games                                   | I rarely play online or digital games                                                                                            | I like both collaborative and competitive games                                                                                                                             |

|                                                                  |                                                      |                                                                                    |                     |                    |                                                           |                                                                                |                                       |                                                   |                                                                                |
|------------------------------------------------------------------|------------------------------------------------------|------------------------------------------------------------------------------------|---------------------|--------------------|-----------------------------------------------------------|--------------------------------------------------------------------------------|---------------------------------------|---------------------------------------------------|--------------------------------------------------------------------------------|
| Liberal Arts College (e.g., Williams College or Amherst College) | Senior (Fourth-year undergraduate student) or higher | I am a bioscience major (e.g., biology, ecology, integrated biology, biochemistry) | Quite a bit         | a lab period       | a professionally printed version of the game              | Solo (i.e., I was the only person responsible for my reef board)               | I rarely play board games             | I play online or digital games every now and then | I like both collaborative and competitive games                                |
| Liberal Arts College (e.g., Williams College or Amherst College) | Senior (Fourth-year undergraduate student) or higher | I am a geoscience major (e.g., geology, geophysics, Earth sciences)                | Quite a bit         | a lab period       | a paper version of the game (i.e., printed on card stock) | Solo (i.e., I was the only person responsible for my reef board)               | I play board games every now and then | Quite a bit, I often play online or digital games | I like both collaborative and competitive games                                |
| Liberal Arts College (e.g., Williams College or Amherst College) | Sophomore (Second-year undergraduate student)        | I am a geoscience major (e.g., geology, geophysics, Earth sciences)                | I knew a few things | a lab period       | a professionally printed version of the game              | In a team of 3 or more (i.e., 3+ people worked together on one reef gameboard) | I play board games every now and then | I play online or digital games every now and then | I like both collaborative and competitive games                                |
| Liberal Arts College (e.g., Williams College or Amherst College) | Junior (Third-year undergraduate student)            | I am a geoscience major (e.g., geology, geophysics, Earth sciences)                | Quite a bit         | a lab period       | a professionally printed version of the game              | In a team of 3 or more (i.e., 3+ people worked together on one reef gameboard) | I play board games every now and then | I never play online or digital games              | I prefer competitive games (i.e., more one-on-one or against others)           |
| Liberal Arts College (e.g., Williams College or Amherst College) | Junior (Third-year undergraduate student)            | I am a geoscience major (e.g., geology, geophysics, Earth sciences)                | Quite a bit         | a lab period       | a professionally printed version of the game              | Solo (i.e., I was the only person responsible for my reef board)               | I play board games every now and then | I rarely play online or digital games             | I prefer competitive games (i.e., more one-on-one or against others)           |
| Private Liberal Arts                                             | Junior (Third-year undergraduate student)            | I am a geoscience major (e.g., geology, geophysics, Earth sciences)                | Quite a bit         | a lab period       | a professionally printed version of the game              | Solo (i.e., I was the only person responsible for my reef board)               | I play board games every now and then | I rarely play online or digital games             | I like both collaborative and competitive games                                |
| 4-year Community College                                         | Junior (Third-year undergraduate student)            | I am a geoscience major (e.g., geology, geophysics, Earth sciences)                | Quite a bit         | a lab period       | a professionally printed version of the game              | Solo (i.e., I was the only person responsible for my reef board)               | A lot, I am an expert gamer           | I play online or digital games every now and then | I like both collaborative and competitive games                                |
| Liberal Arts College (e.g., Williams College or Amherst College) | Junior (Third-year undergraduate student)            | I am a bioscience major (e.g., biology, ecology, integrated biology, biochemistry) | Quite a bit         | a lab period       | a professionally printed version of the game              | Solo (i.e., I was the only person responsible for my reef board)               | I play board games every now and then | I play online or digital games every now and then | I like both collaborative and competitive games                                |
| Liberal Arts College (e.g., Williams College or Amherst College) | Junior (Third-year undergraduate student)            | I am a geoscience major (e.g., geology, geophysics, Earth sciences)                | Quite a bit         | a lab period       | a professionally printed version of the game              | Solo (i.e., I was the only person responsible for my reef board)               | Quite a bit, I often play board games | Quite a bit, I often play online or digital games | I like both collaborative and competitive games                                |
| Liberal Arts College (e.g., Williams College or Amherst College) | Junior (Third-year undergraduate student)            | I am a bioscience major (e.g., biology, ecology, integrated biology, biochemistry) | Quite a bit         | a lab period       | a professionally printed version of the game              | Solo (i.e., I was the only person responsible for my reef board)               | I rarely play board games             | I play online or digital games every now and then | I like both collaborative and competitive games                                |
| Private University (e.g., Harvard University, MIT, or CalTech)   | Junior (Third-year undergraduate student)            | I am a geoscience major (e.g., geology, geophysics, Earth sciences)                | Quite a bit         | a classroom period | a professionally printed version of the game              | Solo (i.e., I was the only person responsible for my reef board)               | A lot, I am an expert gamer           | Quite a bit, I often play online or digital games | I like both collaborative and competitive games                                |
| Private University (e.g., Harvard University, MIT, or CalTech)   | PhD Student                                          | I am a geoscience major (e.g., geology, geophysics, Earth sciences)                | I knew a few things | a classroom period | a professionally printed version of the game              | Solo (i.e., I was the only person responsible for my reef board)               | I play board games every now and then | I play online or digital games every now and then | I like both collaborative and competitive games                                |
| Private University (e.g., Harvard University, MIT, or CalTech)   | Junior (Third-year undergraduate student)            | I am a bioscience major (e.g., biology, ecology, integrated biology, biochemistry) | Quite a bit         | a classroom period | a professionally printed version of the game              | Solo (i.e., I was the only person responsible for my reef board)               | I rarely play board games             | Quite a bit, I often play online or digital games | I like both collaborative and competitive games                                |
| Private University (e.g., Harvard University, MIT, or CalTech)   | Senior (Fourth-year undergraduate student) or higher | I am a bioscience major (e.g., biology, ecology, integrated biology, biochemistry) | I knew a few things | a classroom period | a professionally printed version of the game              | In a team of 3 or more (i.e., 3+ people worked together on one reef gameboard) | Quite a bit, I often play board games | I rarely play online or digital games             | I prefer competitive games (i.e., more one-on-one or against others)           |
| Private University (e.g., Harvard University, MIT, or CalTech)   | PhD Student                                          | I am a bioscience major (e.g., biology, ecology, integrated biology, biochemistry) | Quite a bit         | a classroom period | a professionally printed version of the game              | Solo (i.e., I was the only person responsible for my reef board)               | I rarely play board games             | Quite a bit, I often play online or digital games | I prefer collaborative games (i.e., solving something together with teammates) |
| Private University (e.g., Harvard University, MIT, or CalTech)   | PhD Student                                          | I am a geoscience major (e.g., geology, geophysics, Earth sciences)                | I knew a few things | a classroom period | a professionally printed version of the game              | Solo (i.e., I was the only person responsible for my reef board)               | I play board games every now and then | Quite a bit, I often play online or digital games | I prefer collaborative games (i.e., solving something together with teammates) |



|                                                                                    |                                                      |                                                                                                         |                     |                    |                                                           |                                                                                |                                       |                                                   |                                                                                |
|------------------------------------------------------------------------------------|------------------------------------------------------|---------------------------------------------------------------------------------------------------------|---------------------|--------------------|-----------------------------------------------------------|--------------------------------------------------------------------------------|---------------------------------------|---------------------------------------------------|--------------------------------------------------------------------------------|
| Private University (e.g., Harvard University, MIT, or CalTech)                     | Senior (Fourth-year undergraduate student) or higher | I am another STEM (Science, Technology, Engineering or Math) major (e.g. physics, chemical engineering) | I knew very little  | a classroom period | a professionally printed version of the game              | Solo (i.e., I was the only person responsible for my reef board)               | I play board games every now and then | Quite a bit, I often play online or digital games | I prefer collaborative games (i.e., solving something together with teammates) |
| Private University (e.g., Harvard University, MIT, or CalTech)                     | PhD Student                                          | I am a geoscience major (e.g., geology, geophysics, Earth sciences)                                     | I knew a few things | a classroom period | a paper version of the game (i.e., printed on card stock) | In a team of 3 or more (i.e., 3+ people worked together on one reef gameboard) | I rarely play board games             | I never play online or digital games              | I prefer competitive games (i.e., more one-on-one or against others)           |
| Private University (e.g., Harvard University, MIT, or CalTech)                     | Senior (Fourth-year undergraduate student) or higher | I am a bioscience major (e.g., biology, ecology, integrated biology, biochemistry)                      | Quite a bit         | a classroom period | a professionally printed version of the game              | Solo (i.e., I was the only person responsible for my reef board)               | Quite a bit, I often play board games | Quite a bit, I often play online or digital games | I like both collaborative and competitive games                                |
| Private University (e.g., Harvard University, MIT, or CalTech)                     | Sophomore (Second-year undergraduate student)        | I am a geoscience major (e.g., geology, geophysics, Earth sciences)                                     | Quite a bit         | a classroom period | a professionally printed version of the game              | Solo (i.e., I was the only person responsible for my reef board)               | I play board games every now and then | Quite a bit, I often play online or digital games | I prefer competitive games (i.e., more one-on-one or against others)           |
| Private University (e.g., Harvard University, MIT, or CalTech)                     |                                                      |                                                                                                         |                     |                    |                                                           |                                                                                |                                       |                                                   |                                                                                |
| Public or State University (e.g., University of Texas or University of California) | Freshman (First-year undergraduate student)          | I am another STEM (Science, Technology, Engineering or Math) major (e.g. physics, chemical engineering) | I knew a few things | a classroom period | a professionally printed version of the game              | Solo (i.e., I was the only person responsible for my reef board)               | I rarely play board games             | I play online or digital games every now and then | I like both collaborative and competitive games                                |
| Public or State University (e.g., University of Texas or University of California) | Junior (Third-year undergraduate student)            | Not applicable/Choose not to answer                                                                     | I knew a few things | a classroom period | a paper version of the game (i.e., printed on card stock) | In a team of two (i.e., 2 people worked together on one reef gameboard)        | I never play board games              | I rarely play online or digital games             | I like both collaborative and competitive games                                |
| Public or State University (e.g., University of Texas or University of California) | Junior (Third-year undergraduate student)            | I am a geoscience major (e.g., geology, geophysics, Earth sciences)                                     | I knew a few things | a classroom period | a professionally printed version of the game              | Solo (i.e., I was the only person responsible for my reef board)               | Quite a bit, I often play board games | A lot, I am an expert!                            | I prefer collaborative games (i.e., solving something together with teammates) |
| Public or State University (e.g., University of Texas or University of California) |                                                      |                                                                                                         |                     |                    |                                                           |                                                                                |                                       |                                                   |                                                                                |
| Public or State University (e.g., University of Texas or University of California) |                                                      |                                                                                                         |                     |                    |                                                           |                                                                                |                                       |                                                   |                                                                                |
| Public or State University (e.g., University of Texas or University of California) |                                                      |                                                                                                         |                     |                    |                                                           |                                                                                |                                       |                                                   |                                                                                |
| Public or State University (e.g., University of Texas or University of California) |                                                      |                                                                                                         |                     |                    |                                                           |                                                                                |                                       |                                                   |                                                                                |
| Public or State University (e.g., University of Texas or University of California) |                                                      |                                                                                                         |                     |                    |                                                           |                                                                                |                                       |                                                   |                                                                                |
| Public or State University (e.g., University of Texas or University of California) |                                                      |                                                                                                         |                     |                    |                                                           |                                                                                |                                       |                                                   |                                                                                |
| Public or State University (e.g., University of Texas or University of California) | Junior (Third-year undergraduate student)            | I am a geoscience major (e.g., geology, geophysics, Earth sciences)                                     | Quite a bit         | a lab period       | a paper version of the game (i.e., printed on card stock) | Solo (i.e., I was the only person responsible for my reef board)               | Quite a bit, I often play board games | Quite a bit, I often play online or digital games | I prefer competitive games (i.e., more one-on-one or against others)           |
| Public or State University (e.g., University of Texas or University of California) | Senior (Fourth-year undergraduate student) or higher | I am a geoscience major (e.g., geology, geophysics, Earth sciences)                                     | Quite a bit         | a lab period       | a professionally printed version of the game              | In a team of 3 or more (i.e., 3+ people worked together on one reef gameboard) | Quite a bit, I often play board games | Quite a bit, I often play online or digital games | I like both collaborative and competitive games                                |
| Public or State University (e.g., University of Texas or University of California) | Senior (Fourth-year undergraduate student) or higher | I am a geoscience major (e.g., geology, geophysics, Earth sciences)                                     | I knew a few things | a lab period       | a professionally printed version of the game              | In a team of 3 or more (i.e., 3+ people worked together on one reef gameboard) | I play board games every now and then | Quite a bit, I often play online or digital games | I prefer competitive games (i.e., more one-on-one or against others)           |

|                                                                                    |                                                      |                                                                                                                                                                                             |                     |                    |                                              |                                                                                                                                                  |                                       |                                                                                                      |                                                                                                                       |
|------------------------------------------------------------------------------------|------------------------------------------------------|---------------------------------------------------------------------------------------------------------------------------------------------------------------------------------------------|---------------------|--------------------|----------------------------------------------|--------------------------------------------------------------------------------------------------------------------------------------------------|---------------------------------------|------------------------------------------------------------------------------------------------------|-----------------------------------------------------------------------------------------------------------------------|
| Public or State University (e.g., University of Texas or University of California) | Senior (Fourth-year undergraduate student) or higher | I am a geoscience major (e.g., geology, geophysics, Earth sciences)                                                                                                                         | I knew a few things | a lab period       | a professionally printed version of the game | In a team of 3 or more (i.e., 3+ people worked together on one reef gameboard)                                                                   | I play board games every now and then | Quite a bit, I often play online or digital games                                                    | I prefer competitive games (i.e., more one-on-one or against others)                                                  |
| Public or State University (e.g., University of Texas or University of California) | Senior (Fourth-year undergraduate student) or higher | I am a bioscience major (e.g., biology, ecology, integrated biology, biochemistry)                                                                                                          | Quite a bit         | a lab period       | Other                                        | In a team of 3 or more (i.e., 3+ people worked together on one reef gameboard)                                                                   | I play board games every now and then | I play online or digital games every now and then                                                    | I prefer competitive games (i.e., more one-on-one or against others)                                                  |
| Public or State University (e.g., University of Texas or University of California) | Junior (Third-year undergraduate student)            | I am a geoscience major (e.g., geology, geophysics, Earth sciences)                                                                                                                         | Quite a bit         | a lab period       | a professionally printed version of the game | In a team of 3 or more (i.e., 3+ people worked together on one reef gameboard)                                                                   | I play board games every now and then | A lot, I am an expert!                                                                               | I prefer competitive games (i.e., more one-on-one or against others)                                                  |
| Public or State University (e.g., University of Texas or University of California) | Senior (Fourth-year undergraduate student) or higher | I am a geoscience major (e.g., geology, geophysics, Earth sciences)                                                                                                                         | Quite a bit         | a lab period       | a professionally printed version of the game | Solo (i.e., I was the only person responsible for my reef board)                                                                                 | Quite a bit, I often play board games | Quite a bit, I often play online or digital games                                                    | I prefer competitive games (i.e., more one-on-one or against others)                                                  |
| Public or State University (e.g., University of Texas or University of California) | Junior (Third-year undergraduate student)            | I am a geoscience major (e.g., geology, geophysics, Earth sciences)                                                                                                                         | I knew a few things | a lab period       | a professionally printed version of the game | In a team of 3 or more (i.e., 3+ people worked together on one reef gameboard)                                                                   | Quite a bit, I often play board games | I play online or digital games every now and then                                                    | I like both collaborative and competitive games                                                                       |
| Public or State University (e.g., University of Texas or University of California) | Sophomore (Second-year undergraduate student)        | I am a geoscience major (e.g., geology, geophysics, Earth sciences)                                                                                                                         | I knew a few things | a lab period       | a professionally printed version of the game | Solo (i.e., I was the only person responsible for my reef board)                                                                                 | I play board games every now and then | Quite a bit, I often play online or digital games                                                    | I like both collaborative and competitive games                                                                       |
| Public or State University (e.g., University of Texas or University of California) | Senior (Fourth-year undergraduate student) or higher | I am a geoscience major (e.g., geology, geophysics, Earth sciences)                                                                                                                         | Quite a bit         | a lab period       | a professionally printed version of the game | In a team of 3 or more (i.e., 3+ people worked together on one reef gameboard)                                                                   | Quite a bit, I often play board games | Quite a bit, I often play online or digital games                                                    | I prefer competitive games (i.e., more one-on-one or against others)                                                  |
| Public or State University (e.g., University of Texas or University of California) |                                                      |                                                                                                                                                                                             |                     |                    |                                              |                                                                                                                                                  |                                       |                                                                                                      |                                                                                                                       |
| Public or State University (e.g., University of Texas or University of California) |                                                      |                                                                                                                                                                                             |                     |                    |                                              |                                                                                                                                                  |                                       |                                                                                                      |                                                                                                                       |
| Public or State University (e.g., University of Texas or University of California) |                                                      |                                                                                                                                                                                             |                     |                    |                                              |                                                                                                                                                  |                                       |                                                                                                      |                                                                                                                       |
| Public or State University (e.g., University of Texas or University of California) |                                                      |                                                                                                                                                                                             |                     |                    |                                              |                                                                                                                                                  |                                       |                                                                                                      |                                                                                                                       |
| Public or State University (e.g., University of Texas or University of California) |                                                      |                                                                                                                                                                                             |                     |                    |                                              |                                                                                                                                                  |                                       |                                                                                                      |                                                                                                                       |
| Liberal Arts College (e.g., Williams College or Amherst College)                   | Junior (Third-year undergraduate student)            | I am a bioscience major (e.g., biology, ecology, integrated biology, biochemistry), I am another STEM (Science, Technology, Engineering or Math) major (e.g. physics, chemical engineering) | I knew a few things | a classroom period | a professionally printed version of the game | Solo (i.e., I was the only person responsible for my reef board), In a team of 3 or more (i.e., 3+ people worked together on one reef gameboard) | I play board games every now and then | I play online or digital games every now and then, Quite a bit, I often play online or digital games | I prefer competitive games (i.e., more one-on-one or against others), I like both collaborative and competitive games |
| Private University (e.g., Harvard University, MIT, or CalTech)                     | Senior (Fourth-year undergraduate student) or higher | I am a bioscience major (e.g., biology, ecology, integrated biology, biochemistry)                                                                                                          | I knew a few things | a classroom period | a professionally printed version of the game | In a team of 3 or more (i.e., 3+ people worked together on one reef gameboard)                                                                   | Quite a bit, I often play board games | Quite a bit, I often play online or digital games                                                    | I prefer competitive games (i.e., more one-on-one or against others)                                                  |

|                                                                                    |                                                      |                                                                                                         |                       |                    |                                                           |                                                                                                                                                         |                                                                              |                                                                                          |                                                                                |
|------------------------------------------------------------------------------------|------------------------------------------------------|---------------------------------------------------------------------------------------------------------|-----------------------|--------------------|-----------------------------------------------------------|---------------------------------------------------------------------------------------------------------------------------------------------------------|------------------------------------------------------------------------------|------------------------------------------------------------------------------------------|--------------------------------------------------------------------------------|
| Private University (e.g., Harvard University, MIT, or CalTech)                     | Junior (Third-year undergraduate student)            | I am a bioscience major (e.g., biology, ecology, integrated biology, biochemistry)                      | Quite a bit           | a classroom period | a professionally printed version of the game              | Solo (i.e., I was the only person responsible for my reef board)                                                                                        | I play board games every now and then                                        | I play online or digital games every now and then                                        | I prefer competitive games (i.e., more one-on-one or against others)           |
| Private University (e.g., Harvard University, MIT, or CalTech)                     | Senior (Fourth-year undergraduate student) or higher | I am another STEM (Science, Technology, Engineering or Math) major (e.g. physics, chemical engineering) | I knew very little    | a classroom period | a professionally printed version of the game              | In a team of two (i.e., 2 people worked together on one reef gameboard), In a team of 3 or more (i.e., 3+ people worked together on one reef gameboard) | Quite a bit, I often play board games, I play board games every now and then | I rarely play online or digital games, I play online or digital games every now and then | I like both collaborative and competitive games                                |
| Private Liberal Arts College                                                       | Junior (Third-year undergraduate student)            | I am a bioscience major (e.g., biology, ecology, integrated biology, biochemistry)                      | Quite a bit           | a classroom period | a paper version of the game (i.e., printed on card stock) | Solo (i.e., I was the only person responsible for my reef board)                                                                                        | I play board games every now and then                                        | I play online or digital games every now and then                                        | I like both collaborative and competitive games                                |
| Private University (e.g., Harvard University, MIT, or CalTech)                     | Junior (Third-year undergraduate student)            | I am a bioscience major (e.g., biology, ecology, integrated biology, biochemistry)                      | I knew a few things   | a classroom period | a professionally printed version of the game              | Solo (i.e., I was the only person responsible for my reef board)                                                                                        | Quite a bit, I often play board games                                        | I play online or digital games every now and then                                        | I like both collaborative and competitive games                                |
| Liberal Arts College (e.g., Williams College or Amherst College)                   | Junior (Third-year undergraduate student)            | I am a non STEM major (e.g., history, social work, art)                                                 | I knew a few things   | a classroom period | a professionally printed version of the game              | In a team of 3 or more (i.e., 3+ people worked together on one reef gameboard)                                                                          | Quite a bit, I often play board games                                        | A lot, I am an expert!                                                                   | I prefer collaborative games (i.e., solving something together with teammates) |
| Liberal Arts College (e.g., Williams College or Amherst College)                   | Senior (Fourth-year undergraduate student) or higher | I am a geoscience major (e.g., geology, geophysics, Earth sciences)                                     | Quite a bit           | a classroom period | a professionally printed version of the game              | In a team of 3 or more (i.e., 3+ people worked together on one reef gameboard)                                                                          | Quite a bit, I often play board games                                        | A lot, I am an expert!                                                                   | I like both collaborative and competitive games                                |
| Public or State University (e.g., University of Texas or University of California) | Senior (Fourth-year undergraduate student) or higher | I am a geoscience major (e.g., geology, geophysics, Earth sciences)                                     | Quite a bit           | a lab period       | a professionally printed version of the game              | In a team of two (i.e., 2 people worked together on one reef gameboard)                                                                                 | Quite a bit, I often play board games                                        | Quite a bit, I often play online or digital games                                        | I like both collaborative and competitive games                                |
| Public or State University (e.g., University of Texas or University of California) | Non traditional Undergraduate Student                | I am a geoscience major (e.g., geology, geophysics, Earth sciences)                                     | Quite a bit           | a lab period       | a professionally printed version of the game              | In a team of two (i.e., 2 people worked together on one reef gameboard)                                                                                 | A lot, I am an expert gamer                                                  | A lot, I am an expert!                                                                   | I like both collaborative and competitive games                                |
| Whatever kinda school Texas Tech is                                                | Junior (Third-year undergraduate student)            | I am a geoscience major (e.g., geology, geophysics, Earth sciences)                                     | A lot, I am an expert | a lab period       | a professionally printed version of the game              | In a team of two (i.e., 2 people worked together on one reef gameboard)                                                                                 | I play board games every now and then                                        | Quite a bit, I often play online or digital games                                        | I prefer competitive games (i.e., more one-on-one or against others)           |
| Public or State University (e.g., University of Texas or University of California) | Senior (Fourth-year undergraduate student) or higher | I am a geoscience major (e.g., geology, geophysics, Earth sciences)                                     | Quite a bit           | a lab period       | a professionally printed version of the game              | In a team of two (i.e., 2 people worked together on one reef gameboard)                                                                                 | I play board games every now and then                                        | Quite a bit, I often play online or digital games                                        | I like both collaborative and competitive games                                |
| 2-year Community College or Junior College                                         | Junior (Third-year undergraduate student)            | I am a geoscience major (e.g., geology, geophysics, Earth sciences)                                     | Quite a bit           | a lab period       | a professionally printed version of the game              | In a team of two (i.e., 2 people worked together on one reef gameboard)                                                                                 | I rarely play board games                                                    | I play online or digital games every now and then                                        | I like both collaborative and competitive games                                |
| Public or State University (e.g., University of Texas or University of California) | Freshman (First-year undergraduate student)          | I am undeclared                                                                                         | I knew very little    | a classroom period | a paper version of the game (i.e., printed on card stock) | In a team of two (i.e., 2 people worked together on one reef gameboard)                                                                                 | I rarely play board games                                                    | I rarely play online or digital games                                                    | I prefer competitive games (i.e., more one-on-one or against others)           |
| Public or State University (e.g., University of Texas or University of California) | Freshman (First-year undergraduate student)          | I am a non STEM major (e.g., history, social work, art)                                                 | Quite a bit           | a classroom period | a professionally printed version of the game              | In a team of two (i.e., 2 people worked together on one reef gameboard)                                                                                 | Quite a bit, I often play board games                                        | Quite a bit, I often play online or digital games                                        | I prefer collaborative games (i.e., solving something together with teammates) |
| Public or State University (e.g., University of Texas or University of California) | Senior (Fourth-year undergraduate student) or higher | Not applicable/Choose not to answer                                                                     | I knew a few things   | a classroom period | Other                                                     | Solo (i.e., I was the only person responsible for my reef board)                                                                                        | Quite a bit, I often play board games                                        | A lot, I am an expert!                                                                   | I like both collaborative and competitive games                                |

[illegible]



|                                                                                    |                  |                                                                                    |                     |                    |                                                           |                                                                                |                                       |                                                   |                                                                                |
|------------------------------------------------------------------------------------|------------------|------------------------------------------------------------------------------------|---------------------|--------------------|-----------------------------------------------------------|--------------------------------------------------------------------------------|---------------------------------------|---------------------------------------------------|--------------------------------------------------------------------------------|
| Public or State University (e.g., University of Texas or University of California) |                  |                                                                                    |                     |                    |                                                           |                                                                                |                                       |                                                   |                                                                                |
| Public or State University (e.g., University of Texas or University of California) |                  |                                                                                    |                     |                    |                                                           |                                                                                |                                       |                                                   |                                                                                |
| Public or State University (e.g., University of Texas or University of California) |                  |                                                                                    |                     |                    |                                                           |                                                                                |                                       |                                                   |                                                                                |
| Public or State University (e.g., University of Texas or University of California) |                  |                                                                                    |                     |                    |                                                           |                                                                                |                                       |                                                   |                                                                                |
| Public or State University (e.g., University of Texas or University of California) |                  |                                                                                    |                     |                    |                                                           |                                                                                |                                       |                                                   |                                                                                |
| Public or State University (e.g., University of Texas or University of California) | PhD Student      | I am a bioscience major (e.g., biology, ecology, integrated biology, biochemistry) | Quite a bit         | a classroom period | a professionally printed version of the game              | Solo (i.e., I was the only person responsible for my reef board)               | Quite a bit, I often play board games | Quite a bit, I often play online or digital games | I prefer collaborative games (i.e., solving something together with teammates) |
| Public or State University (e.g., University of Texas or University of California) | Master's student | I am a bioscience major (e.g., biology, ecology, integrated biology, biochemistry) | Quite a bit         | a classroom period | a professionally printed version of the game              | Solo (i.e., I was the only person responsible for my reef board)               | I play board games every now and then | Quite a bit, I often play online or digital games | I like both collaborative and competitive games                                |
| Public or State University (e.g., University of Texas or University of California) | PhD Student      | I am a geoscience major (e.g., geology, geophysics, Earth sciences)                | I knew very little  | a classroom period | a professionally printed version of the game              | In a team of 3 or more (i.e., 3+ people worked together on one reef gameboard) | A lot, I am an expert gamer           | A lot, I am an expert!                            | I like both collaborative and competitive games                                |
| Public or State University (e.g., University of Texas or University of California) | PhD Student      | I am a bioscience major (e.g., biology, ecology, integrated biology, biochemistry) | Quite a bit         | a classroom period | Other                                                     | Solo (i.e., I was the only person responsible for my reef board)               | A lot, I am an expert gamer           | A lot, I am an expert!                            | I prefer competitive games (i.e., more one-on-one or against others)           |
| Public or State University (e.g., University of Texas or University of California) | PhD Student      | I am a bioscience major (e.g., biology, ecology, integrated biology, biochemistry) | I knew a few things | a classroom period | Other                                                     | In a team of 3 or more (i.e., 3+ people worked together on one reef gameboard) | A lot, I am an expert gamer           | A lot, I am an expert!                            | I like both collaborative and competitive games                                |
| Public or State University (e.g., University of Texas or University of California) | PhD Student      | I am a bioscience major (e.g., biology, ecology, integrated biology, biochemistry) | Quite a bit         | a classroom period | a professionally printed version of the game              | Solo (i.e., I was the only person responsible for my reef board)               | Quite a bit, I often play board games | Quite a bit, I often play online or digital games | I like both collaborative and competitive games                                |
| Public or State University (e.g., University of Texas or University of California) | PhD Student      | I am a bioscience major (e.g., biology, ecology, integrated biology, biochemistry) | Quite a bit         | a classroom period | a professionally printed version of the game              | Solo (i.e., I was the only person responsible for my reef board)               | I play board games every now and then | I play online or digital games every now and then | I like both collaborative and competitive games                                |
| Public or State University (e.g., University of Texas or University of California) | Master's student | I am a bioscience major (e.g., biology, ecology, integrated biology, biochemistry) | I knew a few things | a classroom period | a paper version of the game (i.e., printed on card stock) | Solo (i.e., I was the only person responsible for my reef board)               | I play board games every now and then | I rarely play online or digital games             | I prefer competitive games (i.e., more one-on-one or against others)           |

|                                                                                    |                                                      |                                                                                    |                     |                    |                                                           |                                                                                |                                       |                                                   |                                                                                |
|------------------------------------------------------------------------------------|------------------------------------------------------|------------------------------------------------------------------------------------|---------------------|--------------------|-----------------------------------------------------------|--------------------------------------------------------------------------------|---------------------------------------|---------------------------------------------------|--------------------------------------------------------------------------------|
| Public or State University (e.g., University of Texas or University of California) | PhD Student                                          | I am a bioscience major (e.g., biology, ecology, integrated biology, biochemistry) | Quite a bit         | a classroom period | Other                                                     | In a team of 3 or more (i.e., 3+ people worked together on one reef gameboard) | Quite a bit, I often play board games | Quite a bit, I often play online or digital games | I like both collaborative and competitive games                                |
| Public or State University (e.g., University of Texas or University of California) | Master's student                                     | I am a bioscience major (e.g., biology, ecology, integrated biology, biochemistry) | Quite a bit         | a classroom period | a professionally printed version of the game              | Solo (i.e., I was the only person responsible for my reef board)               | Quite a bit, I often play board games | A lot, I am an expert!                            | I like both collaborative and competitive games                                |
| Public or State University (e.g., University of Texas or University of California) | PhD Student                                          | Not applicable/Choose not to answer                                                | I knew a few things | a lab period       | a paper version of the game (i.e., printed on card stock) | Solo (i.e., I was the only person responsible for my reef board)               | I play board games every now and then | I rarely play online or digital games             | I prefer collaborative games (i.e., solving something together with teammates) |
| Public or State University (e.g., University of Texas or University of California) |                                                      |                                                                                    |                     |                    |                                                           |                                                                                |                                       |                                                   |                                                                                |
| I don't know                                                                       | PhD Student                                          | I am a bioscience major (e.g., biology, ecology, integrated biology, biochemistry) | Quite a bit         | a classroom period | Other                                                     | In a team of 3 or more (i.e., 3+ people worked together on one reef gameboard) | I play board games every now and then | I rarely play online or digital games             | I don't really know the difference                                             |
| Public or State University (e.g., University of Texas or University of California) | Junior (Third-year undergraduate student)            | I am a geoscience major (e.g., geology, geophysics, Earth sciences)                | Quite a bit         | a lab period       | a professionally printed version of the game              | Solo (i.e., I was the only person responsible for my reef board)               | A lot, I am an expert gamer           | A lot, I am an expert!                            | I like both collaborative and competitive games                                |
| Public or State University (e.g., University of Texas or University of California) | Senior (Fourth-year undergraduate student) or higher | I am a geoscience major (e.g., geology, geophysics, Earth sciences)                | I knew a few things | a lab period       | a professionally printed version of the game              | Solo (i.e., I was the only person responsible for my reef board)               | A lot, I am an expert gamer           | Quite a bit, I often play online or digital games | I prefer competitive games (i.e., more one-on-one or against others)           |

|                                                                                    |                                                      |                                                                                    |                                  |                    |                                                           |                                                                                |                                       |                                                   |                                                                                |
|------------------------------------------------------------------------------------|------------------------------------------------------|------------------------------------------------------------------------------------|----------------------------------|--------------------|-----------------------------------------------------------|--------------------------------------------------------------------------------|---------------------------------------|---------------------------------------------------|--------------------------------------------------------------------------------|
| Public or State University (e.g., University of Texas or University of California) | Senior (Fourth-year undergraduate student) or higher | I am a geoscience major (e.g., geology, geophysics, Earth sciences)                | Quite a bit                      | a lab period       | a professionally printed version of the game              | In a team of 3 or more (i.e., 3+ people worked together on one reef gameboard) | Quite a bit, I often play board games | Alot, I am an expert!                             | I prefer collaborative games (i.e., solving something together with teammates) |
| Public or State University (e.g., University of Texas or University of California) | Senior (Fourth-year undergraduate student) or higher | I am a geoscience major (e.g., geology, geophysics, Earth sciences)                | Quite a bit                      | a lab period       | a professionally printed version of the game              | Solo (i.e., I was the only person responsible for my reef board)               | I rarely play board games             | I rarely play online or digital games             | I prefer collaborative games (i.e., solving something together with teammates) |
| Public or State University (e.g., University of Texas or University of California) | Senior (Fourth-year undergraduate student) or higher | I am a geoscience major (e.g., geology, geophysics, Earth sciences)                | I knew a few things              | a lab period       | a professionally printed version of the game              | In a team of 3 or more (i.e., 3+ people worked together on one reef gameboard) | I rarely play board games             | Alot, I am an expert!                             | I prefer collaborative games (i.e., solving something together with teammates) |
| Public or State University (e.g., University of Texas or University of California) | Senior (Fourth-year undergraduate student) or higher | I am a geoscience major (e.g., geology, geophysics, Earth sciences)                | Quite a bit                      | a lab period       | a professionally printed version of the game              | In a team of 3 or more (i.e., 3+ people worked together on one reef gameboard) | Quite a bit, I often play board games | I play online or digital games every now and then | I prefer collaborative games (i.e., solving something together with teammates) |
| Public or State University (e.g., University of Texas or University of California) | Senior (Fourth-year undergraduate student) or higher | I am a geoscience major (e.g., geology, geophysics, Earth sciences)                | I knew a few things              | a lab period       | a professionally printed version of the game              | Solo (i.e., I was the only person responsible for my reef board)               | I play board games every now and then | I play online or digital games every now and then | I like both collaborative and competitive games                                |
| I don't know                                                                       | PhD Student                                          | I am a geoscience major (e.g., geology, geophysics, Earth sciences)                | I knew a few things              | Other              | a professionally printed version of the game              | Solo (i.e., I was the only person responsible for my reef board)               | I never play board games              | I rarely play online or digital games             | I dislike both collaborative and competitive games                             |
| Public or State University (e.g., University of Texas or University of California) | Senior (Fourth-year undergraduate student) or higher | I am a geoscience major (e.g., geology, geophysics, Earth sciences)                | I knew a few things, Quite a bit | a lab period       | a paper version of the game (i.e., printed on card stock) | In a team of 3 or more (i.e., 3+ people worked together on one reef gameboard) | I play board games every now and then | Quite a bit, I often play online or digital games | I prefer competitive games (i.e., more one-on-one or against others)           |
| Public or State University (e.g., University of Texas or University of California) | Senior (Fourth-year undergraduate student) or higher | I am a geoscience major (e.g., geology, geophysics, Earth sciences)                | Quite a bit                      | a lab period       | a professionally printed version of the game              | Solo (i.e., I was the only person responsible for my reef board)               | I play board games every now and then | Alot, I am an expert!                             | I prefer competitive games (i.e., more one-on-one or against others)           |
| Public or State University (e.g., University of Texas or University of California) | Senior (Fourth-year undergraduate student) or higher | I am a geoscience major (e.g., geology, geophysics, Earth sciences)                | I knew a few things              | a lab period       | a paper version of the game (i.e., printed on card stock) | Solo (i.e., I was the only person responsible for my reef board)               | Quite a bit, I often play board games | I rarely play online or digital games             | I prefer competitive games (i.e., more one-on-one or against others)           |
| Liberal Arts College (e.g., Williams College or Amherst College)                   | Freshman (First-year undergraduate student)          | I am a bioscience major (e.g., biology, ecology, integrated biology, biochemistry) | I knew a few things              | a classroom period | a professionally printed version of the game              | Solo (i.e., I was the only person responsible for my reef board)               | I play board games every now and then | Quite a bit, I often play online or digital games | I prefer competitive games (i.e., more one-on-one or against others)           |



[illegible]

|                                                                  |                                                      |                                                                                                         |                     |                    |                                              |                                                                                |                                       |                                                   |                                                                                |
|------------------------------------------------------------------|------------------------------------------------------|---------------------------------------------------------------------------------------------------------|---------------------|--------------------|----------------------------------------------|--------------------------------------------------------------------------------|---------------------------------------|---------------------------------------------------|--------------------------------------------------------------------------------|
| Liberal Arts College (e.g., Williams College or Amherst College) |                                                      |                                                                                                         |                     |                    |                                              |                                                                                |                                       |                                                   |                                                                                |
| Liberal Arts College (e.g., Williams College or Amherst College) |                                                      |                                                                                                         |                     |                    |                                              |                                                                                |                                       |                                                   |                                                                                |
| Liberal Arts College (e.g., Williams College or Amherst College) | Senior (Fourth-year undergraduate student) or higher | I am another STEM (Science, Technology, Engineering or Math) major (e.g. physics, chemical engineering) | Quite a bit         | a classroom period | a professionally printed version of the game | Solo (i.e., I was the only person responsible for my reef board)               | I play board games every now and then | Quite a bit, I often play online or digital games | I like both collaborative and competitive games                                |
| Liberal Arts College (e.g., Williams College or Amherst College) | Junior (Third-year undergraduate student)            | I am a geoscience major (e.g., geology, geophysics, Earth sciences)                                     | I knew a few things | a classroom period | a professionally printed version of the game | In a team of 3 or more (i.e., 3+ people worked together on one reef gameboard) | I play board games every now and then | I rarely play online or digital games             | I like both collaborative and competitive games                                |
| Liberal Arts College (e.g., Williams College or Amherst College) | Junior (Third-year undergraduate student)            | I am a geoscience major (e.g., geology, geophysics, Earth sciences)                                     | Quite a bit         | a classroom period | a professionally printed version of the game | In a team of 3 or more (i.e., 3+ people worked together on one reef gameboard) | I rarely play board games             | I play online or digital games every now and then | I prefer collaborative games (i.e., solving something together with teammates) |
| Liberal Arts College (e.g., Williams College or Amherst College) | Senior (Fourth-year undergraduate student) or higher | I am a geoscience major (e.g., geology, geophysics, Earth sciences)                                     | I knew a few things | a classroom period | a professionally printed version of the game | In a team of 3 or more (i.e., 3+ people worked together on one reef gameboard) | I play board games every now and then | I never play online or digital games              | I like both collaborative and competitive games                                |
| Private University (e.g., Harvard University, MIT, or CalTech)   | Senior (Fourth-year undergraduate student) or higher | I am a geoscience major (e.g., geology, geophysics, Earth sciences)                                     | I knew a few things | a classroom period | a professionally printed version of the game | In a team of 3 or more (i.e., 3+ people worked together on one reef gameboard) | I play board games every now and then | I rarely play online or digital games             | I like both collaborative and competitive games                                |

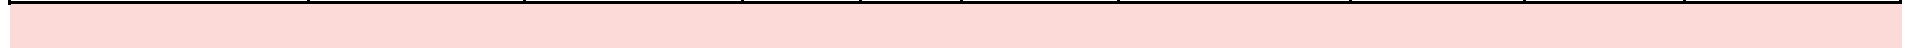

|                                                                                    |                                                      |                                                                                    |                     |              |                                                           |                                                                                |                                       |                                                   |                                                                                |
|------------------------------------------------------------------------------------|------------------------------------------------------|------------------------------------------------------------------------------------|---------------------|--------------|-----------------------------------------------------------|--------------------------------------------------------------------------------|---------------------------------------|---------------------------------------------------|--------------------------------------------------------------------------------|
| Liberal Arts College (e.g., Williams College or Amherst College)                   | Junior (Third-year undergraduate student)            | I am a geoscience major (e.g., geology, geophysics, Earth sciences)                | Quite a bit         | a lab period | a professionally printed version of the game              | Solo (i.e., I was the only person responsible for my reef board)               | Quite a bit, I often play board games | I rarely play online or digital games             | I like both collaborative and competitive games                                |
| Liberal Arts College (e.g., Williams College or Amherst College)                   | Sophomore (Second-year undergraduate student)        | I am a bioscience major (e.g., biology, ecology, integrated biology, biochemistry) | Quite a bit         | a lab period | a paper version of the game (i.e., printed on card stock) | In a team of 3 or more (i.e., 3+ people worked together on one reef gameboard) | I play board games every now and then | Quite a bit, I often play online or digital games | I like both collaborative and competitive games                                |
| Liberal Arts College (e.g., Williams College or Amherst College)                   | Senior (Fourth-year undergraduate student) or higher | I am a non STEM major (e.g., history, social work, art)                            | I knew very little  | a lab period | a professionally printed version of the game              | In a team of 3 or more (i.e., 3+ people worked together on one reef gameboard) | Quite a bit, I often play board games | Quite a bit, I often play online or digital games | I like both collaborative and competitive games                                |
| Liberal Arts College (e.g., Williams College or Amherst College)                   | Sophomore (Second-year undergraduate student)        | I am a geoscience major (e.g., geology, geophysics, Earth sciences)                | Quite a bit         | a lab period | a professionally printed version of the game              | Solo (i.e., I was the only person responsible for my reef board)               | I play board games every now and then | I play online or digital games every now and then | I prefer competitive games (i.e., more one-on-one or against others)           |
| Liberal Arts College (e.g., Williams College or Amherst College)                   | Senior (Fourth-year undergraduate student) or higher | I am a geoscience major (e.g., geology, geophysics, Earth sciences)                | I knew a few things | a lab period | a professionally printed version of the game              | In a team of 3 or more (i.e., 3+ people worked together on one reef gameboard) | Quite a bit, I often play board games | I play online or digital games every now and then | I prefer collaborative games (i.e., solving something together with teammates) |
| 4-year Community College                                                           | Senior (Fourth-year undergraduate student) or higher | I am a geoscience major (e.g., geology, geophysics, Earth sciences)                | Quite a bit         | a lab period | a professionally printed version of the game              | In a team of two (i.e., 2 people worked together on one reef gameboard)        | I never play board games              | I play online or digital games every now and then | I like both collaborative and competitive games                                |
| 4-year Community College                                                           | Senior (Fourth-year undergraduate student) or higher | I am a geoscience major (e.g., geology, geophysics, Earth sciences)                | I knew a few things | a lab period | a professionally printed version of the game              | In a team of 3 or more (i.e., 3+ people worked together on one reef gameboard) | I rarely play board games             | I never play online or digital games              | I don't really know the difference                                             |
| Public or State University (e.g., University of Texas or University of California) | Freshman (First-year undergraduate student)          | I am a geoscience major (e.g., geology, geophysics, Earth sciences)                | I knew a few things | a lab period | a professionally printed version of the game              | In a team of two (i.e., 2 people worked together on one reef gameboard)        | I rarely play board games             | I rarely play online or digital games             | I like both collaborative and competitive games                                |
| Public or State University (e.g., University of Texas or University of California) | Junior (Third-year undergraduate student)            | I am a geoscience major (e.g., geology, geophysics, Earth sciences)                | I knew a few things | a lab period | a professionally printed version of the game              | In a team of two (i.e., 2 people worked together on one reef gameboard)        | Quite a bit, I often play board games | I play online or digital games every now and then | I like both collaborative and competitive games                                |

|                                                                                    |                                                      |                                                                                                         |                       |              |                                                           |                                                                                |                                       |                                                   |                                                                                |
|------------------------------------------------------------------------------------|------------------------------------------------------|---------------------------------------------------------------------------------------------------------|-----------------------|--------------|-----------------------------------------------------------|--------------------------------------------------------------------------------|---------------------------------------|---------------------------------------------------|--------------------------------------------------------------------------------|
| 4-year Community College                                                           | Junior (Third-year undergraduate student)            | I am a geoscience major (e.g., geology, geophysics, Earth sciences)                                     | I knew a few things   | a lab period | a paper version of the game (i.e., printed on card stock) | In a team of two (i.e., 2 people worked together on one reef gameboard)        | I rarely play board games             | I play online or digital games every now and then | I like both collaborative and competitive games                                |
| Public or State University (e.g., University of Texas or University of California) | Junior (Third-year undergraduate student)            | I am a geoscience major (e.g., geology, geophysics, Earth sciences)                                     | I knew a few things   | a lab period | a professionally printed version of the game              | In a team of 3 or more (i.e., 3+ people worked together on one reef gameboard) | I play board games every now and then | Quite a bit, I often play online or digital games | I like both collaborative and competitive games                                |
| Private University (e.g., Harvard University, MIT, or CalTech)                     | Junior (Third-year undergraduate student)            | I am another STEM (Science, Technology, Engineering or Math) major (e.g. physics, chemical engineering) | I knew a few things   | Other        | a professionally printed version of the game              | In a team of 3 or more (i.e., 3+ people worked together on one reef gameboard) | A lot, I am an expert gamer           | A lot, I am an expert!                            | I prefer competitive games (i.e., more one-on-one or against others)           |
| Liberal Arts College (e.g., Williams College or Amherst College)                   | Senior (Fourth-year undergraduate student) or higher | I am a bioscience major (e.g., biology, ecology, integrated biology, biochemistry)                      | A lot, I am an expert | Other        | a professionally printed version of the game              | Solo (i.e., I was the only person responsible for my reef board)               | I play board games every now and then | Quite a bit, I often play online or digital games | I prefer competitive games (i.e., more one-on-one or against others)           |
| Private University (e.g., Harvard University, MIT, or CalTech)                     | Sophomore (Second-year undergraduate student)        | I am a bioscience major (e.g., biology, ecology, integrated biology, biochemistry)                      | Quite a bit           | Other        | a professionally printed version of the game              | In a team of 3 or more (i.e., 3+ people worked together on one reef gameboard) | I play board games every now and then | I rarely play online or digital games             | I prefer collaborative games (i.e., solving something together with teammates) |
| Liberal Arts College (e.g., Williams College or Amherst College)                   | Junior (Third-year undergraduate student)            | I am a bioscience major (e.g., biology, ecology, integrated biology, biochemistry)                      | Quite a bit           | Other        | a paper version of the game (i.e., printed on card stock) | Solo (i.e., I was the only person responsible for my reef board)               | Quite a bit, I often play board games | Quite a bit, I often play online or digital games | I like both collaborative and competitive games                                |
| Private University (e.g., Harvard University, MIT, or CalTech)                     | Senior (Fourth-year undergraduate student) or higher | I am a bioscience major (e.g., biology, ecology, integrated biology, biochemistry)                      | A lot, I am an expert | Other        | a professionally printed version of the game              | In a team of 3 or more (i.e., 3+ people worked together on one reef gameboard) | Quite a bit, I often play board games | I play online or digital games every now and then | I like both collaborative and competitive games                                |
| Liberal Arts College (e.g., Williams College or Amherst College)                   | Senior (Fourth-year undergraduate student) or higher | I am a bioscience major (e.g., biology, ecology, integrated biology, biochemistry)                      | Quite a bit           | Other        | a professionally printed version of the game              | In a team of 3 or more (i.e., 3+ people worked together on one reef gameboard) | A lot, I am an expert gamer           | Quite a bit, I often play online or digital games | I like both collaborative and competitive games                                |
| Private University (e.g., Harvard University, MIT, or CalTech)                     | Junior (Third-year undergraduate student)            | I am a bioscience major (e.g., biology, ecology, integrated biology, biochemistry)                      | A lot, I am an expert | Other        | a professionally printed version of the game              | Solo (i.e., I was the only person responsible for my reef board)               | Quite a bit, I often play board games | I rarely play online or digital games             | I prefer competitive games (i.e., more one-on-one or against others)           |
| Private University (e.g., Harvard University, MIT, or CalTech)                     | Junior (Third-year undergraduate student)            | I am a bioscience major (e.g., biology, ecology, integrated biology, biochemistry)                      | Quite a bit           | Other        | a paper version of the game (i.e., printed on card stock) | In a team of 3 or more (i.e., 3+ people worked together on one reef gameboard) | I play board games every now and then | A lot, I am an expert!                            | I like both collaborative and competitive games                                |
| Private University (e.g., Harvard University, MIT, or CalTech)                     | Junior (Third-year undergraduate student)            | I am a bioscience major (e.g., biology, ecology, integrated biology, biochemistry)                      | A lot, I am an expert | Other        | a paper version of the game (i.e., printed on card stock) | Solo (i.e., I was the only person responsible for my reef board)               | Quite a bit, I often play board games | I play online or digital games every now and then | I like both collaborative and competitive games                                |
| Private University (e.g., Harvard University, MIT, or CalTech)                     | Junior (Third-year undergraduate student)            | I am a bioscience major (e.g., biology, ecology, integrated biology, biochemistry)                      | Quite a bit           | Other        | a professionally printed version of the game              | Solo (i.e., I was the only person responsible for my reef board)               | Quite a bit, I often play board games | I play online or digital games every now and then | I like both collaborative and competitive games                                |

[illegible]

|                                                                                    |                                                      |                                                                                                    |                     |                    |                                              |                                                                                |                                       |                                                   |                                                                                |
|------------------------------------------------------------------------------------|------------------------------------------------------|----------------------------------------------------------------------------------------------------|---------------------|--------------------|----------------------------------------------|--------------------------------------------------------------------------------|---------------------------------------|---------------------------------------------------|--------------------------------------------------------------------------------|
| Public or State University (e.g., University of Texas or University of California) | Senior (Fourth-year undergraduate student) or higher | I am a geoscience major (e.g., geology, geophysics, Earth sciences)                                | Quite a bit         | a lab period       | a professionally printed version of the game | In a team of 3 or more (i.e., 3+ people worked together on one reef gameboard) | Alot, I am an expert gamer            | Quite a bit, I often play online or digital games | I like both collaborative and competitive games                                |
| Public or State University (e.g., University of Texas or University of California) | Senior (Fourth-year undergraduate student) or higher | I am a geoscience major (e.g., geology, geophysics, Earth sciences)                                | Quite a bit         | a lab period       | a professionally printed version of the game | Solo (i.e., I was the only person responsible for my reef board)               | Quite a bit, I often play board games | Quite a bit, I often play online or digital games | I like both collaborative and competitive games                                |
| Public or State University (e.g., University of Texas or University of California) | Senior (Fourth-year undergraduate student) or higher | I am a geoscience major (e.g., geology, geophysics, Earth sciences)                                | Quite a bit         | Other              | a professionally printed version of the game | Solo (i.e., I was the only person responsible for my reef board)               | Quite a bit, I often play board games | Quite a bit, I often play online or digital games | I like both collaborative and competitive games                                |
| Public or State University (e.g., University of Texas or University of California) | Senior (Fourth-year undergraduate student) or higher | I am a geoscience major (e.g., geology, geophysics, Earth sciences)                                | Quite a bit         | a lab period       | a professionally printed version of the game | Solo (i.e., I was the only person responsible for my reef board)               | Quite a bit, I often play board games | I play online or digital games every now and then | I like both collaborative and competitive games                                |
| Public or State University (e.g., University of Texas or University of California) | Junior (Third-year undergraduate student)            | I am a geoscience major (e.g., geology, geophysics, Earth sciences)                                | Quite a bit         | a lab period       | a professionally printed version of the game | Solo (i.e., I was the only person responsible for my reef board)               | Quite a bit, I often play board games | Quite a bit, I often play online or digital games | I like both collaborative and competitive games                                |
| Public or State University (e.g., University of Texas or University of California) | Senior (Fourth-year undergraduate student) or higher | I am a geoscience major (e.g., geology, geophysics, Earth sciences)                                | Quite a bit         | a classroom period | a professionally printed version of the game | Solo (i.e., I was the only person responsible for my reef board)               | Quite a bit, I often play board games | Quite a bit, I often play online or digital games | I prefer competitive games (i.e., more one-on-one or against others)           |
| Public or State University (e.g., University of Texas or University of California) | Senior (Fourth-year undergraduate student) or higher | I am a geoscience major (e.g., geology, geophysics, Earth sciences)                                | I knew a few things | a classroom period | a professionally printed version of the game | In a team of 3 or more (i.e., 3+ people worked together on one reef gameboard) | I play board games every now and then | Quite a bit, I often play online or digital games | I like both collaborative and competitive games                                |
| Public or State University (e.g., University of Texas or University of California) | Non traditional Undergraduate Student                | I am a geoscience major (e.g., geology, geophysics, Earth sciences)                                | Quite a bit         | a lab period       | a professionally printed version of the game | In a team of 3 or more (i.e., 3+ people worked together on one reef gameboard) | Alot, I am an expert gamer            | I play online or digital games every now and then | I prefer collaborative games (i.e., solving something together with teammates) |
| Public or State University (e.g., University of Texas or University of California) | Junior (Third-year undergraduate student)            | I am a geoscience major (e.g., geology, geophysics, Earth sciences)                                | Quite a bit         | a lab period       | a professionally printed version of the game | Solo (i.e., I was the only person responsible for my reef board)               | Quite a bit, I often play board games | Quite a bit, I often play online or digital games | I like both collaborative and competitive games                                |
| I don't know                                                                       | Sophomore (Second-year undergraduate student)        | I am a bioscience major (e.g., biology, ecology, integrated biology, biochemistry)                 | Quite a bit         | a lab period       | a professionally printed version of the game | In a team of two (i.e., 2 people worked together on one reef gameboard)        | I play board games every now and then | I play online or digital games every now and then | I prefer competitive games (i.e., more one-on-one or against others)           |
| Public or State University (e.g., University of Texas or University of California) | I'm a Senior +                                       | I am a STEM (Science, Technology, Engineering or Math) major (e.g., biology, chemical engineering) | I knew very little  | a lab period       | a professionally printed version of the game | Solo (i.e., I was the only person responsible for my reef board)               | I play board games every now and then | I play online or digital games every now and then | I prefer competitive games (i.e., more one-on-one or against others)           |
| Public or State University (e.g., University of Texas or University of California) | I'm a Junior                                         | I am a geoscience major (e.g., geology, geophysics, Earth sciences)                                | I knew a few things | a lab period       | a professionally printed version of the game | In a team of two (i.e., 2 people worked together on one reef gameboard)        | Quite a bit, I often play board games | I rarely play online or digital games             | I like both collaborative and competitive games                                |

|                                                                                    |                 |                                                                                                    |                                                    |              |                                              |                                                                         |                                                                   |                                                   |                                                                                                                       |
|------------------------------------------------------------------------------------|-----------------|----------------------------------------------------------------------------------------------------|----------------------------------------------------|--------------|----------------------------------------------|-------------------------------------------------------------------------|-------------------------------------------------------------------|---------------------------------------------------|-----------------------------------------------------------------------------------------------------------------------|
| Public or State University (e.g., University of Texas or University of California) | I'm a Junior    | I am a geoscience major (e.g., geology, geophysics, Earth sciences)                                | Alot, I am an expert                               | a lab period | a professionally printed version of the game | In a team of two (i.e., 2 people worked together on one reef gameboard) | Alot, I am an expert gamer                                        | Alot, I am an expert!                             | I like both collaborative and competitive games                                                                       |
| Public or State University (e.g., University of Texas or University of California) | I'm a Sophomore | I am a STEM (Science, Technology, Engineering or Math) major (e.g., biology, chemical engineering) | I knew very little                                 | a lab period | a professionally printed version of the game | Solo (i.e., I was the only person responsible for my reef board)        | Quite a bit, I often play board games                             | I play online or digital games every now and then | I prefer competitive games (i.e., more one-on-one or against others)                                                  |
| Public or State University (e.g., University of Texas or University of California) | I'm a Sophomore | I am a geoscience major (e.g., geology, geophysics, Earth sciences)                                | I knew a few things                                | a lab period | a professionally printed version of the game | Solo (i.e., I was the only person responsible for my reef board)        | Quite a bit, I often play board games                             | I rarely play online or digital games             | I prefer competitive games (i.e., more one-on-one or against others)                                                  |
| Public or State University (e.g., University of Texas or University of California) | I'm a Senior +  | I am a geoscience major (e.g., geology, geophysics, Earth sciences)                                | I knew very little, I didn't know any paleontology | a lab period | a professionally printed version of the game | Solo (i.e., I was the only person responsible for my reef board)        | Alot, I am an expert gamer, Quite a bit, I often play board games | I play online or digital games every now and then | I prefer collaborative games (i.e., solving something together with teammates)                                        |
| Public or State University (e.g., University of Texas or University of California) | I'm a Sophomore | I am a geoscience major (e.g., geology, geophysics, Earth sciences)                                | I knew very little                                 | a lab period | a professionally printed version of the game | In a team of two (i.e., 2 people worked together on one reef gameboard) | I play board games every now and then                             | Alot, I am an expert!                             | I prefer competitive games (i.e., more one-on-one or against others), I like both collaborative and competitive games |
| Public or State University (e.g., University of Texas or University of California) | I'm a Freshman  | I am a geoscience major (e.g., geology, geophysics, Earth sciences)                                | I knew very little                                 | a lab period | a professionally printed version of the game | Solo (i.e., I was the only person responsible for my reef board)        | Quite a bit, I often play board games                             | Quite a bit, I often play online or digital games | I like both collaborative and competitive games                                                                       |
| Public or State University (e.g., University of Texas or University of California) | I'm a Freshman  | I am a geoscience major (e.g., geology, geophysics, Earth sciences)                                | I knew a few things                                | a lab period | a professionally printed version of the game | In a team of two (i.e., 2 people worked together on one reef gameboard) | I play board games every now and then                             | I never play online or digital games              | I like both collaborative and competitive games                                                                       |
| Public or State University (e.g., University of Texas or University of California) | I'm a Sophomore | I am a geoscience major (e.g., geology, geophysics, Earth sciences)                                | I knew very little                                 | a lab period | a professionally printed version of the game | In a team of two (i.e., 2 people worked together on one reef gameboard) | I rarely play board games                                         | I play online or digital games every now and then | I prefer competitive games (i.e., more one-on-one or against others)                                                  |
| Public or State University (e.g., University of Texas or University of California) | I'm a Freshman  | I am a non STEM major (e.g., history, social work, art)                                            | I knew very little                                 | a lab period | a professionally printed version of the game | Solo (i.e., I was the only person responsible for my reef board)        | Alot, I am an expert gamer                                        | Alot, I am an expert!                             | I prefer competitive games (i.e., more one-on-one or against others)                                                  |
| Public or State University (e.g., University of Texas or University of California) | I'm a Sophomore | I am a geoscience major (e.g., geology, geophysics, Earth sciences)                                | I knew a few things                                | a lab period | a professionally printed version of the game | In a team of two (i.e., 2 people worked together on one reef gameboard) | I play board games every now and then                             | I rarely play online or digital games             | I prefer collaborative games (i.e., solving something together with teammates)                                        |
| Public or State University (e.g., University of Texas or University of California) | I'm a Freshman  | I am a geoscience major (e.g., geology, geophysics, Earth sciences)                                | I knew a few things                                | a lab period | a professionally printed version of the game | Solo (i.e., I was the only person responsible for my reef board)        | Quite a bit, I often play board games                             | Alot, I am an expert!                             | I like both collaborative and competitive games                                                                       |
| Public or State University (e.g., University of Texas or University of California) | I'm a Freshman  | I am a geoscience major (e.g., geology, geophysics, Earth sciences)                                | I knew very little                                 | a lab period | a professionally printed version of the game | Solo (i.e., I was the only person responsible for my reef board)        | Quite a bit, I often play board games                             | Quite a bit, I often play online or digital games | I like both collaborative and competitive games                                                                       |
| Public or State University (e.g., University of Texas or University of California) | No Response     | No Response                                                                                        | I knew a few things                                | a lab period | a professionally printed version of the game | Solo (i.e., I was the only person responsible for my reef board)        | Quite a bit, I often play board games                             | I play online or digital games every now and then | I like both collaborative and competitive games                                                                       |

|                                                                                    |                 |                                                                                                    |                                |              |                                              |                                                                         |                                                                  |                                                                                          |                                                                                |
|------------------------------------------------------------------------------------|-----------------|----------------------------------------------------------------------------------------------------|--------------------------------|--------------|----------------------------------------------|-------------------------------------------------------------------------|------------------------------------------------------------------|------------------------------------------------------------------------------------------|--------------------------------------------------------------------------------|
| Public or State University (e.g., University of Texas or University of California) | I'm a Junior    | I am a geoscience major (e.g., geology, geophysics, Earth sciences)                                | I knew a few things            | a lab period | a professionally printed version of the game | In a team of two (i.e., 2 people worked together on one reef gameboard) | I play board games every now and then                            | Alot, I am an expert!                                                                    | I prefer collaborative games (i.e., solving something together with teammates) |
| Public or State University (e.g., University of Texas or University of California) | I'm a Freshman  | I am a geoscience major (e.g., geology, geophysics, Earth sciences)                                | Quite a bit                    | a lab period | a professionally printed version of the game | Solo (i.e., I was the only person responsible for my reef board)        | I play board games every now and then                            | Quite a bit, I often play online or digital games                                        | I prefer collaborative games (i.e., solving something together with teammates) |
| Public or State University (e.g., University of Texas or University of California) | I'm a Freshman  | I am a geoscience major (e.g., geology, geophysics, Earth sciences)                                | I didn't know any paleontology | a lab period | a professionally printed version of the game | Solo (i.e., I was the only person responsible for my reef board)        | I never play board games                                         | I play online or digital games every now and then                                        | I like both collaborative and competitive games                                |
| Public or State University (e.g., University of Texas or University of California) | I'm a Sophomore | I am undeclared                                                                                    | I knew a few things            | a lab period | a professionally printed version of the game | Solo (i.e., I was the only person responsible for my reef board)        | I play board games every now and then                            | Alot, I am an expert!                                                                    | I prefer competitive games (i.e., more one-on-one or against others)           |
| Public or State University (e.g., University of Texas or University of California) | I'm a Freshman  | I am a geoscience major (e.g., geology, geophysics, Earth sciences)                                | I knew very little             | a lab period | a professionally printed version of the game | Solo (i.e., I was the only person responsible for my reef board)        | I play board games every now and then                            | Quite a bit, I often play online or digital games                                        | I prefer competitive games (i.e., more one-on-one or against others)           |
| Public or State University (e.g., University of Texas or University of California) | I'm a Freshman  | I am a geoscience major (e.g., geology, geophysics, Earth sciences)                                | I knew very little             | a lab period | a professionally printed version of the game | In a team of two (i.e., 2 people worked together on one reef gameboard) | Quite a bit, I often play board games                            | I rarely play online or digital games                                                    | I prefer collaborative games (i.e., solving something together with teammates) |
| Public or State University (e.g., University of Texas or University of California) | I'm a Senior +  | I am a STEM (Science, Technology, Engineering or Math) major (e.g., biology, chemical engineering) | I didn't know any paleontology | a lab period | a professionally printed version of the game | In a team of two (i.e., 2 people worked together on one reef gameboard) | I play board games every now and then                            | Quite a bit, I often play online or digital games                                        | I prefer collaborative games (i.e., solving something together with teammates) |
| Public or State University (e.g., University of Texas or University of California) | I'm a Freshman  | I am a geoscience major (e.g., geology, geophysics, Earth sciences)                                | I knew very little             | a lab period | a professionally printed version of the game | Solo (i.e., I was the only person responsible for my reef board)        | I play board games every now and then, I rarely play board games | I play online or digital games every now and then, I rarely play online or digital games | I like both collaborative and competitive games                                |
| Public or State University (e.g., University of Texas or University of California) | I'm a Junior    | I am a geoscience major (e.g., geology, geophysics, Earth sciences)                                | I knew a few things            | a lab period | a professionally printed version of the game | In a team of two (i.e., 2 people worked together on one reef gameboard) | Alot, I am an expert gamer                                       | I never play online or digital games                                                     | I prefer collaborative games (i.e., solving something together with teammates) |
| Public or State University (e.g., University of Texas or University of California) | I'm a Senior +  | I am a STEM (Science, Technology, Engineering or Math) major (e.g., biology, chemical engineering) | I didn't know any paleontology | a lab period | a professionally printed version of the game | In a team of two (i.e., 2 people worked together on one reef gameboard) | Quite a bit, I often play board games                            | Alot, I am an expert!                                                                    | I like both collaborative and competitive games                                |
| Public or State University (e.g., University of Texas or University of California) | I'm a Sophomore | I am a STEM (Science, Technology, Engineering or Math) major (e.g., biology, chemical engineering) | I knew very little             | a lab period | a professionally printed version of the game | Solo (i.e., I was the only person responsible for my reef board)        | Quite a bit, I often play board games                            | Quite a bit, I often play online or digital games                                        | I prefer collaborative games (i.e., solving something together with teammates) |

|                                                                                    |                 |                                                                                                    |                                |              |                                              |                                                                         |                                       |                                                   |                                                                                 |
|------------------------------------------------------------------------------------|-----------------|----------------------------------------------------------------------------------------------------|--------------------------------|--------------|----------------------------------------------|-------------------------------------------------------------------------|---------------------------------------|---------------------------------------------------|---------------------------------------------------------------------------------|
| Public or State University (e.g., University of Texas or University of California) | I'm a Freshman  | I am a geoscience major (e.g., geology, geophysics, Earth sciences)                                | I knew a few things            | a lab period | a professionally printed version of the game | In a team of two (i.e., 2 people worked together on one reef gameboard) | Alot, I am an expert gamer            | Alot, I am an expert!                             | I like both collaborative and competitive games                                 |
| Public or State University (e.g., University of Texas or University of California) | I'm a Sophomore | I am a geoscience major (e.g., geology, geophysics, Earth sciences)                                | I knew very little             | a lab period | a professionally printed version of the game | Solo (i.e., I was the only person responsible for my reef board)        | I play board games every now and then | I play online or digital games every now and then | I prefer collaborative games (i.e., solving something together with team mates) |
| Public or State University (e.g., University of Texas or University of California) | No Response     | No Response                                                                                        | I knew a few things            | a lab period | a professionally printed version of the game | Solo (i.e., I was the only person responsible for my reef board)        | Quite a bit, I often play board games | Quite a bit, I often play online or digital games | I like both collaborative and competitive games                                 |
| Public or State University (e.g., University of Texas or University of California) | I'm a Junior    | I am a STEM (Science, Technology, Engineering or Math) major (e.g., biology, chemical engineering) | I didn't know any paleontology | a lab period | a professionally printed version of the game | In a team of two (i.e., 2 people worked together on one reef gameboard) | I play board games every now and then | I play online or digital games every now and then | I prefer collaborative games (i.e., solving something together with team mates) |
| Public or State University (e.g., University of Texas or University of California) | I'm a Sophomore | I am a geoscience major (e.g., geology, geophysics, Earth sciences)                                | I knew a few things            | a lab period | a professionally printed version of the game | In a team of two (i.e., 2 people worked together on one reef gameboard) | Quite a bit, I often play board games | I play online or digital games every now and then | I like both collaborative and competitive games                                 |
| Public or State University (e.g., University of Texas or University of California) | No Response     | No Response                                                                                        | I knew very little             | a lab period | a professionally printed version of the game | Solo (i.e., I was the only person responsible for my reef board)        | I play board games every now and then | I rarely play online or digital games             | I like both collaborative and competitive games                                 |
| Public or State University (e.g., University of Texas or University of California) | I'm a Sophomore | I am a STEM (Science, Technology, Engineering or Math) major (e.g., biology, chemical engineering) | I knew a few things            | a lab period | a professionally printed version of the game | Solo (i.e., I was the only person responsible for my reef board)        | I rarely play board games             | Quite a bit, I often play online or digital games | I prefer competitive games (i.e., more one-on-one or against others)            |
| Public or State University (e.g., University of Texas or University of California) | I'm a Freshman  | I am a geoscience major (e.g., geology, geophysics, Earth sciences)                                | I knew very little             | a lab period | a professionally printed version of the game | In a team of two (i.e., 2 people worked together on one reef gameboard) | I play board games every now and then | I play online or digital games every now and then | I prefer collaborative games (i.e., solving something together with team mates) |
| Public or State University (e.g., University of Texas or University of California) | I'm a Freshman  | I am a geoscience major (e.g., geology, geophysics, Earth sciences)                                | I knew a few things            | a lab period | a professionally printed version of the game | In a team of two (i.e., 2 people worked together on one reef gameboard) | I play board games every now and then | Quite a bit, I often play online or digital games | I like both collaborative and competitive games                                 |
| Public or State University (e.g., University of Texas or University of California) | I'm a Freshman  | I am a geoscience major (e.g., geology, geophysics, Earth sciences)                                | I knew very little             | a lab period | a professionally printed version of the game | In a team of two (i.e., 2 people worked together on one reef gameboard) | I play board games every now and then | Quite a bit, I often play online or digital games | I prefer competitive games (i.e., more one-on-one or against others)            |
| Public or State University (e.g., University of Texas or University of California) | I'm a Freshman  | I am a geoscience major (e.g., geology, geophysics, Earth sciences)                                | Quite a bit                    | a lab period | a professionally printed version of the game | In a team of two (i.e., 2 people worked together on one reef gameboard) | I rarely play board games             | Quite a bit, I often play online or digital games | I like both collaborative and competitive games                                 |
| Public or State University (e.g., University of Texas or University of California) | I'm a Freshman  | I am a geoscience major (e.g., geology, geophysics, Earth sciences)                                | I knew a few things            | a lab period | a professionally printed version of the game | Solo (i.e., I was the only person responsible for my reef board)        | Quite a bit, I often play board games | I play online or digital games every now and then | I prefer collaborative games (i.e., solving something together with team mates) |



|                                                                                    |                 |                                                                                                    |                                         |              |                                              |                                                                         |                                                                  |                                                                                                      |                                                                      |
|------------------------------------------------------------------------------------|-----------------|----------------------------------------------------------------------------------------------------|-----------------------------------------|--------------|----------------------------------------------|-------------------------------------------------------------------------|------------------------------------------------------------------|------------------------------------------------------------------------------------------------------|----------------------------------------------------------------------|
| Public or State University (e.g., University of Texas or University of California) | No Response     | No Response                                                                                        | I didn't know any paleontology          | a lab period | a professionally printed version of the game | In a team of two (i.e., 2 people worked together on one reef gameboard) | I play board games every now and then                            | Quite a bit, I often play online or digital games                                                    | I like both collaborative and competitive games                      |
| Public or State University (e.g., University of Texas or University of California) | I'm a Freshman  | I am a non STEM major (e.g., history, social work, art)                                            | I knew very little                      | a lab period | a professionally printed version of the game | In a team of two (i.e., 2 people worked together on one reef gameboard) | I play board games every now and then, I rarely play board games | Quite a bit, I often play online or digital games                                                    | I like both collaborative and competitive games                      |
| Public or State University (e.g., University of Texas or University of California) | I'm a Sophomore | I am a STEM (Science, Technology, Engineering or Math) major (e.g., biology, chemical engineering) | I knew a few things                     | a lab period | a professionally printed version of the game | In a team of two (i.e., 2 people worked together on one reef gameboard) | I play board games every now and then                            | Quite a bit, I often play online or digital games                                                    | I like both collaborative and competitive games                      |
| Public or State University (e.g., University of Texas or University of California) | I'm a Freshman  | I am a geoscience major (e.g., geology, geophysics, Earth sciences)                                | I knew a few things                     | a lab period | a professionally printed version of the game | In a team of two (i.e., 2 people worked together on one reef gameboard) | Alot, I am an expert gamer                                       | Quite a bit, I often play online or digital games, I play online or digital games every now and then | I like both collaborative and competitive games                      |
| Public or State University (e.g., University of Texas or University of California) | I'm a Freshman  | I am a STEM (Science, Technology, Engineering or Math) major (e.g., biology, chemical engineering) | I knew a few things                     | a lab period | a professionally printed version of the game | In a team of two (i.e., 2 people worked together on one reef gameboard) | I play board games every now and then                            | Quite a bit, I often play online or digital games                                                    | I like both collaborative and competitive games                      |
| Public or State University (e.g., University of Texas or University of California) | I'm a Freshman  | I am a geoscience major (e.g., geology, geophysics, Earth sciences)                                | I knew a few things, I knew very little | a lab period | a professionally printed version of the game | Solo (i.e., I was the only person responsible for my reef board)        | I play board games every now and then, I rarely play board games | Alot, I am an expert! Quite a bit, I often play online or digital games                              | I like both collaborative and competitive games                      |
| Public or State University (e.g., University of Texas or University of California) | I'm a Freshman  | I am a geoscience major (e.g., geology, geophysics, Earth sciences)                                | I knew very little                      | a lab period | a professionally printed version of the game | In a team of two (i.e., 2 people worked together on one reef gameboard) | Alot, I am an expert gamer                                       | Alot, I am an expert!                                                                                | I like both collaborative and competitive games                      |
| Public or State University (e.g., University of Texas or University of California) | I'm a Freshman  | I am a geoscience major (e.g., geology, geophysics, Earth sciences)                                | Quite a bit                             | a lab period | a professionally printed version of the game | Solo (i.e., I was the only person responsible for my reef board)        | Quite a bit, I often play board games                            | Alot, I am an expert!                                                                                | I like both collaborative and competitive games                      |
| Public or State University (e.g., University of Texas or University of California) | I'm a Freshman  | I am a geoscience major (e.g., geology, geophysics, Earth sciences)                                | I knew a few things                     | a lab period | a professionally printed version of the game | Solo (i.e., I was the only person responsible for my reef board)        | I play board games every now and then                            | I rarely play online or digital games                                                                | I prefer competitive games (i.e., more one-on-one or against others) |
| Public or State University (e.g., University of Texas or University of California) | I'm a Sophomore | I am a STEM (Science, Technology, Engineering or Math) major (e.g., biology, chemical engineering) | I knew a few things, I knew very little | a lab period | a professionally printed version of the game | In a team of two (i.e., 2 people worked together on one reef gameboard) | Alot, I am an expert gamer                                       | I play online or digital games every now and then                                                    | I like both collaborative and competitive games                      |
| Public or State University (e.g., University of Texas or University of California) | I'm a Sophomore | I am a non STEM major (e.g., history, social work, art)                                            | I didn't know any paleontology          | a lab period | a professionally printed version of the game | Solo (i.e., I was the only person responsible for my reef board)        | I play board games every now and then                            | Quite a bit, I often play online or digital games                                                    | I like both collaborative and competitive games                      |
| Public or State University (e.g., University of Texas or University of California) | I'm a Sophomore | I am a geoscience major (e.g., geology, geophysics, Earth sciences)                                | I knew a few things                     | a lab period | a professionally printed version of the game | Solo (i.e., I was the only person responsible for my reef board)        | I rarely play board games                                        | I rarely play online or digital games                                                                | I dislike both collaborative and competitive games                   |

|                                                                                    |                |                                                                                                    |                                  |              |                                              |                                                                         |                                       |                                                   |                                                                      |
|------------------------------------------------------------------------------------|----------------|----------------------------------------------------------------------------------------------------|----------------------------------|--------------|----------------------------------------------|-------------------------------------------------------------------------|---------------------------------------|---------------------------------------------------|----------------------------------------------------------------------|
| Public or State University (e.g., University of Texas or University of California) | I'm a Freshman | I am a geoscience major (e.g., geology, geophysics, Earth sciences)                                | I knew a few things              | a lab period | a professionally printed version of the game | In a team of two (i.e., 2 people worked together on one reef gameboard) | I play board games every now and then | Alot, I am an expert!                             | I like both collaborative and competitive games                      |
|                                                                                    |                | I am a geoscience major (e.g., geology, geophysics, Earth sciences)                                | I didn't know any paleontology   | a lab period | a professionally printed version of the game | Solo (i.e., I was the only person responsible for my reef board)        | Quite a bit, I often play board games | I play online or digital games every now and then | I like both collaborative and competitive games                      |
| Public or State University (e.g., University of Texas or University of California) | I'm a Junior   | I am a geoscience major (e.g., geology, geophysics, Earth sciences)                                | I knew a few things              | a lab period | a professionally printed version of the game | Solo (i.e., I was the only person responsible for my reef board)        | I play board games every now and then | I play online or digital games every now and then | I like both collaborative and competitive games                      |
|                                                                                    |                | I am a STEM (Science, Technology, Engineering or Math) major (e.g., biology, chemical engineering) | I knew a few things              | a lab period | a professionally printed version of the game | In a team of two (i.e., 2 people worked together on one reef gameboard) | I play board games every now and then | Quite a bit, I often play online or digital games | I prefer competitive games (i.e., more one-on-one or against others) |
| Public or State University (e.g., University of Texas or University of California) | I'm a Freshman | I am a STEM (Science, Technology, Engineering or Math) major (e.g., biology, chemical engineering) | I knew very little               | a lab period | a professionally printed version of the game | Solo (i.e., I was the only person responsible for my reef board)        | I play board games every now and then | I play online or digital games every now and then | I prefer competitive games (i.e., more one-on-one or against others) |
|                                                                                    |                | I am a geoscience major (e.g., geology, geophysics, Earth sciences)                                | I knew very little               | a lab period | a professionally printed version of the game | In a team of two (i.e., 2 people worked together on one reef gameboard) | I rarely play board games             | Quite a bit, I often play online or digital games | I like both collaborative and competitive games                      |
| Public or State University (e.g., University of Texas or University of California) | I'm a Freshman | I am a nonSTEM major (e.g., history, social work, art)                                             | Quite a bit, I knew a few things | a lab period | a professionally printed version of the game | In a team of two (i.e., 2 people worked together on one reef gameboard) | I play board games every now and then | Alot, I am an expert!                             | I dislike both collaborative and competitive games                   |
|                                                                                    |                | I am a geoscience major (e.g., geology, geophysics, Earth sciences)                                | Quite a bit                      | a lab period | a professionally printed version of the game | In a team of two (i.e., 2 people worked together on one reef gameboard) | Quite a bit, I often play board games | Quite a bit, I often play online or digital games | I prefer competitive games (i.e., more one-on-one or against others) |

|                                                                                    |                 |                                                                                                    |                     |              |                                              |                                                                         |                                       |                                                                         |                                                                                                                      |
|------------------------------------------------------------------------------------|-----------------|----------------------------------------------------------------------------------------------------|---------------------|--------------|----------------------------------------------|-------------------------------------------------------------------------|---------------------------------------|-------------------------------------------------------------------------|----------------------------------------------------------------------------------------------------------------------|
| Public or State University (e.g., University of Texas or University of California) |                 | I am a STEM (Science, Technology, Engineering or Math) major (e.g., biology, chemical engineering) |                     |              |                                              |                                                                         |                                       |                                                                         |                                                                                                                      |
|                                                                                    | I'm a Sophomore |                                                                                                    | No Response         | a lab period | a professionally printed version of the game | In a team of two (i.e., 2 people worked together on one reef gameboard) | No Response                           | No Response                                                             | No Response                                                                                                          |
| Public or State University (e.g., University of Texas or University of California) |                 | I am a STEM (Science, Technology, Engineering or Math) major (e.g., biology, chemical engineering) |                     |              |                                              |                                                                         |                                       |                                                                         |                                                                                                                      |
|                                                                                    | I'm a Senior +  |                                                                                                    | No Response         | a lab period | a professionally printed version of the game | Solo (i.e., I was the only person responsible for my reef board)        | No Response                           | No Response                                                             | No Response                                                                                                          |
| Public or State University (e.g., University of Texas or University of California) |                 |                                                                                                    |                     |              |                                              |                                                                         |                                       |                                                                         |                                                                                                                      |
|                                                                                    | No Response     | No Response                                                                                        | I knew very little  | a lab period | a professionally printed version of the game | In a team of two (i.e., 2 people worked together on one reef gameboard) | Quite a bit, I often play board games | I play online or digital games every now and then                       | I like both collaborative and competitive games                                                                      |
| Public or State University (e.g., University of Texas or University of California) |                 | I am a STEM (Science, Technology, Engineering or Math) major (e.g., biology, chemical engineering) |                     |              |                                              |                                                                         |                                       |                                                                         |                                                                                                                      |
|                                                                                    | I'm a Senior +  |                                                                                                    | I knew a few things | a lab period | a professionally printed version of the game | Solo (i.e., I was the only person responsible for my reef board)        | I play board games every now and then | Quite a bit, I often play online or digital games                       | I prefer competitive games (i.e., more one-on-one or against others)                                                 |
| Public or State University (e.g., University of Texas or University of California) |                 | I am a geoscience major (e.g., geology, geophysics, Earth sciences)                                |                     |              |                                              |                                                                         |                                       |                                                                         |                                                                                                                      |
|                                                                                    | I'm a Sophomore |                                                                                                    | No Response         | a lab period | a professionally printed version of the game | In a team of two (i.e., 2 people worked together on one reef gameboard) | No Response                           | No Response                                                             | No Response                                                                                                          |
| Public or State University (e.g., University of Texas or University of California) |                 | I am a STEM (Science, Technology, Engineering or Math) major (e.g., biology, chemical engineering) |                     |              |                                              |                                                                         |                                       |                                                                         |                                                                                                                      |
|                                                                                    | I'm a Sophomore |                                                                                                    | No Response         | a lab period | a professionally printed version of the game | Solo (i.e., I was the only person responsible for my reef board)        | No Response                           | No Response                                                             | No Response                                                                                                          |
| Public or State University (e.g., University of Texas or University of California) |                 |                                                                                                    |                     |              |                                              |                                                                         |                                       |                                                                         |                                                                                                                      |
|                                                                                    | No Response     | No Response                                                                                        | No Response         | a lab period | a professionally printed version of the game | Solo (i.e., I was the only person responsible for my reef board)        | No Response                           | No Response                                                             | No Response                                                                                                          |
| Public or State University (e.g., University of Texas or University of California) |                 | I am a STEM (Science, Technology, Engineering or Math) major (e.g., biology, chemical engineering) |                     |              |                                              |                                                                         |                                       |                                                                         |                                                                                                                      |
|                                                                                    | I'm a Junior    |                                                                                                    | No Response         | a lab period | a professionally printed version of the game | In a team of two (i.e., 2 people worked together on one reef gameboard) | No Response                           | No Response                                                             | No Response                                                                                                          |
| Public or State University (e.g., University of Texas or University of California) |                 | I am a geoscience major (e.g., geology, geophysics, Earth sciences)                                |                     |              |                                              |                                                                         |                                       |                                                                         |                                                                                                                      |
|                                                                                    | I'm a Junior    |                                                                                                    | No Response         | a lab period | a professionally printed version of the game | Solo (i.e., I was the only person responsible for my reef board)        | No Response                           | No Response                                                             | No Response                                                                                                          |
| Public or State University (e.g., University of Texas or University of California) |                 | I am a STEM (Science, Technology, Engineering or Math) major (e.g., biology, chemical engineering) |                     |              |                                              |                                                                         |                                       |                                                                         |                                                                                                                      |
|                                                                                    | I'm a Senior +  |                                                                                                    | I knew very little  | a lab period | a professionally printed version of the game | Solo (i.e., I was the only person responsible for my reef board)        | I rarely play board games             | Alot, I am an expert! Quite a bit, I often play online or digital games | I prefer competitive games (i.e., more one-on-one or against others) I like both collaborative and competitive games |
| Public or State University (e.g., University of Texas or University of California) |                 | I am a STEM (Science, Technology, Engineering or Math) major (e.g., biology, chemical engineering) |                     |              |                                              |                                                                         |                                       |                                                                         |                                                                                                                      |
|                                                                                    | I'm a Senior +  |                                                                                                    | I knew a few things | a lab period | a professionally printed version of the game | In a team of two (i.e., 2 people worked together on one reef gameboard) | Quite a bit, I often play board games | I rarely play online or digital games                                   | I prefer competitive games (i.e., more one-on-one or against others)                                                 |
| Public or State University (e.g., University of Texas or University of California) |                 |                                                                                                    |                     |              |                                              |                                                                         |                                       |                                                                         |                                                                                                                      |
|                                                                                    | No Response     | No Response                                                                                        | No Response         | a lab period | a professionally printed version of the game | Solo (i.e., I was the only person responsible for my reef board)        | No Response                           | No Response                                                             | No Response                                                                                                          |
| Public or State University (e.g., University of Texas or University of California) |                 | I am a STEM (Science, Technology, Engineering or Math) major (e.g., biology, chemical engineering) |                     |              |                                              |                                                                         |                                       |                                                                         |                                                                                                                      |
|                                                                                    | I'm a Senior +  |                                                                                                    | No Response         | a lab period | a professionally printed version of the game | In a team of two (i.e., 2 people worked together on one reef gameboard) | No Response                           | No Response                                                             | No Response                                                                                                          |
| Public or State University (e.g., University of Texas or University of California) |                 |                                                                                                    |                     |              |                                              |                                                                         |                                       |                                                                         |                                                                                                                      |
|                                                                                    | No Response     | No Response                                                                                        | No Response         | a lab period | a professionally printed version of the game | In a team of two (i.e., 2 people worked together on one reef gameboard) | No Response                           | No Response                                                             | No Response                                                                                                          |

|                                                                                    |                 |                                                                                                    |                                |              |                                              |                                                                         |                                                   |                                                   |                                                                                |
|------------------------------------------------------------------------------------|-----------------|----------------------------------------------------------------------------------------------------|--------------------------------|--------------|----------------------------------------------|-------------------------------------------------------------------------|---------------------------------------------------|---------------------------------------------------|--------------------------------------------------------------------------------|
| Public or State University (e.g., University of Texas or University of California) | No Response     | No Response                                                                                        | No Response                    | a lab period | a professionally printed version of the game | In a team of two (i.e., 2 people worked together on one reef gameboard) | No Response                                       | No Response                                       | No Response                                                                    |
| Public or State University (e.g., University of Texas or University of California) | I'm a Sophomore | I am a STEM (Science, Technology, Engineering or Math) major (e.g., biology, chemical engineering) | I didn't know any paleontology | a lab period | a professionally printed version of the game | Solo (i.e., I was the only person responsible for my reef board)        | I rarely play board games                         | I play online or digital games every now and then | I prefer collaborative games (i.e., solving something together with teammates) |
| Public or State University (e.g., University of Texas or University of California) | I'm a Freshman  | I am a STEM (Science, Technology, Engineering or Math) major (e.g., biology, chemical engineering) | I knew a few things            | a lab period | a professionally printed version of the game | Solo (i.e., I was the only person responsible for my reef board)        | I rarely play board games                         | I play online or digital games every now and then | I prefer collaborative games (i.e., solving something together with teammates) |
| Public or State University (e.g., University of Texas or University of California) | I'm a Junior    | I am a geoscience major (e.g., geology, geophysics, Earth sciences)                                | No Response                    | a lab period | a professionally printed version of the game | Solo (i.e., I was the only person responsible for my reef board)        | No Response                                       | No Response                                       | No Response                                                                    |
| Public or State University (e.g., University of Texas or University of California) | I'm a Sophomore | I am a STEM (Science, Technology, Engineering or Math) major (e.g., biology, chemical engineering) | I knew very little             | a lab period | a professionally printed version of the game | Solo (i.e., I was the only person responsible for my reef board)        | I play board games every now and then             | I rarely play online or digital games             | I prefer collaborative games (i.e., solving something together with teammates) |
| Public or State University (e.g., University of Texas or University of California) | I'm a Freshman  | I am a geoscience major (e.g., geology, geophysics, Earth sciences)                                | Strongly Agree                 | a lab period | a professionally printed version of the game | Solo (i.e., I was the only person responsible for my reef board)        | Quite a bit, I often play online or digital games | I like both collaborative and competitive games   | Quite a bit                                                                    |
| Public or State University (e.g., University of Texas or University of California) | I'm a Junior    | I am a STEM (Science, Technology, Engineering or Math) major (e.g., biology, chemical engineering) | No Response                    | a lab period | a professionally printed version of the game | Solo (i.e., I was the only person responsible for my reef board)        | No Response                                       | No Response                                       | No Response                                                                    |
| Public or State University (e.g., University of Texas or University of California) | No Response     | No Response                                                                                        | No Response                    | a lab period | a professionally printed version of the game | In a team of two (i.e., 2 people worked together on one reef gameboard) | No Response                                       | No Response                                       | No Response                                                                    |
| Public or State University (e.g., University of Texas or University of California) | I'm a Senior +  | I am a STEM (Science, Technology, Engineering or Math) major (e.g., biology, chemical engineering) | No Response                    | a lab period | a professionally printed version of the game | In a team of two (i.e., 2 people worked together on one reef gameboard) | No Response                                       | No Response                                       | No Response                                                                    |
| Public or State University (e.g., University of Texas or University of California) | No Response     | No Response                                                                                        | No Response                    | a lab period | a professionally printed version of the game | Solo (i.e., I was the only person responsible for my reef board)        | No Response                                       | No Response                                       | No Response                                                                    |
| Public or State University (e.g., University of Texas or University of California) | No Response     | No Response                                                                                        | No Response                    | a lab period | a professionally printed version of the game | In a team of two (i.e., 2 people worked together on one reef gameboard) | No Response                                       | No Response                                       | No Response                                                                    |
| Public or State University (e.g., University of Texas or University of California) | I'm a Freshman  | I am a geoscience major (e.g., geology, geophysics, Earth sciences)                                | I knew a few things            | a lab period | a professionally printed version of the game | Solo (i.e., I was the only person responsible for my reef board)        | I play board games every now and then             | Quite a bit, I often play online or digital games | I like both collaborative and competitive games                                |
| Public or State University (e.g., University of Texas or University of California) | I'm a Sophomore | I am a geoscience major (e.g., geology, geophysics, Earth sciences)                                | Quite a bit                    | a lab period | a professionally printed version of the game | Solo (i.e., I was the only person responsible for my reef board)        | Quite a bit, I often play board games             | Quite a bit, I often play online or digital games | I prefer collaborative games (i.e., solving something together with teammates) |
| Public or State University (e.g., University of Texas or University of California) | I'm a Sophomore | I am a STEM (Science, Technology, Engineering or Math) major (e.g., biology, chemical engineering) | I knew very little             | a lab period | a professionally printed version of the game | In a team of two (i.e., 2 people worked together on one reef gameboard) | Quite a bit, I often play board games             | I play online or digital games every now and then | I like both collaborative and competitive games                                |

|                                                                                    |                |                                                                                                    |                     |              |                                              |                                                                         |                                       |                                                   |                                                                                |
|------------------------------------------------------------------------------------|----------------|----------------------------------------------------------------------------------------------------|---------------------|--------------|----------------------------------------------|-------------------------------------------------------------------------|---------------------------------------|---------------------------------------------------|--------------------------------------------------------------------------------|
| Public or State University (e.g., University of Texas or University of California) | I'm a Freshman | I am undeclared                                                                                    | I knew very little  | a lab period | a professionally printed version of the game | Solo (i.e., I was the only person responsible for my reef board)        | I rarely play board games             | Alot, I am an expert!                             | I prefer competitive games (i.e., more one-on-one or against others)           |
| Public or State University (e.g., University of Texas or University of California) | I'm a Freshman | I am a geoscience major (e.g., geology, geophysics, Earth sciences)                                | I knew a few things | a lab period | a professionally printed version of the game | Solo (i.e., I was the only person responsible for my reef board)        | I play board games every now and then | Quite a bit, I often play online or digital games | I like both collaborative and competitive games                                |
| Public or State University (e.g., University of Texas or University of California) | I'm a Senior + | I am a STEM (Science, Technology, Engineering or Math) major (e.g., biology, chemical engineering) | I knew a few things | a lab period | a professionally printed version of the game | Solo (i.e., I was the only person responsible for my reef board)        | I rarely play board games             | I rarely play online or digital games             | I prefer collaborative games (i.e., solving something together with teammates) |
| Public or State University (e.g., University of Texas or University of California) | I'm a Junior   | I am a STEM (Science, Technology, Engineering or Math) major (e.g., biology, chemical engineering) | I knew a few things | a lab period | a professionally printed version of the game | In a team of two (i.e., 2 people worked together on one reef gameboard) | I play board games every now and then | Quite a bit, I often play online or digital games | I prefer collaborative games (i.e., solving something together with teammates) |
| Public or State University (e.g., University of Texas or University of California) | I'm a Freshman | I am a geoscience major (e.g., geology, geophysics, Earth sciences)                                | I knew very little  | a lab period | a professionally printed version of the game | Solo (i.e., I was the only person responsible for my reef board)        | Quite a bit, I often play board games | Quite a bit, I often play online or digital games | I prefer competitive games (i.e., more one-on-one or against others)           |
| Public or State University (e.g., University of Texas or University of California) | I'm a Freshman | I am a geoscience major (e.g., geology, geophysics, Earth sciences)                                | I knew a few things | a lab period | a professionally printed version of the game | Solo (i.e., I was the only person responsible for my reef board)        | I play board games every now and then | I play online or digital games every now and then | I like both collaborative and competitive games                                |
| Public or State University (e.g., University of Texas or University of California) | I'm a Senior + | I am a non STEM major (e.g., history, social work, art)                                            | No Response         | a lab period | a professionally printed version of the game | Solo (i.e., I was the only person responsible for my reef board)        | No Response                           | No Response                                       | No Response                                                                    |
| Public or State University (e.g., University of Texas or University of California) | No Response    | No Response                                                                                        | I knew a few things | a lab period | a professionally printed version of the game | In a team of two (i.e., 2 people worked together on one reef gameboard) | Quite a bit, I often play board games | I rarely play online or digital games             | I prefer competitive games (i.e., more one-on-one or against others)           |
| Public or State University (e.g., University of Texas or University of California) | I'm a Junior   | I am a STEM (Science, Technology, Engineering or Math) major (e.g., biology, chemical engineering) | I knew very little  | a lab period | a professionally printed version of the game | In a team of two (i.e., 2 people worked together on one reef gameboard) | I play board games every now and then | Alot, I am an expert!                             | I like both collaborative and competitive games                                |
| Public or State University (e.g., University of Texas or University of California) | I'm a Junior   | I am a geoscience major (e.g., geology, geophysics, Earth sciences)                                | I knew a few things | a lab period | a professionally printed version of the game | Solo (i.e., I was the only person responsible for my reef board)        | I play board games every now and then | I play online or digital games every now and then | I like both collaborative and competitive games                                |
| Public or State University (e.g., University of Texas or University of California) | I'm a Freshman | I am a geoscience major (e.g., geology, geophysics, Earth sciences)                                | I knew a few things | a lab period | a professionally printed version of the game | Solo (i.e., I was the only person responsible for my reef board)        | I play board games every now and then | Quite a bit, I often play online or digital games | I prefer competitive games (i.e., more one-on-one or against others)           |

|                                                                                    |                 |                                                                                                    |                                |              |                                              |                                                                         |                                       |                                                   |                                                                                |
|------------------------------------------------------------------------------------|-----------------|----------------------------------------------------------------------------------------------------|--------------------------------|--------------|----------------------------------------------|-------------------------------------------------------------------------|---------------------------------------|---------------------------------------------------|--------------------------------------------------------------------------------|
| Public or State University (e.g., University of Texas or University of California) | I'm a Senior +  | I am a STEM (Science, Technology, Engineering or Math) major (e.g., biology, chemical engineering) | I didn't know any paleontology | a lab period | a professionally printed version of the game | Solo (i.e., I was the only person responsible for my reef board)        | I play board games every now and then | Quite a bit, I often play online or digital games | I prefer competitive games (i.e., more one-on-one or against others)           |
| Public or State University (e.g., University of Texas or University of California) | I'm a Freshman  | I am a geoscience major (e.g., geology, geophysics, Earth sciences)                                | Quite a bit                    | a lab period | a professionally printed version of the game | Solo (i.e., I was the only person responsible for my reef board)        | Alot, I am an expert gamer            | Alot, I am an expert!                             | I like both collaborative and competitive games                                |
| Public or State University (e.g., University of Texas or University of California) | I'm a Freshman  | I am a geoscience major (e.g., geology, geophysics, Earth sciences)                                | I knew very little             | a lab period | a professionally printed version of the game | Solo (i.e., I was the only person responsible for my reef board)        | Quite a bit, I often play board games | I rarely play online or digital games             | I like both collaborative and competitive games                                |
| Public or State University (e.g., University of Texas or University of California) | No Response     | No Response                                                                                        | Alot, I am an expert           | a lab period | a professionally printed version of the game | Solo (i.e., I was the only person responsible for my reef board)        | I play board games every now and then | Quite a bit, I often play online or digital games | I prefer collaborative games (i.e., solving something together with teammates) |
| Public or State University (e.g., University of Texas or University of California) | I'm a Freshman  | I am a geoscience major (e.g., geology, geophysics, Earth sciences)                                | I knew a few things            | a lab period | a professionally printed version of the game | In a team of two (i.e., 2 people worked together on one reef gameboard) | I play board games every now and then | I rarely play online or digital games             | I prefer collaborative games (i.e., solving something together with teammates) |
| Public or State University (e.g., University of Texas or University of California) | No Response     | No Response                                                                                        | No Response                    | a lab period | a professionally printed version of the game | Solo (i.e., I was the only person responsible for my reef board)        | No Response                           | No Response                                       | No Response                                                                    |
| Public or State University (e.g., University of Texas or University of California) | I'm a Freshman  | I am a non STEM major (e.g., history, social work, art)                                            | I knew very little             | a lab period | a professionally printed version of the game | Solo (i.e., I was the only person responsible for my reef board)        | Quite a bit, I often play board games | Quite a bit, I often play online or digital games | I like both collaborative and competitive games                                |
| Public or State University (e.g., University of Texas or University of California) | I'm a Freshman  | I am a geoscience major (e.g., geology, geophysics, Earth sciences)                                | I knew a few things            | a lab period | a professionally printed version of the game | In a team of two (i.e., 2 people worked together on one reef gameboard) | I rarely play board games             | Alot, I am an expert!                             | I like both collaborative and competitive games                                |
| Public or State University (e.g., University of Texas or University of California) | I'm a Freshman  | I am a STEM (Science, Technology, Engineering or Math) major (e.g., biology, chemical engineering) | I knew very little             | a lab period | a professionally printed version of the game | In a team of two (i.e., 2 people worked together on one reef gameboard) | I play board games every now and then | I play online or digital games every now and then | I like both collaborative and competitive games                                |
| Public or State University (e.g., University of Texas or University of California) | No Response     | No Response                                                                                        | I knew a few things            | a lab period | a professionally printed version of the game | Solo (i.e., I was the only person responsible for my reef board)        | I play board games every now and then | I play online or digital games every now and then | I like both collaborative and competitive games                                |
| Public or State University (e.g., University of Texas or University of California) | I'm a Sophomore | I am undeclared                                                                                    | I knew very little             | a lab period | a professionally printed version of the game | In a team of two (i.e., 2 people worked together on one reef gameboard) | I play board games every now and then | Alot, I am an expert!                             | I like both collaborative and competitive games                                |
| Public or State University (e.g., University of Texas or University of California) | I'm a Freshman  | I am a geoscience major (e.g., geology, geophysics, Earth sciences)                                | Alot, I am an expert           | a lab period | a professionally printed version of the game | Solo (i.e., I was the only person responsible for my reef board)        | Alot, I am an expert gamer            | Alot, I am an expert!                             | I prefer collaborative games (i.e., solving something together with teammates) |

|                                                                                    |                |                                                                                                    |                     |              |                                              |                                                                         |                                       |                                                   |                                                                      |
|------------------------------------------------------------------------------------|----------------|----------------------------------------------------------------------------------------------------|---------------------|--------------|----------------------------------------------|-------------------------------------------------------------------------|---------------------------------------|---------------------------------------------------|----------------------------------------------------------------------|
| Public or State University (e.g., University of Texas or University of California) | I'm a Freshman | I am a geoscience major (e.g., geology, geophysics, Earth sciences)                                | I knew a few things | a lab period | a professionally printed version of the game | Solo (i.e., I was the only person responsible for my reef board)        | I play board games every now and then | I play online or digital games every now and then | I prefer competitive games (i.e., more one-on-one or against others) |
| Public or State University (e.g., University of Texas or University of California) | I'm a Freshman | I am a geoscience major (e.g., geology, geophysics, Earth sciences)                                | I knew very little  | a lab period | a professionally printed version of the game | In a team of two (i.e., 2 people worked together on one reef gameboard) | I play board games every now and then | I play online or digital games every now and then | I like both collaborative and competitive games                      |
| Public or State University (e.g., University of Texas or University of California) | I'm a Junior   | I am a STEM (Science, Technology, Engineering or Math) major (e.g., biology, chemical engineering) | No Response         | a lab period | a professionally printed version of the game | Solo (i.e., I was the only person responsible for my reef board)        | No Response                           | No Response                                       | No Response                                                          |
| Public or State University (e.g., University of Texas or University of California) | I'm a Junior   | I am a geoscience major (e.g., geology, geophysics, Earth sciences)                                | I knew very little  | a lab period | a professionally printed version of the game | Solo (i.e., I was the only person responsible for my reef board)        | I play board games every now and then | I rarely play online or digital games             | I prefer competitive games (i.e., more one-on-one or against others) |
| Public or State University (e.g., University of Texas or University of California) | I'm a Freshman | I am a geoscience major (e.g., geology, geophysics, Earth sciences)                                | I knew very little  | a lab period | a professionally printed version of the game | In a team of two (i.e., 2 people worked together on one reef gameboard) | I play board games every now and then | I rarely play online or digital games             | I like both collaborative and competitive games                      |
| Public or State University (e.g., University of Texas or University of California) | No Response    | No Response                                                                                        | I knew a few things | a lab period | a professionally printed version of the game | In a team of two (i.e., 2 people worked together on one reef gameboard) | I play board games every now and then | I play online or digital games every now and then | I like both collaborative and competitive games                      |
| Public or State University (e.g., University of Texas or University of California) | I'm a Junior   | I am a geoscience major (e.g., geology, geophysics, Earth sciences)                                | I knew a few things | a lab period | a professionally printed version of the game | In a team of two (i.e., 2 people worked together on one reef gameboard) | Quite a bit, I often play board games | Quite a bit, I often play online or digital games | I like both collaborative and competitive games                      |
| Public or State University (e.g., University of Texas or University of California) | No Response    | No Response                                                                                        | I knew a few things | a lab period | a professionally printed version of the game | In a team of two (i.e., 2 people worked together on one reef gameboard) | Quite a bit, I often play board games | A lot, I am an expert!                            | I like both collaborative and competitive games                      |
| Public or State University (e.g., University of Texas or University of California) | I'm a Freshman | I am a geoscience major (e.g., geology, geophysics, Earth sciences)                                | I knew a few things | a lab period | a professionally printed version of the game | Solo (i.e., I was the only person responsible for my reef board)        | I play board games every now and then | A lot, I am an expert!                            | I prefer competitive games (i.e., more one-on-one or against others) |
| Public or State University (e.g., University of Texas or University of California) | I'm a Freshman | I am a geoscience major (e.g., geology, geophysics, Earth sciences)                                | I knew a few things | a lab period | a professionally printed version of the game | Solo (i.e., I was the only person responsible for my reef board)        | I rarely play board games             | I play online or digital games every now and then | I like both collaborative and competitive games                      |
| Public or State University (e.g., University of Texas or University of California) | I'm a Freshman | I am a geoscience major (e.g., geology, geophysics, Earth sciences)                                | I knew very little  | a lab period | a professionally printed version of the game | In a team of two (i.e., 2 people worked together on one reef gameboard) | Quite a bit, I often play board games | I play online or digital games every now and then | I like both collaborative and competitive games                      |
| Public or State University (e.g., University of Texas or University of California) | I'm a Freshman | I am a geoscience major (e.g., geology, geophysics, Earth sciences)                                | I knew very little  | a lab period | a professionally printed version of the game | In a team of two (i.e., 2 people worked together on one reef gameboard) | I play board games every now and then | I play online or digital games every now and then | I like both collaborative and competitive games                      |

|                                                                                    |                |                                                                                                    |                                |              |                                              |                                                                         |                                       |                                                   |                                                                                |
|------------------------------------------------------------------------------------|----------------|----------------------------------------------------------------------------------------------------|--------------------------------|--------------|----------------------------------------------|-------------------------------------------------------------------------|---------------------------------------|---------------------------------------------------|--------------------------------------------------------------------------------|
| Public or State University (e.g., University of Texas or University of California) | I'm a Freshman | I am a geoscience major (e.g., geology, geophysics, Earth sciences)                                | Quite a bit                    | a lab period | a professionally printed version of the game | In a team of two (i.e., 2 people worked together on one reef gameboard) | Quite a bit, I often play board games | Quite a bit, I often play online or digital games | I prefer collaborative games (i.e., solving something together with teammates) |
| Public or State University (e.g., University of Texas or University of California) | I'm a Freshman | I am a STEM (Science, Technology, Engineering or Math) major (e.g., biology, chemical engineering) | I knew a few things            | a lab period | a professionally printed version of the game | In a team of two (i.e., 2 people worked together on one reef gameboard) | I rarely play board games             | I play online or digital games every now and then | I prefer collaborative games (i.e., solving something together with teammates) |
| Public or State University (e.g., University of Texas or University of California) | I'm a Freshman | I am a STEM (Science, Technology, Engineering or Math) major (e.g., biology, chemical engineering) | I knew a few things            | a lab period | a professionally printed version of the game | Solo (i.e., I was the only person responsible for my reef board)        | I play board games every now and then | I rarely play online or digital games             | I like both collaborative and competitive games                                |
| Public or State University (e.g., University of Texas or University of California) | I'm a Freshman | I am a geoscience major (e.g., geology, geophysics, Earth sciences)                                | I knew a few things            | a lab period | a professionally printed version of the game | In a team of two (i.e., 2 people worked together on one reef gameboard) | Quite a bit, I often play board games | A lot, I am an expert!                            | I prefer competitive games (i.e., more one-on-one or against others)           |
| Public or State University (e.g., University of Texas or University of California) | No Response    | No Response                                                                                        | I knew very little             | a lab period | a professionally printed version of the game | In a team of two (i.e., 2 people worked together on one reef gameboard) | Quite a bit, I often play board games | I rarely play online or digital games             | I like both collaborative and competitive games                                |
| Public or State University (e.g., University of Texas or University of California) | I'm a Freshman | I am a geoscience major (e.g., geology, geophysics, Earth sciences)                                | I knew a few things            | a lab period | a professionally printed version of the game | In a team of two (i.e., 2 people worked together on one reef gameboard) | I play board games every now and then | Quite a bit, I often play online or digital games | I prefer competitive games (i.e., more one-on-one or against others)           |
| Public or State University (e.g., University of Texas or University of California) | I'm a Freshman | I am a geoscience major (e.g., geology, geophysics, Earth sciences)                                | I knew a few things            | a lab period | a professionally printed version of the game | In a team of two (i.e., 2 people worked together on one reef gameboard) | I play board games every now and then | Quite a bit, I often play online or digital games | I prefer competitive games (i.e., more one-on-one or against others)           |
| Public or State University (e.g., University of Texas or University of California) | I'm a Freshman | I am a geoscience major (e.g., geology, geophysics, Earth sciences)                                | I knew a few things            | a lab period | a professionally printed version of the game | In a team of two (i.e., 2 people worked together on one reef gameboard) | I play board games every now and then | I rarely play online or digital games             | I prefer collaborative games (i.e., solving something together with teammates) |
| Public or State University (e.g., University of Texas or University of California) | I'm a Senior + | I am a STEM (Science, Technology, Engineering or Math) major (e.g., biology, chemical engineering) | I didn't know any paleontology | a lab period | a professionally printed version of the game | Solo (i.e., I was the only person responsible for my reef board)        | Quite a bit, I often play board games | Quite a bit, I often play online or digital games | I like both collaborative and competitive games                                |
| Public or State University (e.g., University of Texas or University of California) | I'm a Freshman | I am a geoscience major (e.g., geology, geophysics, Earth sciences)                                | I knew very little             | a lab period | a professionally printed version of the game | In a team of two (i.e., 2 people worked together on one reef gameboard) | I play board games every now and then | I play online or digital games every now and then | I like both collaborative and competitive games                                |
| Public or State University (e.g., University of Texas or University of California) | I'm a Freshman | I am a non-STEM major (e.g., history, social work, art)                                            | I knew a few things            | a lab period | a professionally printed version of the game | In a team of two (i.e., 2 people worked together on one reef gameboard) | I rarely play board games             | I play online or digital games every now and then | I prefer collaborative games (i.e., solving something together with teammates) |
| Public or State University (e.g., University of Texas or University of California) | No Response    | No Response                                                                                        | I knew a few things            | a lab period | a professionally printed version of the game | In a team of two (i.e., 2 people worked together on one reef gameboard) | I rarely play board games             | Quite a bit, I often play online or digital games | I like both collaborative and competitive games                                |



|                                                                                    |              |                                                                     |                     |              |                                              |                                                                         |                                       |                                       |                                                 |
|------------------------------------------------------------------------------------|--------------|---------------------------------------------------------------------|---------------------|--------------|----------------------------------------------|-------------------------------------------------------------------------|---------------------------------------|---------------------------------------|-------------------------------------------------|
| Public or State University (e.g., University of Texas or University of California) | I'm a Junior | I am a geoscience major (e.g., geology, geophysics, Earth sciences) | I knew a few things | a lab period | a professionally printed version of the game | Solo (i.e., I was the only person responsible for my reef board)        | I play board games every now and then | I rarely play online or digital games | I like both collaborative and competitive games |
|                                                                                    | No Response  | No Response                                                         | No Response         | a lab period | a professionally printed version of the game | In a team of two (i.e., 2 people worked together on one reef gameboard) | No Response                           | No Response                           | No Response                                     |

| In general, I think everyone can learn how to play online, digital, or board games. | What is your gender? (Please select all that apply) | Do you consider yourself a member of the Lesbian, Gay, Bisexual, Transgender, and/or Queer (LGBTQ+) community? | Please enter your identity below if not captured by the questions above. | With which racial and ethnic group(s) do you identify? (Please select all that apply) | Please enter your specific ethnicity below. For example: German, Korean, Columbian, Mexican American, Samoan, Canadian, Chinese (note, you can include as many groups as you need to describe yourself). | How would you describe your disability/ability status (regardless of whether or not you requested accommodations)? | How would you describe your family growing up? | Can an organism or species "prepare for" environmental changes or stresses? Explain your answer. What does this tell you about natural selection? (3 points) | Make a simple sketch about how mutation, migration, random processes, and natural selection can impact a community. How might this lead to extinction over geological timescales? (7 points) | What are the mechanisms that ADD variation to gene frequency? | Dogenetic mutations occur for the good of the organism or are they random? Do they help or hurt organisms? Or can they do both? | Which community is more likely to survive environmental change, one with lots of only a few types of reef builder, or a community with many different types of reef builder? | Total difference in score (all) | Total difference in score with missing answers removed |
|-------------------------------------------------------------------------------------|-----------------------------------------------------|----------------------------------------------------------------------------------------------------------------|--------------------------------------------------------------------------|---------------------------------------------------------------------------------------|----------------------------------------------------------------------------------------------------------------------------------------------------------------------------------------------------------|--------------------------------------------------------------------------------------------------------------------|------------------------------------------------|--------------------------------------------------------------------------------------------------------------------------------------------------------------|----------------------------------------------------------------------------------------------------------------------------------------------------------------------------------------------|---------------------------------------------------------------|---------------------------------------------------------------------------------------------------------------------------------|------------------------------------------------------------------------------------------------------------------------------------------------------------------------------|---------------------------------|--------------------------------------------------------|
| Strongly Agree                                                                      | Female, Non binary                                  | Yes                                                                                                            |                                                                          | Middle Eastern or North African, Multiracial, White                                   | Iranian-american, white passing                                                                                                                                                                          | I do not have a disability                                                                                         | Middle Income                                  | 2.5 3 0.5                                                                                                                                                    | 4 1 -3                                                                                                                                                                                       | 1 1 0                                                         | 3 2 -1                                                                                                                          | 1 1 0                                                                                                                                                                        | -3.5                            | -3.5                                                   |
| Strongly Agree                                                                      | Male                                                | No, but I identify as an ally                                                                                  |                                                                          | White                                                                                 | White American                                                                                                                                                                                           | I do not have a disability                                                                                         | Upper-Middle Income                            | 2.5 2 -0.5                                                                                                                                                   | 3 4 1                                                                                                                                                                                        | 0 0.5 0.5                                                     | 2 2 0                                                                                                                           | 1.5 1 -0.5                                                                                                                                                                   | 0.5                             | 0.5                                                    |
| Strongly Agree                                                                      | Male, Cisgender                                     | No                                                                                                             |                                                                          | White                                                                                 | German, Irish, Scottish, small amount of Native American                                                                                                                                                 | I do not have a disability                                                                                         | Lower Income                                   | 3 2 -1                                                                                                                                                       | 7 7 0                                                                                                                                                                                        | 0.5 0.5 0                                                     | 2 2 0                                                                                                                           | 1 1 0                                                                                                                                                                        | -1                              | -1                                                     |
| Strongly Agree                                                                      | Male, Cisgender                                     | No, but I identify as an ally                                                                                  |                                                                          | White                                                                                 | Hungarian, Russian, Polish                                                                                                                                                                               | I have a disability                                                                                                | Middle Income                                  | 1 3 2                                                                                                                                                        | 5 1 -4                                                                                                                                                                                       | 0.5 1 0.5                                                     | 2 2 0                                                                                                                           | 1 2 1                                                                                                                                                                        | -0.5                            | -0.5                                                   |
| Strongly Agree                                                                      | Male                                                | No                                                                                                             | Straight                                                                 | White                                                                                 | Gonna be honest here, I haven't taken a DNA test, so I don't know. Mostly White European with a smidgeon Native American.                                                                                | I do not have a disability                                                                                         | Lower-Middle Income                            | 2.5 2.5 0                                                                                                                                                    | 8 8 0                                                                                                                                                                                        | 1 1 0                                                         | 2 2 0                                                                                                                           | 1 2 1                                                                                                                                                                        | 1                               | 1                                                      |
| Agree                                                                               | Female                                              | No, but I identify as an ally                                                                                  |                                                                          | White                                                                                 | European American                                                                                                                                                                                        | I do not have a disability                                                                                         | Middle Income                                  | 0.5 0.5 0                                                                                                                                                    | 3 4 1                                                                                                                                                                                        | 1 1 0                                                         | 2 2 0                                                                                                                           | 1 2 1                                                                                                                                                                        | 2                               | 2                                                      |
| Strongly Agree                                                                      | Female, Cisgender                                   | Yes                                                                                                            | Panromantic Demisexual                                                   | White                                                                                 | Scottish, Irish, Danish, Austrian, and Romanian.                                                                                                                                                         | I do not have a disability                                                                                         | Lower-Middle Income                            | 3 0 -3                                                                                                                                                       | 6 6 0                                                                                                                                                                                        | 1 1 0                                                         | 2 3 1                                                                                                                           | 2 2 0                                                                                                                                                                        | -2                              | -2                                                     |
| Agree                                                                               | Male                                                | No                                                                                                             |                                                                          | White                                                                                 | Dutch American                                                                                                                                                                                           | I do not have a disability                                                                                         | Lower Income                                   | 0 0 0                                                                                                                                                        | 0 0 0                                                                                                                                                                                        | 1 0.5 -0.5                                                    | 2 2 0                                                                                                                           | 1 1 0                                                                                                                                                                        | -0.5                            | -0.5                                                   |
|                                                                                     |                                                     |                                                                                                                |                                                                          |                                                                                       |                                                                                                                                                                                                          |                                                                                                                    |                                                | 0 2 2                                                                                                                                                        | 1 0 -1                                                                                                                                                                                       | 0.5 0.5 0                                                     | 3 2 -1                                                                                                                          | 2 1.5 -0.5                                                                                                                                                                   | -0.5                            | -0.5                                                   |
|                                                                                     |                                                     |                                                                                                                |                                                                          |                                                                                       |                                                                                                                                                                                                          |                                                                                                                    |                                                | 0 1 1                                                                                                                                                        | 1 7 6                                                                                                                                                                                        | 0.5 0.5 0                                                     | 2 2 0                                                                                                                           | 2 2 0                                                                                                                                                                        | 7                               | 7                                                      |
|                                                                                     |                                                     |                                                                                                                |                                                                          |                                                                                       |                                                                                                                                                                                                          |                                                                                                                    |                                                | 1 2 1                                                                                                                                                        | 2 4 2                                                                                                                                                                                        | 0.5 0.5 0                                                     | 2 2 0                                                                                                                           | 2 2 0                                                                                                                                                                        | 3                               | 3                                                      |
|                                                                                     |                                                     |                                                                                                                |                                                                          |                                                                                       |                                                                                                                                                                                                          |                                                                                                                    |                                                | 0 3 3                                                                                                                                                        | 7 8 1                                                                                                                                                                                        | 0.5 0.5 0                                                     | 2 2 0                                                                                                                           | 1.5 1 -0.5                                                                                                                                                                   | 3.5                             | 3.5                                                    |
|                                                                                     |                                                     |                                                                                                                |                                                                          |                                                                                       |                                                                                                                                                                                                          |                                                                                                                    |                                                | 0.5 0.5 0                                                                                                                                                    | 6 6 0                                                                                                                                                                                        | 1 1 0                                                         | 2 2 0                                                                                                                           | 0 0.5 0.5                                                                                                                                                                    | 0.5                             | 0.5                                                    |
| Agree                                                                               | Female                                              | No                                                                                                             |                                                                          | Hispanic, Latino, Latina, LatinX, or Spanish Origin                                   | Mexican American                                                                                                                                                                                         | I do not have a disability                                                                                         | Lower Income                                   |                                                                                                                                                              |                                                                                                                                                                                              |                                                               |                                                                                                                                 |                                                                                                                                                                              |                                 |                                                        |

|                |                   |                               |  |                                                            |                                                                                        |                            |                      |     |     |      |   |   |    |     |     |      |   |     |      |     |   |    |      |
|----------------|-------------------|-------------------------------|--|------------------------------------------------------------|----------------------------------------------------------------------------------------|----------------------------|----------------------|-----|-----|------|---|---|----|-----|-----|------|---|-----|------|-----|---|----|------|
| Agree          | Male              | No                            |  | White                                                      | German, Jewish                                                                         | I do not have a disability | Lower-Middle Income  | 0   | 0   | 0    | 0 | 0 | 0  | 0   | 0   | 0    | 2 | 2   | 0    | 2   |   |    | 0    |
| Agree          | Male              | No                            |  | White                                                      | German                                                                                 | I do not have a disability | Lower-Middle Income  | 1   | 3   | 2    | 0 | 0 | 0  | 0.5 | 0.5 | 0    | 2 | 2   | 0    | 2   |   |    | 2    |
| Agree          | Female            | Yes                           |  | White                                                      | Irish, German, Polish                                                                  | I have a disability        | Lower-Middle Income  | 0   | 0   | 0    | 2 | 3 | 1  | 0.5 | 0.5 | 0    | 2 | 2   | 0    | 2   |   |    | 1    |
| Agree          | Female            | No                            |  | White                                                      | Minnesotan                                                                             | I do not have a disability | Middle Income        | 2   | 2.5 | 0.5  | 3 | 4 | 1  | 1   | 1   | 0    | 2 | 3   | 1    | 2   |   |    | 2.5  |
| Agree          | Female            | Yes                           |  | White                                                      | Swedish                                                                                | I do not have a disability | Middle Income        | 2   | 2   | 0    | 7 | 6 | -1 | 1   | 1   | 0    | 2 | 2   | 0    | 2   |   |    | -1   |
| Neutral        | Female            | Yes                           |  | White                                                      | white                                                                                  | I do not have a disability | Lower-Middle Income  | 0   | 1   | 1    | 0 | 0 | 0  | 0   | 0   | 0    | 2 | 0   | -2   | 2   |   |    | -1   |
| Strongly Agree | Female            | Yes                           |  | White                                                      | Italian, French, Scandinavian                                                          | I have a disability        | Upper-Middle Income  | 0   | 0   | 0    | 6 | 8 | 2  | 0.5 | 0.5 | 0    | 2 | 2   | 0    | 2   |   |    | 2    |
| Agree          | Male              | No                            |  | White                                                      | German, Irish                                                                          | I do not have a disability | Lower-Middle Income  | 1   | 1   | 0    | 6 | 0 | -6 | 0.5 | 0.5 | 0    | 2 | 3   | 1    | 2   |   |    | -5   |
| Strongly Agree | Female            | No, but I identify as an ally |  | White                                                      | idk                                                                                    | I do not have a disability | Upper-Middle Income  | 2   | 1.5 | -0.5 | 0 | 1 | 1  | 0.5 | 0.5 | 0    | 2 | 2   | 0    | 1.5 |   |    | 0.5  |
| Agree          | Female, Cisgender | No, but I identify as an ally |  | White                                                      | I am very white: German, Scandinavian, and British, primarily.                         | Prefer not to say          | Upper-Middle Income  | 2   | 2   | 0    | 4 | 0 | -4 | 0.5 | 0.5 | 0    | 3 | 3   | 0    | 2   |   |    | -4   |
| Strongly Agree | Female            | Yes                           |  | White                                                      | Italian, German, Belgian, general American white person melting pot of western Europe. | I do not have a disability | Lower-Middle Income  | 0.5 | 1.5 | 1    | 8 | 4 | -4 | 0.5 | 1   | 0.5  | 3 | 2   | -1   | 2   | 2 | 0  | -3.5 |
| Agree          | Prefer not to say | Prefer not to say             |  | Prefer not to say                                          | no                                                                                     | Prefer not to say          | Prefer not to answer | 0   | 0.5 | 0.5  | 0 | 1 | 1  | 0.5 | 0   | -0.5 | 3 | 3   | 0    | 1   | 2 | 1  | 2    |
| Agree          | Prefer not to say | Prefer not to say             |  | Prefer not to say                                          | .                                                                                      | Prefer not to say          | Prefer not to answer | 3   | 2.5 | -0.5 | 8 | 5 | -3 | 1   | 1   | 0    | 2 | 2   | 0    | 2   | 1 | -1 | -4.5 |
| Agree          | Female, Cisgender | No, but I identify as an ally |  | Hispanic, Latino, Latina, LatinX, or Spanish Origin, White | Mexican American                                                                       | I do not have a disability | Lower Income         | 0   | 0.5 | 0.5  | 3 | 2 | -1 | 0   | 1   | 1    | 3 | 0.5 | -2.5 | 1   | 1 | 0  | -2   |
| Neutral        | Genderqueer       | Yes                           |  | White                                                      | American (idk specific heritage)                                                       | I do not have a disability | Lower Income         | 0   | 0   | 0    | 8 | 4 | -4 | 0.5 | 0.5 | 0    | 2 | 2   | 0    | 1   | 1 | 0  | -4   |
| Agree          | Female            | No, but I identify as an ally |  | White                                                      | American                                                                               | I do not have a disability | High Income          | 1   | 2   | 1    | 5 | 3 | -2 | 0.5 | 0.5 | 0    | 2 | 0.5 | -1.5 | 1   | 1 | 0  | -2.5 |

|                |                 |                               |          |                                                                                     |                                                    |                            |                      |     |     |     |     |     |      |     |     |      |   |   |    |   |   |    |      |      |
|----------------|-----------------|-------------------------------|----------|-------------------------------------------------------------------------------------|----------------------------------------------------|----------------------------|----------------------|-----|-----|-----|-----|-----|------|-----|-----|------|---|---|----|---|---|----|------|------|
| Strongly Agree | Female          | No, but I identify as an ally |          | Southeast Asian (e.g., Cambodian, Indonesian, Thai, Malaysian)), Multiracial, White | Vietnamese Dutch                                   | I do not have a disability | Middle Income        | 0   | 2.5 | 2.5 | 8   | 6   |      | 1   | 1   | 0    | 2 | 2 | 0  | 2 | 2 | 0  | 2.5  | 2.5  |
| Neutral        | Male            | No                            |          | South Asian (e.g., Indian, Nepali, Pakistani)                                       | Indian                                             | I do not have a disability | Lower-Middle Income  | 2   | 2   | 0   | 0   | 3   | 3    | 0   | 0.5 | 0.5  | 3 | 3 | 0  | 2 | 2 | 0  | 3.5  | 3.5  |
| Strongly Agree | Male, Cisgender | No, but I identify as an ally |          | White                                                                               | American                                           | I do not have a disability | Upper-Middle Income  | 2.5 | 3   | 0.5 | 0   | 2   | 2    | 0   | 0   | 0    | 3 | 2 | -1 | 2 | 2 | 0  | 1.5  | 1.5  |
| Strongly Agree | Male, Cisgender | No                            |          | Black, African, or African American                                                 | African-American                                   | Prefer not to say          | Prefer not to answer |     |     |     |     |     |      |     |     |      |   |   |    |   |   |    |      |      |
|                |                 |                               |          |                                                                                     |                                                    |                            |                      | 0   | 0.5 | 0.5 | 1   | 0   | -1   | 0.5 | 0.5 | 0    | 2 | 2 | 0  | 1 | 1 | 0  | -0.5 | -0.5 |
| Agree          | Female          | Yes                           | Bisexual | White                                                                               | American                                           | I do not have a disability | Middle Income        |     |     |     | 5   | 6   | 1    |     |     |      | 2 | 2 | 0  |   |   |    | 1    |      |
| Agree          | Female          | No                            |          | East Asian (e.g., Chinese, Japanese, Korean)                                        | Vietnamese                                         | Prefer not to say          | Prefer not to answer |     |     |     | 1   | 2.5 | 1.5  |     |     |      | 2 | 1 | -1 |   |   |    | 0.5  |      |
| Strongly Agree | Male            | No                            |          | White                                                                               | American, mostly of Scandinavian and Irish descent | I do not have a disability | Middle Income        | 2   | 1   | -1  | 0   | 0   | 0    |     |     |      | 2 | 3 | 1  | 1 | 1 | 0  | 0    |      |
|                |                 |                               |          |                                                                                     |                                                    |                            |                      |     |     |     |     |     |      |     |     |      | 2 | 2 | 0  |   |   |    |      |      |
|                |                 |                               |          |                                                                                     |                                                    |                            |                      |     |     |     |     |     |      |     |     |      | 1 | 1 | 0  |   |   |    |      |      |
|                |                 |                               |          |                                                                                     |                                                    |                            |                      |     |     |     | 3   | 3   | 0    |     |     |      | 3 | 3 | 0  |   |   |    |      |      |
|                |                 |                               |          |                                                                                     |                                                    |                            |                      |     |     |     | 3.5 | 3   | -0.5 |     |     |      | 0 | 2 | 2  |   |   |    | 1.5  |      |
|                |                 |                               |          |                                                                                     |                                                    |                            |                      |     |     |     | 0   | 0   | 0    | 0.5 | 0   | -0.5 | 3 | 0 | -3 | 2 | 0 | -2 | -5.5 | -5.5 |
|                |                 |                               |          |                                                                                     |                                                    |                            |                      | 0   | 0   | 0   | 0   | 0   | 0    | 0   | 0   | 0    | 2 | 1 | -1 | 0 | 2 | 2  | 1    | 1    |
| Agree          | Male            | No                            |          | White                                                                               | German                                             | I do not have a disability | High Income          | 0   | 1   | 1   | 3   | 5   | 2    | 0.5 | 1   | 0.5  | 2 | 3 | 1  | 2 | 2 | 0  | 4.5  | 4.5  |
| Agree          | Female          | No                            |          | White                                                                               | American                                           | I do not have a disability | Upper-Middle Income  | 0   | 0   | 0   | 5   | 8   | 3    | 0.5 | 0.5 | 0    | 2 | 2 | 0  | 0 | 0 | 0  | 3    | 3    |
| Agree          | Female          | No                            |          | White                                                                               | n/a                                                | I do not have a disability | Middle Income        | 0   | 1   | 1   | 0   | 0   | 0    | 0.5 | 0.5 | 0    | 2 | 2 | 0  | 2 | 2 | 0  | 1    | 1    |

|                |                   |                               |  |                                                     |                                         |                            |                                                                                      |      |      |     |      |      |      |      |      |      |      |      |    |      |      |    |      |      |
|----------------|-------------------|-------------------------------|--|-----------------------------------------------------|-----------------------------------------|----------------------------|--------------------------------------------------------------------------------------|------|------|-----|------|------|------|------|------|------|------|------|----|------|------|----|------|------|
| Strongly Agree | Male              | No                            |  | White                                               | Half Italian, half southern Appalachian | I do not have a disability | Started lower, parents business caught on and lived better in my later years at home | 0    | 0.5  | 0.5 | 5    | 4    | -1   | 0.5  | 0.5  | 0    | 3    | 2    | -1 | 2    | 1    | -1 | -2.5 | -2.5 |
| Agree          | Male              | No, but I identify as an ally |  | White                                               | Irish                                   | I do not have a disability | Lower-Middle Income                                                                  | 1    | 0    | -1  | 2.5  | 4    | 1.5  | 0.5  | 0.5  | 0    | 2    | 2    | 0  | 2    | 2    | 0  | 0.5  | 0.5  |
| Agree          | Male              | No                            |  | White                                               | American                                | I do not have a disability | Middle Income                                                                        | 1    | 1    | 0   | 2.5  | 4    | 1.5  | 0.5  | 0.5  | 0    | 2    | 2    | 0  | 1    | 2    | 1  | 2.5  | 2.5  |
| Strongly Agree | Male              | No, but I identify as an ally |  | White                                               | Pasty                                   | I have a disability        | Lower-Middle Income                                                                  | 0.5  | 1    | 0.5 | 3.5  | 4    | 0.5  | 0.5  | 0.5  | 0    | 2    | 2    | 0  | 1    | 2    | 1  | 2    | 2    |
| Agree          | Prefer not to say | Prefer not to say             |  | Prefer not to say                                   | American                                | I do not have a disability | Middle Income                                                                        | 0    | 0    | 0   |      |      |      | 0.5  | 0.5  | 0    | 2    | 2    | 0  | 2    | 2    | 0  | 0    |      |
| Agree          | Male              | No                            |  | White                                               | English, Irish, German, Swedish         | I do not have a disability | Middle Income                                                                        | 0    | 0    | 0   | 0    | 0.5  | 0.5  | 0.5  | 0    | -0.5 | 2    | 0    | -2 | 2    | 2    | 0  | -2   | -2   |
| Strongly Agree | Female            | No                            |  | White                                               | Western European                        | I do not have a disability | Middle Income                                                                        | 0    | 0    | 0   | 1    | 1    | 0    | 0.5  | 0.5  | 0    | 2    | 2    | 0  | 2    | 2    | 0  | 0    | 0    |
|                |                   |                               |  |                                                     |                                         |                            |                                                                                      | 1    | 2    | 1   |      |      |      | 0.5  | 0.5  | 0    | 1    | 2    | 1  | 2    | 2    | 0  | 2    |      |
|                |                   |                               |  |                                                     |                                         |                            |                                                                                      | 1    | 1    | 0   | 3    | 2.5  | -0.5 | 0    | 0.5  | 0.5  | 2    | 2    | 0  | 2    | 2    | 0  | 0    | 0    |
|                |                   |                               |  |                                                     |                                         |                            |                                                                                      | 2    | 2.5  | 0.5 | 1.5  | 0    | -1.5 | 0    | 0    | 0    | 2    | 2    | 0  | 2    | 1    | -1 | -2   | -2   |
|                |                   |                               |  |                                                     |                                         |                            |                                                                                      |      |      |     |      |      | 0    | 0.5  | 0.5  | 0    |      |      |    |      |      |    | 0    |      |
|                |                   |                               |  |                                                     |                                         |                            |                                                                                      | 0.00 | 0.00 | 0   | 4.00 | 4.00 | 0    | 0.50 | 1.00 | 0.5  | 2.00 | 1.00 | -1 | 2.00 | 2.00 | 0  | -0.5 | -0.5 |
| Agree          | Female            | Yes                           |  | Hispanic, Latino, Latina, LatinX, or Spanish Origin | German, Mexican American                | I have a disability        | Middle Income, Lower-Middle Income                                                   | 1    |      |     | 3    |      |      | 0.5  |      |      | 2    |      |    | 2    |      |    | 0    |      |
| Strongly Agree | Male              | No                            |  | White                                               | German, Irish, Scottish                 | I do not have a disability | Middle Income                                                                        | 1    | 2    | 1   |      |      | 0    | 0.5  | 0    | -0.5 | 2    | 2    | 0  | 1    | 1    | 0  | 0.5  |      |

|                |                   |                               |         |                                                                                                           |                                                                                          |                            |                     |     |     |      |     |   |   |     |     |     |   |   |    |   |   |    |      |      |
|----------------|-------------------|-------------------------------|---------|-----------------------------------------------------------------------------------------------------------|------------------------------------------------------------------------------------------|----------------------------|---------------------|-----|-----|------|-----|---|---|-----|-----|-----|---|---|----|---|---|----|------|------|
| Strongly Agree | Female, Cisgender | No, but I identify as an ally |         | White                                                                                                     | German, spanish, jewish                                                                  | Prefer not to say          | Middle Income       | 1   | 1.5 | 0.5  |     |   | 0 | 0   | 0.5 | 0.5 | 2 | 2 | 0  | 1 | 1 | 0  | 1    |      |
| Agree          | Female            | No, but I identify as an ally |         | White                                                                                                     | Dutch, German, and Italian                                                               | I do not have a disability | Lower-Middle Income | 0   | 0   | 0    | 0   | 2 | 2 | 0.5 | 0.5 | 0   | 2 | 2 | 0  | 2 | 1 | -1 | 1    |      |
| Strongly Agree | Male              | Yes                           |         | White                                                                                                     | Irish, Polish, English, other white European ties                                        | I do not have a disability | Upper-Middle Income | 0   | 1   | 1    | 1   | 1 | 0 | 0.5 | 0.5 | 0   | 3 | 3 | 0  | 2 | 1 | -1 | 0    | 1    |
| Strongly Agree | Female, Cisgender | No                            |         | American Indian or Alaska Native, Hispanic, Latino, Latina, LatinX, or Spanish Origin, Multiracial, White | Norwegian, Scottish, European, Mexican, Spanish, Swedish, American Indian, Welsh, German | I do not have a disability | Middle Income       | 0.5 | 0   | -0.5 |     |   | 0 | 1   | 1   | 0   | 2 | 2 | 0  | 2 | 2 | 0  | -0.5 |      |
| Strongly Agree | Male              | No                            |         | White                                                                                                     | German and Hispanic                                                                      | I do not have a disability | Middle Income       | 1.5 |     |      | 5.5 |   |   | 0.5 |     |     | 2 |   |    | 2 |   |    | 0    |      |
| Strongly Agree | Non binary        | Yes                           |         | White                                                                                                     | Polish                                                                                   | I do not have a disability | Upper-Middle Income | 1   |     |      | 4   |   |   | 1   |     |     | 3 |   |    | 1 |   |    | 0    |      |
| Strongly Agree | Male              | No                            |         | White                                                                                                     | German-Italian American                                                                  | I do not have a disability | High Income         |     |     |      |     |   |   |     |     |     |   |   |    |   |   |    | 0    |      |
| Agree          | Female, Cisgender | No, but I identify as an ally |         | Hispanic, Latino, Latina, LatinX, or Spanish Origin                                                       | Mexican American                                                                         | I do not have a disability | Middle Income       |     |     |      |     |   |   |     |     |     |   |   |    |   |   |    | 0    |      |
| Strongly Agree | Male, Cisgender   | No, but I identify as an ally |         | White                                                                                                     | Scottish American, Irish American                                                        | Prefer not to say          | Upper-Middle Income |     |     |      |     |   |   |     |     |     |   |   |    |   |   |    | 0    |      |
| Strongly Agree | Female            | Yes                           |         | White                                                                                                     | N/A                                                                                      | I have a disability        | Upper-Middle Income |     |     |      |     |   |   |     |     |     |   |   |    |   |   |    | 0    |      |
| Agree          | Male              | No, but I identify as an ally |         | Hispanic, Latino, Latina, LatinX, or Spanish Origin                                                       | Hispanic                                                                                 | I have a disability        | Middle Income       |     |     |      |     |   |   |     |     |     |   |   |    |   |   |    | 0    |      |
| Neutral        | Male              | No                            | Stright | Hispanic, Latino, Latina, LatinX, or Spanish Origin                                                       | Paraguayan                                                                               | I do not have a disability | High Income         | 1.5 | 2   | 0.5  | 1   | 1 | 0 | 0.5 | 0.5 | 0   | 3 | 2 | -1 | 2 | 2 | 0  | -0.5 | -0.5 |
| Strongly Agree | Female            | Yes                           |         | White                                                                                                     | Some sort of European                                                                    | I do not have a disability | Middle Income       | 0   |     |      | 1   |   |   | 0   |     |     | 3 |   |    | 2 |   |    | 0    |      |
| Strongly Agree | Male              | No                            |         | White                                                                                                     | American                                                                                 | I do not have a disability | Middle Income       | 1   |     |      | 2   |   |   | 0   |     |     | 2 |   |    | 1 |   |    | 0    |      |

|                |        |     |  |                                                                                                           |                                                   |                            |                     |   |     |     |   |   |    |     |     |      |     |   |     |     |   |      |      |
|----------------|--------|-----|--|-----------------------------------------------------------------------------------------------------------|---------------------------------------------------|----------------------------|---------------------|---|-----|-----|---|---|----|-----|-----|------|-----|---|-----|-----|---|------|------|
| Neutral        | Female | Yes |  | White                                                                                                     | American                                          | I do not have a disability | Middle Income       | 0 | 0   | 0   | 0 | 6 | 6  | 0.5 | 0.5 | 0    | 2   | 2 | 0   | 2   | 1 | -1   | 5    |
| Agree          | Male   | No  |  | American Indian or Alaska Native, Hispanic, Latino, Latina, LatinX, or Spanish Origin, Multiracial, White | White, Mexican American, Cherokee Native American | I do not have a disability | Upper-Middle Income | 0 | 0   | 0   | 6 | 5 | -1 | 0   | 0   | 0    | 1   | 2 | 1   | 2   | 1 | -1   | -1   |
| Strongly Agree | Male   | No  |  | White                                                                                                     | Caucasian                                         | I do not have a disability | Upper-Middle Income | 2 | 2   | 0   | 7 | 3 | -4 | 1   | 0.5 | -0.5 | 2   | 2 | 0   | 2   | 2 | 0    | -4.5 |
| Strongly Agree | Female | No  |  | White                                                                                                     | Primarily German, Native American/Irish           | I have a disability        | Middle Income       | 2 | 2   | 0   | 4 | 0 | -4 | 0.5 | 0.5 | 0    | 2   | 2 | 0   | 1   | 1 | 0    | -4   |
|                |        |     |  |                                                                                                           |                                                   |                            |                     | 2 |     |     | 4 |   |    | 0.5 |     |      | 2   |   |     | 2   |   |      | 0    |
|                |        |     |  |                                                                                                           |                                                   |                            |                     | 0 |     |     | 5 |   |    | 0   |     |      | 2   |   |     | 1   |   |      | 0    |
|                |        |     |  |                                                                                                           |                                                   |                            |                     | 0 | 0   | 0   | 6 | 3 | -3 | 0   | 0.5 | 0.5  | 1.5 | 2 | 0.5 | 1.5 | 1 | -0.5 | -2.5 |
|                |        |     |  |                                                                                                           |                                                   |                            |                     | 0 | 0   | 0   | 3 | 1 | -2 | 0   | 0.5 | 0.5  | 2   | 2 | 0   | 2   | 2 | 0    | -1.5 |
|                |        |     |  |                                                                                                           |                                                   |                            |                     | 0 | 0   | 0   | 5 | 4 | -1 | 0.5 | 0.5 | 0    | 1.5 | 2 | 0.5 | 2   | 2 | 0    | -0.5 |
|                |        |     |  |                                                                                                           |                                                   |                            |                     | 0 | 0   | 0   | 5 | 5 | 0  | 1   | 0.5 | -0.5 | 3   | 2 | -1  | 1.5 | 2 | 0.5  | -1   |
|                |        |     |  |                                                                                                           |                                                   |                            |                     | 0 | 1   | 1   | 4 | 5 | 1  | 0   | 0.5 | 0.5  | 2   | 2 | 0   | 1   | 2 | 1    | 3.5  |
|                |        |     |  |                                                                                                           |                                                   |                            |                     | 0 |     |     | 0 |   |    | 0.5 |     |      | 2   |   |     | 1   |   |      | 0    |
|                |        |     |  |                                                                                                           |                                                   |                            |                     | 0 | 0   | 0   | 0 | 0 | 0  | 0   | 0.5 | 0.5  | 2   | 2 | 0   | 0   | 1 | 1    | 1.5  |
|                |        |     |  |                                                                                                           |                                                   |                            |                     | 0 |     | 0   | 0 |   |    | 0.5 |     |      | 2   |   |     | 1.5 |   |      | 0    |
|                |        |     |  |                                                                                                           |                                                   |                            |                     | 0 | 2   | 2   | 0 | 1 | 1  | 0.5 | 0   | -0.5 | 2   | 2 | 0   | 1   | 2 | 1    | 3.5  |
|                |        |     |  |                                                                                                           |                                                   |                            |                     | 0 |     |     | 0 |   |    | 0.5 |     |      | 2   |   |     | 2   |   |      | 0    |
|                |        |     |  |                                                                                                           |                                                   |                            |                     | 0 |     |     | 3 |   |    | 0.5 |     |      | 2   |   |     | 1.5 |   |      | 0    |
|                |        |     |  |                                                                                                           |                                                   |                            |                     | 0 |     |     | 4 |   |    | 0.5 |     |      | 2   |   |     | 2   |   |      | 0    |
|                |        |     |  |                                                                                                           |                                                   |                            |                     | 0 | 1.5 | 1.5 | 0 | 1 | 1  | 0.5 | 0   | -0.5 | 2   | 2 | 0   | 2   | 1 | -1   | 1    |
|                |        |     |  |                                                                                                           |                                                   |                            |                     | 1 | 2   | 1   | 3 | 1 | -2 | 0.5 | 0.5 | 0    | 2   | 2 | 0   | 2   | 2 | 0    | -1   |
|                |        |     |  |                                                                                                           |                                                   |                            |                     |   | 0   |     |   | 2 | 2  |     | 0.5 | 0.5  |     | 2 |     |     | 2 |      | 2.5  |

|                |                   |                               |  |                                                            |                                         |                            |                      |     |     |     |   |   |    |     |     |     |     |   |      |     |     |      |      |      |
|----------------|-------------------|-------------------------------|--|------------------------------------------------------------|-----------------------------------------|----------------------------|----------------------|-----|-----|-----|---|---|----|-----|-----|-----|-----|---|------|-----|-----|------|------|------|
|                |                   |                               |  |                                                            |                                         |                            |                      | 0   |     |     | 1 |   | 0  |     | 2   |     | 0   |   | 0    |     |     |      |      |      |
|                |                   |                               |  |                                                            |                                         |                            |                      |     |     |     |   |   |    |     |     |     |     |   |      |     |     |      |      |      |
| Strongly Agree | Female            | No, but I identify as an ally |  | White                                                      | Irish-American                          | I do not have a disability | Middle Income        | 2   | 2   | 0   | 3 | 3 | 0  | 0.5 | 0.5 | 0   | 2   | 2 | 0    | 1.5 | 1   | -0.5 | -0.5 | -0.5 |
| Strongly Agree | Female            | No                            |  | Hispanic, Latino, Latina, LatinX, or Spanish Origin        | Hispanic                                | Prefer not to say          | Upper-Middle Income  | 2   | 2   | 0   | 6 | 7 | 1  | 0.5 | 1   | 0.5 | 3   | 2 | -1   | 2   | 1.5 | -0.5 | 0    | 0    |
| Strongly Agree | Female            | Yes                           |  | White                                                      | British                                 | I do not have a disability | Lower-Middle Income  | 2   | 2.5 | 0.5 | 4 | 3 | -1 | 0.5 | 0.5 | 0   | 2   | 2 | 0    | 2   | 2   | 0    | -0.5 | -0.5 |
| Strongly Agree | Female, Cisgender | No, but I identify as an ally |  | White                                                      | White                                   | I do not have a disability | Upper-Middle Income  | 2.5 | 2.5 | 0   | 6 | 6 | 0  | 1   | 1   | 0   | 3   | 3 | 0    | 2   | 1   | -1   | -1   | -1   |
| Agree          | Female, Cisgender | Yes                           |  | White                                                      | German, Irish                           | I do not have a disability | Middle Income        | 2   | 2.5 | 0.5 | 4 | 3 | -1 | 0.5 | 1   | 0.5 | 2   | 2 | 0    | 2   | 2   | 0    | 0    | 0    |
| Strongly Agree | Male              | No                            |  | White                                                      | Irish, English, Scottish                | I do not have a disability | Lower-Middle Income  | 0   | 3   | 3   | 3 | 3 | 0  | 1   | 0   | -1  | 2   | 2 | 0    | 2   | 2   | 0    | 2    | 2    |
| Strongly Agree | Male              | No                            |  | American Indian or Alaska Native, White                    | Polish, Potawatomi, Scots-Irish, French | I do not have a disability | Lower-Middle Income  | 2   | 2.5 | 0.5 | 5 | 5 | 0  | 0.5 | 0.5 | 0   | 3   | 3 | 0    | 1   | 2   | 1    | 1.5  | 1.5  |
| Strongly Agree | Female            | Yes                           |  | White                                                      | Mostly white.                           | I do not have a disability | Upper-Middle Income  | 2.5 | 2.5 | 0   | 7 | 7 | 0  | 0.5 | 0.5 | 0   | 3   | 2 | -1   | 2   | 2   | 0    | -1   | -1   |
| Strongly Agree | Female            | No, but I identify as an ally |  | White                                                      | I am white                              | I do not have a disability | Upper-Middle Income  | 2   | 2.5 | 0.5 | 2 | 2 | 0  | 0.5 | 0.5 | 0   | 2   | 2 | 0    | 1.5 | 1   | -0.5 | 0    | 0    |
| Strongly Agree | Male              | No                            |  | White                                                      | American                                | I do not have a disability | Lower-Middle Income  | 0   | 0   | 0   | 6 | 4 | -2 | 0.5 | 0.5 | 0   | 3   | 1 | -2   | 2   | 1   | -1   | -5   | -5   |
| Agree          | Male              | No, but I identify as an ally |  | White                                                      | italian                                 | I do not have a disability | Upper-Middle Income  | 2.5 | 2.5 | 0   | 0 | 0 | 0  | 0   | 1   | 1   | 3   | 3 | 0    | 1.5 | 2   | 0.5  | 1.5  | 1.5  |
| Agree          | Male              | No                            |  | Prefer not to say                                          | White                                   | I do not have a disability | Prefer not to answer | 1.5 | 1.5 | 0   | 3 | 4 | 1  | 0.5 | 1   | 0.5 | 3   | 2 | -1   | 2   | 2   | 0    | 0.5  | 0.5  |
| Agree          | Female            | No, but I identify as an ally |  | Hispanic, Latino, Latina, LatinX, or Spanish Origin, White | Argentinian-Italian                     | I do not have a disability | Middle Income        | 0.5 | 2.5 | 2   | 3 | 1 | -2 | 1   | 1   | 0   | 2   | 2 | 0    | 2   | 2   | 0    | 0    | 0    |
|                |                   |                               |  |                                                            |                                         |                            |                      | 2   | 0   | -2  | 0 | 2 | 2  | 0.5 | 1   | 0.5 | 2.5 | 2 | -0.5 | 0   | 2   | 2    | 2    | 2    |



|                |        |                               |  |                                                                         |                               |                            |                     |     |     |      |   |   |    |     |     |     |     |   |     |     |   |      |      |      |
|----------------|--------|-------------------------------|--|-------------------------------------------------------------------------|-------------------------------|----------------------------|---------------------|-----|-----|------|---|---|----|-----|-----|-----|-----|---|-----|-----|---|------|------|------|
|                |        |                               |  |                                                                         |                               |                            |                     | 1   | 2.5 | 1.5  | 4 | 4 | 0  | 0.5 | 0.5 | 0   | 2   | 2 | 0   | 1.5 | 1 | -0.5 | 1    | 1    |
|                |        |                               |  |                                                                         |                               |                            |                     | 2   | 1.5 | -0.5 | 3 | 1 | -2 | 0   | 1   | 1   | 3   | 3 | 0   | 2   | 2 | 0    | -1.5 | -1.5 |
|                |        |                               |  |                                                                         |                               |                            |                     | 1   | 1   | 0    | 7 | 7 | 0  | 1   | 1   | 0   | 2   | 2 | 0   | 1.5 | 2 | 0.5  | 0.5  | 0.5  |
|                |        |                               |  |                                                                         |                               |                            |                     | 2.5 | 2.5 | 0    | 5 | 5 | 0  | 1   | 1   | 0   | 2   | 2 | 0   | 1.5 | 2 | 0.5  | 0.5  | 0.5  |
|                |        |                               |  |                                                                         |                               |                            |                     | 2   | 2   | 0    | 7 | 8 | 1  | 1   | 1   | 0   | 2   | 3 | 1   | 1.5 | 1 | -0.5 | 1.5  | 1.5  |
| Agree          | Female | Yes                           |  | White                                                                   | White - German, Irish, French | I do not have a disability | Lower-Middle Income |     |     |      |   |   |    |     |     |     |     |   |     |     |   |      |      |      |
|                |        |                               |  |                                                                         |                               |                            |                     | 1   | 0   | -1   | 3 | 4 | 1  | 0.5 | 1   | 0.5 | 3   | 3 | 0   | 2   |   |      |      | 0.5  |
| Agree          | Male   | No, but I identify as an ally |  | Hispanic, Latino, Latina, LatinX, or Spanish Origin, Multiracial, White | Mexican American              | I do not have a disability | Lower-Middle Income |     |     |      |   |   |    |     |     |     |     |   |     |     |   |      |      |      |
|                |        |                               |  |                                                                         |                               |                            |                     | 1   | 2   | 1    | 1 | 3 | 2  | 0.5 | 0.5 | 0   | 1.5 | 2 | 0.5 | 2   |   |      |      | 3.5  |
| Agree          | Male   | No                            |  | South Asian (e.g., Indian, Nepali, Pakistani)                           | indian                        | I do not have a disability | Lower-Middle Income |     |     |      |   |   |    |     |     |     |     |   |     |     |   |      |      |      |
|                |        |                               |  |                                                                         |                               |                            |                     | 1   | 2   | 1    | 5 | 7 | 2  | 0.5 | 0.5 | 0   | 3   | 3 | 0   | 2   | 2 | 0    | 3    | 3    |
| Strongly Agree | Male   | No, but I identify as an ally |  | Hispanic, Latino, Latina, LatinX, or Spanish Origin, White              | Mexican and German            | I do not have a disability | Middle Income       |     |     |      |   |   |    |     |     |     |     |   |     |     |   |      |      |      |
|                |        |                               |  |                                                                         |                               |                            |                     | 0   | 0   | 0    | 6 | 3 | -3 | 0.5 | 0.5 | 0   | 2   | 2 | 0   | 2   |   |      |      | -3   |
| Strongly Agree | Female | No                            |  | Hispanic, Latino, Latina, LatinX, or Spanish Origin, White              | Mexican American              | I do not have a disability | Lower Income        |     |     |      |   |   |    |     |     |     |     |   |     |     |   |      |      |      |
|                |        |                               |  |                                                                         |                               |                            |                     | 0   | 2   | 2    | 1 | 4 | 3  | 0.5 | 0.5 | 0   | 2   | 2 | 0   | 2   |   |      |      | 5    |
| Agree          | Male   | No                            |  | White                                                                   | European Jewish               | I do not have a disability | Upper-Middle Income |     |     |      |   |   |    |     |     |     |     |   |     |     |   |      |      |      |
|                |        |                               |  |                                                                         |                               |                            |                     | 1.5 | 2.5 | 1    | 0 | 0 | 0  | 0   | 0   | 0   | 2   | 2 | 0   | 2   |   |      |      | 1    |
| Strongly Agree | Female | No                            |  | White                                                                   | American                      | I do not have a disability | Upper-Middle Income |     |     |      |   |   |    |     |     |     |     |   |     |     |   |      |      |      |
|                |        |                               |  |                                                                         |                               |                            |                     | 0.5 |     |      | 1 |   |    | 0.5 |     |     | 2   |   |     | 1.5 |   |      |      | 0    |
| Agree          | Female | No                            |  | White                                                                   | N/A                           | I do not have a disability | Lower-Middle Income |     |     |      |   |   |    |     |     |     |     |   |     |     |   |      |      |      |
|                |        |                               |  |                                                                         |                               |                            |                     | 0.5 | 0.5 | 0    | 2 | 3 | 1  | 1   | 1   | 0   | 2   | 2 | 0   | 2   |   |      |      | 1    |

|                |                   |                               |  |                                                     |                              |                            |                     |   |     |     |   |   |    |     |     |      |     |     |    |     |   |     |      |
|----------------|-------------------|-------------------------------|--|-----------------------------------------------------|------------------------------|----------------------------|---------------------|---|-----|-----|---|---|----|-----|-----|------|-----|-----|----|-----|---|-----|------|
| Agree          | Female            | No, but I identify as an ally |  | White                                               | German, Polish, Irish, other | I do not have a disability | Upper-Middle Income | 0 | 1.5 | 1.5 | 2 | 2 | 0  | 0   | 0   | 0    | 2   | 1   | -1 | 2   |   |     | 0.5  |
| Agree          | Male, Transgender | Yes                           |  | East Asian (e.g., Chinese, Japanese, Korean)        | Chinese American             | I do not have a disability | Upper-Middle Income | 0 | 0.5 | 0.5 | 4 | 2 | -2 | 0.5 | 1   | 0.5  | 2   | 2   | 0  | 2   |   |     | -1   |
| Agree          | Male              | No                            |  | South Asian (e.g., Indian, Nepali, Pakistani)       | Indian                       | I do not have a disability | Middle Income       | 1 | 2   | 1   | 5 | 5 | 0  | 0   | 0   | 0    | 3   | 3   | 0  | 0.5 | 2 | 1.5 | 2.5  |
|                |                   |                               |  |                                                     |                              |                            |                     | 0 | 2   | 2   | 1 | 4 | 3  | 0   | 0.5 | 0.5  | 1.5 | 1.5 | 0  | 1.5 |   |     | 5.5  |
| Agree          | Female            | No                            |  | Hispanic, Latino, Latina, LatinX, or Spanish Origin | COLOMBIAN                    | I do not have a disability | Middle Income       | 0 | 0   | 0   | 2 | 1 | -1 | 0.5 | 0   | -0.5 | 1   | 2   | 1  | 1   |   |     | -0.5 |
| Strongly Agree | Male              | No, but I identify as an ally |  | Black, African, or African American                 | American                     | I do not have a disability | Upper-Middle Income | 0 | 1.5 | 1.5 | 4 | 1 | -3 | 0   | 1   | 1    | 3   | 3   | 0  | 2   |   |     | -0.5 |
| Agree          | Male              | No                            |  | Prefer not to say                                   | German, Swedish, Abyssal     | I do not have a disability | Upper-Middle Income | 0 | 0   | 0   | 7 | 2 | -5 | 0.5 | 0   | -0.5 | 2   | 2   | 0  | 2   |   |     | -5.5 |

|                       |            |                               |              |                                                                             |                            |                            |                     |     |     |      |   |   |    |     |     |     |   |   |    |   |  |   |      |
|-----------------------|------------|-------------------------------|--------------|-----------------------------------------------------------------------------|----------------------------|----------------------------|---------------------|-----|-----|------|---|---|----|-----|-----|-----|---|---|----|---|--|---|------|
| Agree                 | Female     | Yes                           |              | White                                                                       | White                      | I do not have a disability | Middle Income       | 1.5 | 1.5 | 0    | 0 | 7 | 7  | 0   | 0.5 | 0.5 | 2 | 2 | 0  | 2 |  |   | 7.5  |
| Strongly Agree        | Male       | No                            |              | Hispanic, Latino, Latina, LatinX, or Spanish Origin                         | Puerto Rican               | I do not have a disability | Lower-Middle Income | 0.5 | 1.5 | 1    | 2 | 3 | 1  | 0.5 | 0.5 | 0   | 2 | 2 | 0  | 2 |  |   | 2    |
| Strongly Agree        | Male       | No                            |              | Hispanic, Latino, Latina, LatinX, or Spanish Origin                         | Brasilian                  | Prefer not to say          | Middle Income       | 2   | 2   | 0    | 4 | 2 | -2 | 0   | 0.5 | 0.5 | 2 | 2 | 0  | 2 |  |   | -1.5 |
| Agree                 | Male       | No                            |              | White                                                                       | German/Irish American      | I have a disability        | Middle Income       | 2   | 2   | 0    | 0 | 0 | 0  | 0   | 0   | 0   | 3 | 3 | 0  | 1 |  |   | 0    |
| Agree                 | Female     | No, but I identify as an ally |              | White                                                                       | American                   | I do not have a disability | Middle Income       | 0   | 0   | 0    | 2 | 2 | 0  | 0.5 | 0.5 | 0   | 2 | 2 | 0  | 2 |  |   | 0    |
| Agree                 | Female     | No                            |              | White                                                                       | Polish, Ukrainian, Italian | I have a disability        | Lower-Middle Income |     |     |      |   |   |    |     |     |     |   |   |    |   |  | 0 |      |
| Strongly Agree, Agree | Male       | No                            |              | Hispanic, Latino, Latina, LatinX, or Spanish Origin                         | Cuban                      | I do not have a disability | Upper-Middle Income |     |     |      |   |   |    |     |     |     |   |   |    |   |  | 0 |      |
| Strongly Agree        | Non binary | Yes                           |              | White                                                                       | European American?         | Prefer not to say          | Upper-Middle Income | 1.5 | 3   | 1.5  | 0 | 2 | 2  | 0.5 | 1   | 0.5 | 2 | 2 | 0  | 2 |  |   | 4    |
| Strongly Agree        | Female     | Yes                           |              | Caribbean, Hispanic, Latino, Latina, LatinX, or Spanish Origin, Multiracial | Dominican and Guyanese     | I do not have a disability | Middle Income       | 0   | 0   | 0    | 0 | 0 | 0  | 0   | 0.5 | 0.5 | 3 | 2 | -1 | 2 |  |   | -0.5 |
| Strongly Agree        | Female     | No                            | heterosexual | White                                                                       | white                      | I do not have a disability | Middle Income       | 2.5 | 2   | -0.5 | 6 | 1 | -5 | 1   | 1   | 0   | 3 | 2 | -1 |   |  |   | -6.5 |

|                |                     |                               |  |                                                                                              |                                     |                            |                      |     |     |      |   |   |   |     |     |      |   |   |    |   |  |  |      |
|----------------|---------------------|-------------------------------|--|----------------------------------------------------------------------------------------------|-------------------------------------|----------------------------|----------------------|-----|-----|------|---|---|---|-----|-----|------|---|---|----|---|--|--|------|
| Agree          | Transgender         | Yes                           |  | White                                                                                        | American                            | I do not have a disability | Middle Income        | 1.5 | 2   | 0.5  | 2 | 2 | 0 | 0   | 0   | 0    | 3 | 2 | -1 | 2 |  |  | -0.5 |
| Disagree       | Female              | No, but I identify as an ally |  | White                                                                                        | American                            | I do not have a disability | Upper-Middle Income  |     |     |      | 0 |   |   |     |     |      |   |   |    |   |  |  | 0    |
| Strongly Agree | Prefer not to say   | Prefer not to say             |  | Prefer not to say                                                                            | Prefer not to say                   | Prefer not to say          | Prefer not to answer | 1.5 | 2   | 0.5  | 0 | 0 | 0 | 0   | 0.5 | 0.5  | 2 | 2 | 0  |   |  |  | 1    |
| Agree          | Female              | No, but I identify as an ally |  | South Asian (e.g., Indian, Nepali, Pakistani), East Asian (e.g., Chinese, Japanese, Korean)  | na                                  | I do not have a disability | Middle Income        | 2.5 | 2   | -0.5 | 2 | 6 | 4 | 0.5 | 0.5 | 0    | 2 | 2 | 0  |   |  |  | 3.5  |
| Agree          | Female              | No                            |  | White                                                                                        | German, Swedish, Scottish, English  | I do not have a disability | Upper-Middle Income  | 0.5 | 0.5 | 0    | 6 | 6 | 0 | 0   | 0   | 0    | 3 | 3 | 0  |   |  |  | 0    |
| Agree          | Female              | No, but I identify as an ally |  | White                                                                                        | White                               | I do not have a disability | Upper-Middle Income  | 1.5 | 1.5 | 0    | 4 | 4 | 0 | 0   | 1   | 1    | 3 | 0 | -3 | 2 |  |  | -2   |
| Strongly Agree | Non binary, Agender | Yes                           |  | White                                                                                        | Scottish                            | I do not have a disability | Middle Income        |     |     |      | 0 |   |   |     |     |      |   |   |    |   |  |  | 0    |
| Neutral        | Female              | Yes                           |  | American Indian or Alaska Native, Hispanic, Latino, Latina, LatinX, or Spanish Origin, White | European, Hopi, Portuguese, Spanish | I have a disability        | Upper-Middle Income  | 1   |     |      | 5 |   |   | 0   |     |      | 2 |   |    |   |  |  | 0    |
| Strongly Agree | Female              | Yes                           |  | Hispanic, Latino, Latina, LatinX, or Spanish Origin                                          | Mexican American                    | I do not have a disability | Lower Income         | 2.5 | 2.5 | 0    | 1 | 1 | 0 | 1   | 1   | 0    | 3 | 2 | -1 |   |  |  | -1   |
|                |                     |                               |  |                                                                                              |                                     |                            |                      | 0   |     |      | 3 |   |   | 0   |     |      | 3 |   |    |   |  |  | 0    |
|                |                     |                               |  |                                                                                              |                                     |                            |                      | 2   | 2.5 | 0.5  | 1 | 1 | 0 | 0   | 0.5 | 0.5  | 2 | 3 | 1  |   |  |  | 2    |
|                |                     |                               |  |                                                                                              |                                     |                            |                      | 2   | 2.5 | 0.5  | 0 | 0 | 0 | 1   | 0.5 | -0.5 | 2 | 2 | 0  | 2 |  |  | 0    |
|                |                     |                               |  |                                                                                              |                                     |                            |                      | 1   | 2   | 1    | 1 | 1 | 0 | 0   | 0   | 0    | 2 | 2 | 0  |   |  |  | 1    |
|                |                     |                               |  |                                                                                              |                                     |                            |                      | 2   | 1   | -1   | 1 | 1 | 0 | 0.5 | 0.5 | 0    | 3 | 3 | 0  |   |  |  | -1   |
|                |                     |                               |  |                                                                                              |                                     |                            |                      | 1.5 | 1.5 | 0    | 6 | 6 | 0 | 0   | 0   | 0    | 3 | 3 | 0  |   |  |  | 0    |

|                |                   |                               |  |                                                     |             |                            |                      |     |     |      |   |   |   |     |     |      |     |   |     |   |  |  |  |      |
|----------------|-------------------|-------------------------------|--|-----------------------------------------------------|-------------|----------------------------|----------------------|-----|-----|------|---|---|---|-----|-----|------|-----|---|-----|---|--|--|--|------|
|                |                   |                               |  |                                                     |             |                            |                      | 0   | 1   | 1    | 4 | 4 | 0 | 0.5 | 0.5 | 0    | 3   | 3 | 0   | 2 |  |  |  | 1    |
|                |                   |                               |  |                                                     |             |                            |                      | 2   | 1   | -1   | 2 | 6 | 4 | 0   | 0.5 | 0.5  | 2   | 2 | 0   |   |  |  |  | 3.5  |
| Strongly Agree | Male              | No, but I identify as an ally |  | Hispanic, Latino, Latina, LatinX, or Spanish Origin | Mexican     | I do not have a disability | Lower-Middle Income  |     |     |      |   |   |   |     |     |      |     |   |     |   |  |  |  |      |
|                |                   |                               |  |                                                     |             |                            |                      | 2.5 | 2.5 | 0    | 5 | 5 | 0 | 0.5 | 0   | -0.5 | 2   | 2 | 0   | 2 |  |  |  | -0.5 |
| Neutral        | Female, Cisgender | No                            |  | Black, African, or African American                 | I am Malian | I do not have a disability | Lower Income         | 1.5 | 1   | -0.5 | 6 | 6 | 0 | 0.5 | 0.5 | 0    | 2   | 3 | 1   |   |  |  |  | 0.5  |
| Strongly Agree | Prefer not to say | Prefer not to say             |  | Prefer not to say                                   | N/A         | Prefer not to say          | Prefer not to answer | 1.5 | 1.5 | 0    | 1 | 1 | 0 | 0   | 0   | 0    | 3   | 3 | 0   |   |  |  |  | 0    |
| Strongly Agree | Female            | No, but I identify as an ally |  | Hispanic, Latino, Latina, LatinX, or Spanish Origin | Guatemalan  | I do not have a disability | Upper-Middle Income  |     |     |      |   |   |   |     |     |      |     |   |     |   |  |  |  |      |
|                |                   |                               |  |                                                     |             |                            |                      | 0   | 0.5 | 0.5  | 5 | 7 | 2 | 0   | 0   | 0    | 2   | 2 | 0   |   |  |  |  | 2.5  |
| Agree          | Female            | No                            |  | Hispanic, Latino, Latina, LatinX, or Spanish Origin | Mexican     | I do not have a disability | Lower Income         | 2.5 | 2.5 | 0    | 0 | 1 | 1 | 0.5 | 0.5 | 0    | 0.5 | 2 | 1.5 |   |  |  |  | 2.5  |

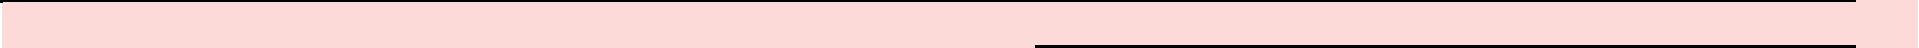

|                |                 |                               |  |                                     |                                                   |                            |                     |   |   |    |   |     |      |     |     |     |   |     |      |   |   |    |      |      |
|----------------|-----------------|-------------------------------|--|-------------------------------------|---------------------------------------------------|----------------------------|---------------------|---|---|----|---|-----|------|-----|-----|-----|---|-----|------|---|---|----|------|------|
| Strongly Agree | Female          | Yes                           |  | White                               | Polish                                            | I do not have a disability | Lower-Middle Income | 1 | 1 | 0  | 0 | 4   | 4    | 0.5 | 1   | 0.5 | 3 | 1   | -2   | 2 | 2 | 0  | 2.5  | 2.5  |
| Neutral        | Male, Cisgender | No                            |  | White                               | American                                          | I do not have a disability | Middle Income       | 0 | 0 | 0  | 0 | 2   | 2    | 0   | 0   | 0   | 1 | 1   | 0    | 1 | 1 | 0  | 2    | 2    |
| Strongly Agree | Male            | No                            |  | White                               | Italian and Irish                                 | I do not have a disability | Upper-Middle Income | 0 | 0 | 0  | 4 | 2.5 | -1.5 | 0.5 | 0.5 | 0   | 1 | 1   | 0    | 1 | 1 | 0  | -1.5 | -1.5 |
| Strongly Agree | Male            | No                            |  | White                               | I have no idea but probably some sort of European | I do not have a disability | Lower-Middle Income | 0 | 1 | 1  | 6 | 1.5 | -4.5 | 0.5 | 0.5 | 0   | 2 | 3   | 1    | 2 | 1 | -1 | -3.5 | -3.5 |
| Strongly Agree | Female          | Yes                           |  | White                               | French Canadian                                   | I have a disability        | Middle Income       | 0 | 0 | 0  | 1 | 3   | 2    | 0.5 | 1   | 0.5 | 1 | 2   | 1    | 1 | 1 | 0  | 3.5  | 3.5  |
| Agree          | Male            | No                            |  | Black, African, or African American | Gambian                                           | I do not have a disability | Lower-Middle Income | 1 | 0 | -1 | 2 | 1   | -1   | 0   | 0.5 | 0.5 | 2 | 1.5 | -0.5 | 0 | 2 | 2  | 0    | 0    |
| Neutral        | Female          | No                            |  | White                               | Dutch, German                                     | I do not have a disability | Upper-Middle Income | 2 | 0 | -2 | 3 | 0   | -3   | 0   | 0   | 0   | 0 | 0   | 0    | 2 | 2 | 0  | -5   | -5   |
| Agree          | Female          | No, but I identify as an ally |  | White                               | German and other things                           | I do not have a disability | Upper-Middle Income | 1 | 0 | -1 | 1 | 0   | -1   | 1   | 0   | -1  | 2 | 0   | -2   | 2 | 2 | 0  | -5   | -5   |
| Agree          | Male            | No, but I identify as an ally |  | White                               | Irish                                             | I do not have a disability | Middle Income       | 1 | 1 | 0  | 2 | 2   | 0    | 0   | 0.5 | 0.5 | 2 | 2   | 0    | 1 | 1 | 0  | 0.5  | 0.5  |

|                |        |                               |                                                                                                        |                                                |                            |                     |     |     |      |   |     |     |     |     |      |   |   |    |   |   |    |      |      |
|----------------|--------|-------------------------------|--------------------------------------------------------------------------------------------------------|------------------------------------------------|----------------------------|---------------------|-----|-----|------|---|-----|-----|-----|-----|------|---|---|----|---|---|----|------|------|
| Strongly Agree | Male   | No, but I identify as an ally | White                                                                                                  | American                                       | I do not have a disability | Middle Income       | 0.5 | 0   | -0.5 | 0 | 0   | 0   | 0   | 0   | 0    | 2 | 0 | -2 | 2 | 1 | -1 | -3.5 | -3.5 |
| Agree          | Male   | Prefer not to say             | Prefer not to say                                                                                      | Human being                                    | I do not have a disability | Middle Income       | 0   | 0   | 0    | 0 | 0   | 0   | 0.5 | 0   | -0.5 | 3 | 0 | -3 | 2 | 2 | 0  | -3.5 | -3.5 |
| Strongly Agree | Male   | No                            | South Asian (e.g., Indian, Nepali, Pakistani)                                                          | Bangladeshi                                    | I do not have a disability | Lower-Middle Income | 0   | 0   | 0    | 1 | 0   | -1  | 0.5 | 0.5 | 0    | 2 | 2 | 0  | 2 | 2 | 0  | -1   | -1   |
| Strongly Agree | Female | No, but I identify as an ally | White                                                                                                  | Irish, Scottish, German, English, Polish, etc. | I do not have a disability | Middle Income       |     | 2   |      | 5 | 4   | -1  |     | 0   |      | 2 |   |    | 1 |   |    | -1   |      |
| Agree          | Female | No, but I identify as an ally | Native Hawaiian or Pacific Islander, South Asian (e.g., Indian, Nepali, Pakistani), Multiracial, White | Filipino, Indian, white                        | I do not have a disability | Upper-Middle Income | 0   | 0   | 0    | 2 | 2   | 0   | 0   | 0   | 0    | 2 | 2 | 0  | 1 | 1 | 0  | 0    | 0    |
| Strongly Agree | Female | No                            | White                                                                                                  | Caucasian                                      | I do not have a disability | Middle Income       | 2   | 2.5 | 0.5  | 7 | 5   | -2  | 1   | 1   | 0    | 2 | 2 | 0  | 1 | 1 | 0  | -1.5 | -1.5 |
| Agree          | Female | No                            | White                                                                                                  | American                                       | I do not have a disability | Upper-Middle Income | 1   | 1   | 0    | 3 | 1   | -2  | 0.5 | 0   | -0.5 | 2 | 2 | 0  | 2 | 1 | -1 | -3.5 | -3.5 |
| Agree          | Male   | Yes                           | White                                                                                                  | American                                       | I do not have a disability | Lower-Middle Income | 2   | 1   | -1   | 6 | 1   | -5  | 0.5 | 1   | 0.5  | 2 | 2 | 0  | 2 | 1 | -1 | -6.5 | -6.5 |
| Strongly Agree | Female | No, but I identify as an ally | White                                                                                                  | German, French, English, Polish                | I do not have a disability | Upper-Middle Income | 0   | 0   | 0    | 6 | 6   | 0   | 0.5 | 0.5 | 0    | 2 | 2 | 0  | 2 | 2 | 0  | 0    | 0    |
| Strongly Agree | Female | No, but I identify as an ally | Hispanic, Latino, Latina, LatinX, or Spanish Origin, White                                             | Hispanic white, Irish                          | I do not have a disability | Lower-Middle Income |     | 0   | 0    | 3 | 3   | 0   |     | 0.5 | 0.5  |   | 3 | 3  |   | 1 | 1  | 4.5  | 4.5  |
| Strongly Agree | Female | Yes                           | White                                                                                                  | Caucasian                                      | I do not have a disability | Upper-Middle Income | 1   |     |      | 3 |     |     | 1   |     |      | 2 |   |    |   |   |    | 0    |      |
| Strongly Agree | Female | Yes                           | American Indian or Alaska Native, Black, African, or African American, Multiracial, White              | Puerto Rican, Cherokee/Comanches               | I have a disability        | Lower-Middle Income | 1   | 2   | 1    | 1 | 2.5 | 1.5 | 0.5 | 0   | -0.5 | 2 | 1 | -1 | 1 | 1 | 0  | 1    | 1    |

|                |                   |                               |                                                     |                        |                            |                            |                     |     |      |   |   |    |     |     |      |     |     |      |   |   |    |      |      |
|----------------|-------------------|-------------------------------|-----------------------------------------------------|------------------------|----------------------------|----------------------------|---------------------|-----|------|---|---|----|-----|-----|------|-----|-----|------|---|---|----|------|------|
| Strongly Agree | Female            | Yes                           | Black, African, or African American, Caribbean      | Haitian american       | I do not have a disability | Lower-Middle Income        | 1                   | 1   | 0    |   |   | 0  | 0   | 1   | 1    | 2   | 2   | 0    | 2 | 1 | -1 | 0    |      |
| Strongly Agree | Female            | No                            | Caribbean                                           | bahamian               | I do not have a disability | Lower Income               |                     |     |      |   |   |    |     |     |      |     |     |      |   |   |    | 0    | 0    |
| Agree          | Non binary        | Yes                           | White                                               | Irish American         | I have a disability        | Lower-Middle Income        |                     |     |      |   |   |    |     |     |      |     |     |      |   |   |    | 0    | 0    |
| Agree          | Prefer not to say | Prefer not to say             | Prefer not to say                                   | Prefer not to say      | Prefer not to say          | Prefer not to answer       |                     |     |      |   |   |    |     |     |      |     |     |      |   |   |    | 0    | 0    |
| Agree          | Female            | No                            | Black, African, or African American                 | Black                  | I do not have a disability | Lower-Middle Income        | 0                   | 0   | 0    | 0 | 0 | 0  | 1   | 1   | 0    | 1.5 | 1.5 | 0    | 2 | 2 | 0  | 0    | 0    |
| Agree          | Male              | No, but I identify as an ally | White                                               | Canadian               | Prefer not to say          | Middle Income              | 0                   | 1.5 | 1.5  | 0 | 0 | 0  | 0.5 | 0.5 | 0    | 2   | 2   | 0    | 0 | 2 | 2  | 3.5  | 3.5  |
| Strongly Agree | Female            | No                            | White                                               | American               | I do not have a disability | Lower-Middle Income        | 2.5                 | 3   | 0.5  | 4 | 7 | 3  | 0   | 0.5 | 0.5  | 2   | 2   | 0    | 1 | 1 | 0  | 4    | 4    |
| Agree          | Female            | No                            | White                                               | American               | I do not have a disability | Lower-Middle Income        | 0                   | 0   | 0    |   | 4 |    | 0   | 0   | 0    | 2   | 2   | 0    | 2 | 2 | 0  | 0    |      |
| Agree          | Female            | No, but I identify as an ally | White                                               | European American      | I have a disability        | Upper-Middle Income        | 1.5                 | 2   | 0.5  | 5 | 2 | -3 | 0   | 0.5 | 0.5  | 2   | 1.5 | -0.5 | 1 | 1 | 0  | -2.5 | -2.5 |
| Agree          | Male              | No                            | East Asian (e.g., Chinese, Japanese, Korean), White | american               | I do not have a disability | Middle Income              | 1                   | 1   | 0    | 0 | 1 | 1  | 0   | 0   | 0    | 1   | 1   | 0    | 1 | 2 | 1  | 2    | 2    |
| Agree          | Female            | Prefer not to say             | Multiracial                                         | Irish Chinese American | I have a disability        | Middle Income              | 1.5                 | 1   | -0.5 | 4 | 1 | -3 | 1   | 0.5 | -0.5 | 2   | 2   | 0    | 1 | 1 | 0  | -4   | -4   |
| Neutral        | Female            | No                            | Paige                                               | White                  | German, Irish American     | I do not have a disability | Lower-Middle Income | 0   | 0    | 0 | 0 | 0  | 0   | 0.5 | 0.5  | 2   | 2   | 0    | 2 | 2 | 0  | 0.5  | 0.5  |
|                |                   |                               |                                                     |                        |                            |                            | 1                   | 0   | -1   | 0 | 0 | 0  | 0   | 0.5 | 0.5  | 1   | 2   | 1    | 1 | 1 | 0  | 0.5  | 0.5  |
|                |                   |                               |                                                     |                        |                            |                            | 2                   | 2   | 0    | 5 | 1 | -4 | 1   | 0.5 | -0.5 | 3   | 1   | -2   | 1 | 1 | 0  | -6.5 | -6.5 |
|                |                   |                               |                                                     |                        |                            |                            | 0                   | 0   | 0    |   |   |    | 0.5 | 1   | 0.5  | 3   | 3   | 0    | 2 | 1 | -1 | -0.5 |      |
|                |                   |                               |                                                     |                        |                            |                            | 0                   | 0   | 0    | 0 | 0 | 0  | 1   | 1   | 0    | 1.5 | 1.5 | 0    | 2 | 2 | 0  | 0    | 0    |
|                |                   |                               |                                                     |                        |                            |                            | 0                   | 0   | 0    |   |   |    | 0   | 0   | 0    | 3   | 2   | -1   | 1 | 1 | 0  | -1   |      |
|                |                   |                               |                                                     |                        |                            |                            | 2                   | 0   | -2   | 7 | 4 | -3 | 0   | 0.5 | 0.5  | 2   | 2   | 0    | 1 | 1 | 0  | -4.5 | -4.5 |

|                |                    |                               |      |                                                                       |                                                                                            |                            |                                                                                                            |     |     |      |   |   |    |     |     |      |   |   |   |   |   |    |      |      |
|----------------|--------------------|-------------------------------|------|-----------------------------------------------------------------------|--------------------------------------------------------------------------------------------|----------------------------|------------------------------------------------------------------------------------------------------------|-----|-----|------|---|---|----|-----|-----|------|---|---|---|---|---|----|------|------|
| Agree          | Male               | Yes                           |      | White                                                                 | American                                                                                   | I do not have a disability | Lower-Middle Income                                                                                        | 0   | 0   | 0    | 1 | 4 | 3  | 0.5 | 0.5 | 0    | 2 | 2 | 0 | 1 | 1 | 0  | 3    | 3    |
| Strongly Agree | Female             | No, but I identify as an ally |      | White                                                                 | Mixed Eastern European                                                                     | I do not have a disability | Middle Income                                                                                              | 0   | 0   | 0    | 1 | 3 | 2  | 0.5 | 1   | 0.5  | 1 | 2 | 1 | 2 | 2 | 0  | 3.5  | 3.5  |
| Strongly Agree | Male               | No                            |      | White                                                                 | American                                                                                   | I do not have a disability | Lower-Middle Income                                                                                        | 0   | 0   | 0    | 5 | 3 | -2 | 0.5 | 0.5 | 0    | 1 | 1 | 0 | 2 | 2 | 0  | -2   | -2   |
| Agree          | Female             | No                            |      | White                                                                 | Irish, German, Swedish, etc.                                                               | I do not have a disability | Prefer not to answer                                                                                       | 0   | 0   | 0    | 1 | 5 | 4  | 0.5 | 1   | 0.5  | 2 | 2 | 0 | 2 | 1 | -1 | 3.5  | 3.5  |
| Agree          | Female, Non binary | Yes                           |      | Southeast Asian (e.g., Cambodian, Indonesian, Thai, Malaysian), White | Filipino, American                                                                         | I have a disability        | Upper-Middle Income                                                                                        | 1.5 | 1   | -0.5 | 6 | 7 | 1  | 0.5 | 1   | 0.5  | 2 | 2 | 0 | 2 | 2 | 0  | 1    | 1    |
|                |                    |                               |      |                                                                       |                                                                                            |                            |                                                                                                            | 1.5 | 1.5 | 0    | 5 | 5 | 0  | 0.5 | 0   | -0.5 | 3 | 3 | 0 | 1 | 1 | 0  | -0.5 | -0.5 |
| Strongly Agree | Female             | No                            |      | White                                                                 | White                                                                                      | I do not have a disability | Lower-Middle Income                                                                                        | 1.5 | 1.5 | 0    | 5 | 5 | 0  | 0.5 | 0   | -0.5 | 3 | 3 | 0 | 1 | 1 | 0  | -0.5 | -0.5 |
| Strongly Agree | Female             | No                            |      | White                                                                 | German, English, Polish, Welsh, mostly Northwest European with very slight Native American | I do not have a disability | Since my dad passed away when I was eleven my family has moved from upper-middle to middle to lower-middle | 0   | 2   | 2    | 4 | 4 | 0  | 0.5 | 1   | 0.5  | 1 | 1 | 0 | 2 | 0 | -2 | 0.5  | 0.5  |
| Strongly Agree | Female             | Yes                           |      | White                                                                 | White                                                                                      | I do not have a disability | Lower Income                                                                                               | 0   | 1   | 1    | 0 | 2 | 2  | 0.5 | 1   | 0.5  | 1 | 2 | 1 | 1 | 1 | 0  | 4.5  | 4.5  |
| Strongly Agree | Female, Non binary | Yes                           |      | Middle Eastern or North African, White                                | White Middle-Eastern                                                                       | I do not have a disability | Middle Income                                                                                              | 0   | 0.5 | 0.5  | 3 | 4 | 1  | 0.5 | 0.5 | 0    | 2 | 2 | 0 | 2 | 1 | -1 | 0.5  | 0.5  |
| Agree          | Female             | Yes                           |      | White                                                                 | British                                                                                    | I do not have a disability | Middle Income                                                                                              |     |     |      |   |   |    |     |     |      |   |   |   |   |   |    |      |      |
| Agree          | Male               | No, but I identify as an ally | n/a  | White                                                                 | Polish, German, English, Irish                                                             | I have a disability        | Lower-Middle Income                                                                                        | 1   | 1   | 0    | 6 | 0 | -6 | 0.5 | 0.5 | 0    | 2 | 3 | 1 | 0 | 2 | 2  | -3   | -3   |
| Agree          | Female             | No                            | none | East Asian (e.g., Chinese, Japanese, Korean)                          | Chinese                                                                                    | I do not have a disability | Upper-Middle Income                                                                                        |     |     |      |   |   |    |     |     |      |   |   |   |   |   |    |      |      |



|                |             |                               |                 |                                                                 |                                                                                                                                        |                            |                     |   |     |      |   |   |    |   |     |      |   |   |   |     |   |      |      |      |
|----------------|-------------|-------------------------------|-----------------|-----------------------------------------------------------------|----------------------------------------------------------------------------------------------------------------------------------------|----------------------------|---------------------|---|-----|------|---|---|----|---|-----|------|---|---|---|-----|---|------|------|------|
| Strongly Agree | Male        | No, but I identify as an ally | N/A             | White                                                           | American                                                                                                                               | I do not have a disability | Middle Income       | 1 | 1   | 0    | 8 | 2 | -6 | 1 | 1   | 0    | 2 | 2 | 0 | 1.5 | 1 | -0.5 | -6.5 | -6.5 |
| Strongly Agree | Female      | No, but I identify as an ally | N/A             | White                                                           | American                                                                                                                               | I do not have a disability | Middle Income       | 3 | 2.5 | -0.5 | 6 | 5 | -1 | 1 | 1   | 0    | 2 | 2 | 0 | 2   | 2 | 0    | -1.5 | -1.5 |
| Strongly Agree | Female      | No                            | No Response     | White                                                           | White                                                                                                                                  | I do not have a disability | Middle Income       | 2 | 1   | -1   | 6 | 8 | 2  | 1 | 1   | 0    | 2 | 3 | 1 | 2   | 2 | 0    | 2    | 2    |
| Strongly Agree | Female      | Prefer not to say             | NA              | Multiracial,White                                               | Prefer not to say                                                                                                                      | I do not have a disability | High Income         | 3 | 1   | -2   | 7 | 6 | -1 | 1 | 0.5 | -0.5 | 2 | 3 | 1 | 2   | 2 | 0    | -2.5 | -2.5 |
| Strongly Agree | Male        | Yes                           | No Response     | Southeast Asian (e.g., Cambodian, Indonesian, Thai, Malaysian)) | Vietnamese                                                                                                                             | I do not have a disability | Lower Income        |   |     |      |   |   |    |   |     |      |   |   |   |     |   |      |      |      |
| Strongly Agree | Male        | No                            | NA              | Black, African, or African American, Multi racial, White        | I am half nigerian half white                                                                                                          | I do not have a disability | Lower Income        |   |     |      |   |   |    |   |     |      |   |   |   |     |   |      |      |      |
| Agree          | Female      | Yes                           | N/A             | White                                                           | I'm mainly of German, Spanish, and Irish heritage, but I think the white mixing pot of my ancestry can best be described as "American" | Prefer not to say          | Middle Income       |   |     |      |   |   |    |   |     |      |   |   |   |     |   |      |      |      |
| Neutral        | Female      | No, but I identify as an ally | No Response     | Hispanic, Latino, Latina, LatinX, or Spanish Origin             | Mexican                                                                                                                                | I do not have a disability | Lower Income        | 2 | 1   | -1   | 3 | 6 | 3  | 1 | 1   | 0    | 2 | 3 | 1 | 2   | 2 | 0    | 3    | 3    |
| Strongly Agree | Male        | No                            | n/a             | Hispanic, Latino, Latina, LatinX, or Spanish Origin, White      | Mexican                                                                                                                                | I have a disability        | High Income         | 1 | 0.5 | -0.5 | 7 | 6 | -1 | 1 | 0.5 | -0.5 | 2 | 2 | 0 | 2   | 2 | 0    | -2   | -2   |
| Agree          | Female      | No                            | Straight female | White                                                           | White                                                                                                                                  | I do not have a disability | Upper-Middle Income | 1 | 1.5 | 0.5  | 3 | 1 | -2 | 1 | 1   | 0    | 2 | 2 | 0 | 2   | 2 | 0    | -1.5 | -1.5 |
| Strongly Agree | Male        | No                            | N/A             | White                                                           | German, Swedish, Polish                                                                                                                | I do not have a disability | Middle Income       | 1 | 1   | 0    | 1 | 4 | 3  | 1 | 1   | 0    | 1 | 2 | 1 | 1   | 2 | 1    | 5    | 5    |
| Strongly Agree | Male        | No                            | No Response     | East Asian (e.g., Chinese, Japanese, Korean), White             | Korean                                                                                                                                 | I do not have a disability | High Income         | 2 | 1   | -1   | 6 | 2 | -4 | 1 | 1   | 0    | 2 | 3 | 1 | 2   | 2 | 0    | -4   | -4   |
| Strongly Agree | No Response | No Response                   | No Response     | No Response                                                     | No Response                                                                                                                            | No Response                | No Response         | 2 | 2.5 | 0.5  | 8 | 7 | -1 | 1 | 1   | 0    | 2 | 2 | 0 | 2   | 2 | 0    | -0.5 | -0.5 |

|                |                |                               |                                           |                                                         |                                |                            |                      |   |   |    |   |   |   |     |      |      |   |   |    |     |     |      |     |     |
|----------------|----------------|-------------------------------|-------------------------------------------|---------------------------------------------------------|--------------------------------|----------------------------|----------------------|---|---|----|---|---|---|-----|------|------|---|---|----|-----|-----|------|-----|-----|
| Agree,Neutral  | Genderqueer    | Yes                           | Not applicable.                           | White                                                   | American                       | I do not have a disability | High Income          | 2 | 2 | 0  | 5 | 7 | 2 | 1   | 1    | 0    | 2 | 3 | 1  | 2   | 2   | 0    | 3   | 3   |
| Agree          | Female         | No, but I identify as an ally | Answered in the above questions.          | White                                                   | Armenian and German - American | I do not have a disability | Lower-Middle Income  | 2 | 2 | 0  | 2 | 2 | 0 | 1   | 0.5  | -0.5 | 2 | 3 | 1  | 2   | 2   | 0    | 0.5 | 0.5 |
| Agree          | Male           | No                            | No Response                               | Prefer not to say                                       | No Response                    | I do not have a disability | Prefer not to answer |   |   |    |   |   |   |     |      |      |   |   |    |     |     |      |     |     |
| Agree          | Male,Cisgender | No, but I identify as an ally | No Response                               | White                                                   | Czech                          | I do not have a disability | Middle Income        | 1 | 1 | 0  | 3 | 4 | 1 | 1   | 1    | 0    | 2 | 3 | 1  | 2   | 1   | -1   | 1   | 1   |
| Strongly Agree | Male           | No, but I identify as an ally | 19 yr old white male from Austin suburbs. | Hispanic, Latino,Latina, LatinX,or Spanish Origin,White | German, Irish, Cuban, Mexican  | I do not have a disability | Lower-Middle Income  | 3 | 2 | -1 | 8 | 8 | 1 | 1   | 1    | 0    | 2 | 3 | 1  | 2   | 2   | 0    | 0   | 0   |
| Agree          | Female         | Yes                           | N/A                                       | South Asian (e.g.,Indian, Nepali, Pakistani)            | Maharashtrian                  | I do not have a disability | Upper-Middle Income  | 2 | 1 | -1 | 7 | 6 | 1 | 1   | 1    | 0    | 3 | 2 | -1 | 2   | 2   | 0    | -3  | -3  |
| Strongly Agree | Female         | No, but I identify as an ally | No Response                               | White                                                   | Polish, English, Irish         | I do not have a disability | Upper-Middle Income  | 2 | 2 | 0  | 3 | 1 | 1 | 1   | 1    | 0    | 2 | 2 | 0  | 1.5 | 1.5 | 0    | -2  | -2  |
| Agree          | Female         | No, but I identify as an ally | No Response                               | Hispanic, Latino,Latina, LatinX,or Spanish Origin       | Mexican                        | I do not have a disability | Lower Income         | 3 | 1 | -2 | 2 | 0 | 1 | 0.5 | -0.5 | -0.5 | 3 | 2 | -1 | 1   | 1.5 | 0.5  | -5  | -5  |
| Agree          | Female         | No, but I identify as an ally | N/A                                       | White                                                   | German                         | I do not have a disability | Lower Income         | 1 | 1 | 0  | 0 | 2 | 2 | 1   | 0.5  | -0.5 | 2 | 2 | 0  | 1   | 1   | 0    | 1.5 | 1.5 |
| Strongly Agree | Male           | No                            | No Response                               | Black, African, or African American                     | African American               | I do not have a disability | Lower Income         |   |   |    |   |   |   |     |      | 0    |   |   | 1  |     |     | -0.5 |     |     |
| Strongly Agree | Male           | No                            | No Response                               | North Asian (e.g., Russian),White                       | Russian+Azerbaijani            | I do not have a disability | High Income          | 2 | 2 | 0  | 3 | 1 | 2 | 1   | 1    | 0    | 3 | 3 | 0  | 1   | 1   | 0    | -2  | -2  |

|                       |                   |                               |                          |                                                                                                       |                                                                                           |                            |                     |   |   |    |   |   |    |     |     |      |   |   |   |     |      |      |
|-----------------------|-------------------|-------------------------------|--------------------------|-------------------------------------------------------------------------------------------------------|-------------------------------------------------------------------------------------------|----------------------------|---------------------|---|---|----|---|---|----|-----|-----|------|---|---|---|-----|------|------|
| Strongly Agree        | Male              | No                            | Heterosexual male        | North Asian (e.g., Russian),East Asian (e.g., Chinese, Japanese, Korean),Multiracial,White            | Half Russian/Turkish and half Japanese. Born in America.                                  | I do not have a disability | Upper-Middle Income | 2 | 1 | -1 | 4 | 3 | -1 | 1   | 0.5 | -0.5 | 2 | 2 | 0 | 1.5 | -1   | -1   |
| Agree                 | Male              | Yes                           | -                        | Hispanic, Latino, Latina, LatinX, or Spanish Origin                                                   | Mexican American                                                                          | Prefer not to say          | Middle Income       |   |   |    |   |   |    |     |     |      |   |   |   |     |      |      |
| Strongly Agree        | No Response       |                               |                          |                                                                                                       |                                                                                           |                            |                     |   |   |    |   |   |    |     |     |      |   |   |   |     |      |      |
| Strongly Agree, Agree | Male              | Yes                           | Captured fairly well.    | American Indian or Alaska Native,Hispanic Latino, Latina, LatinX, or Spanish Origin,Multiracial,White | Mexican.                                                                                  | I do not have a disability | Lower Income        | 1 | 1 | 0  | 0 | 5 | 5  | 1   | 0.5 | -0.5 | 2 | 3 | 1 | 2   | 6.5  | 6.5  |
| Strongly Agree        | Female            | No, but I identify as an ally | No Response              | White                                                                                                 | My family immigrated from Germany but I'm not really sure if that counts as an ethnicity. | Prefer not to say          | Upper-Middle Income | 1 | 1 | 0  | 2 | 4 | 2  | 1   | 1   | 0    | 2 | 2 | 0 | 1.5 | 2.5  | 2.5  |
| Agree                 | No Response       |                               |                          |                                                                                                       |                                                                                           |                            |                     |   |   |    |   |   |    |     |     |      |   |   |   |     |      |      |
| Strongly Agree        | Female, Cisgender | Yes                           | Bisexual cisgender woman | Middle Eastern or North African,White                                                                 | Norther European (e.g. German, Irish, etc.) and Syrian                                    | I do not have a disability | Upper-Middle Income | 2 | 2 | 0  | 6 | 8 | 2  | 1   | 1   | 0    | 2 | 3 | 1 | 0   | 3    | 3    |
| Strongly Agree        | Male              | No                            | N/A                      | Hispanic, Latino, Latina, LatinX, or Spanish Origin                                                   | Mexican.                                                                                  | I do not have a disability | Middle Income       | 2 | 3 | 1  | 4 | 2 | -2 | 1   | 0.5 | -0.5 | 2 | 2 | 0 | 2   | -1.5 | -1.5 |
| Agree                 | Male              | No                            | N/A                      | East Asian (e.g., Chinese, Japanese, Korean)                                                          | Chinese/Taiwanese                                                                         | I do not have a disability | Middle Income       | 1 | 3 | 2  | 8 | 7 | -1 | 1   | 1   | 0    | 3 | 3 | 0 | 2   | 1    | 1    |
| Strongly Agree        | Male              | No, but I identify as an ally | Was captured above       | White                                                                                                 | Dutch + English                                                                           | I do not have a disability | Middle Income       | 1 | 1 | 0  | 5 | 4 | -1 | 1   | 1   | 0    | 3 | 3 | 0 | 2   | -2   | -2   |
| Strongly Agree        | Female            | Yes                           | N/A                      | White                                                                                                 | White American.                                                                           | I have a disability        | Upper-Middle Income | 3 | 1 | -2 | 6 | 3 | -3 | 0.5 | 1   | 0.5  | 2 | 2 | 0 | 2   | -5.5 | -5.5 |
| Strongly Agree        | Female            | No, but I identify as an ally | N/A                      | White                                                                                                 | White                                                                                     | I have a disability        | Upper-Middle Income | 0 | 2 | 2  | 1 | 3 | 2  | 0.5 | 0.5 | 0    | 2 | 2 | 0 | 1   | 5    | 5    |

|                |             |                               |                                       |                                                            |                                                                                                                                                                   |                            |                     |   |   |    |   |     |     |     |     |      |   |   |    |   |      |      |      |    |
|----------------|-------------|-------------------------------|---------------------------------------|------------------------------------------------------------|-------------------------------------------------------------------------------------------------------------------------------------------------------------------|----------------------------|---------------------|---|---|----|---|-----|-----|-----|-----|------|---|---|----|---|------|------|------|----|
| Strongly Agree |             |                               |                                       |                                                            |                                                                                                                                                                   |                            |                     |   |   | -1 |   |     | -1  |     |     | -1   |   | 0 |    |   | -1   |      |      |    |
|                | No Response | No Response                   | No Response                           | No Response                                                | No Response                                                                                                                                                       | No Response                | No Response         | 3 | 2 |    | 2 | 1   |     | 1   | 0   |      | 2 | 2 |    | 2 | 1    |      | -4   | -4 |
| Agree          | Female      | Yes                           | No Response                           | White                                                      | No Response                                                                                                                                                       | I do not have a disability | Middle Income       |   |   | 0  |   |     | -2  |     |     | 0    |   |   | -1 |   | -0.5 | -3.5 | -3.5 |    |
| Agree          | Female      | No, but I identify as an ally | No Response                           | White                                                      | Hungarian                                                                                                                                                         | I do not have a disability | Upper-Middle Income |   |   | 1  |   |     | 0   |     |     | 0    |   |   | 1  |   | 0    | 2    | 2    |    |
| Strongly Agree | Female      | Yes                           | Answered above                        | White                                                      | Russian and French Canadian                                                                                                                                       | I have a disability        | Upper-Middle Income |   |   | -1 |   |     | -1  |     |     | 1    |   |   | 1  |   | 0    | 0    | 0    |    |
| Agree          | Male        | No, but I identify as an ally | It's captured by the questions above. | Hispanic, Latino, Latina, LatinX, or Spanish Origin        | Mexican                                                                                                                                                           | Prefer not to say          | Lower-Middle Income |   |   | -1 |   |     | -3  |     |     | 0    |   |   | 0  |   | 0    | -4   | -4   |    |
| Strongly Agree | Male        | No, but I identify as an ally | N/A                                   | Black, African, or African American                        | N/A                                                                                                                                                               | I do not have a disability | Middle Income       |   |   | 0  |   |     | -2  |     |     | 0    |   |   | 0  |   | -0.5 | -2.5 | -2.5 |    |
| Strongly Agree | Male        | No, but I identify as an ally | No Response                           | White                                                      | German                                                                                                                                                            | No Answer Given            | Upper-Middle Income |   |   | -1 |   |     | -2  | 0.5 | 0.5 | 0    |   | 1 | 2  | 1 | -0.5 | -2.5 | -2.5 |    |
| Strongly Agree | Male        | No                            | N/A                                   | White                                                      | I don't know how else to say this, but just American. If you are looking for the genetics and race of my ancestors then Irish & Italian.                          | I do not have a disability | Middle Income       |   |   | -1 |   |     | 3   |     |     | 0    |   |   | 0  |   | -0.5 | 1.5  | 1.5  |    |
| Agree          | Female      | No, but I identify as an ally | captured by questions above           | Hispanic, Latino, Latina, LatinX, or Spanish Origin, White | I am half white (with most family on that side originating from Sweden) and half Hispanic (with most family on that side originating from both Spain and Mexico). | I do not have a disability | Upper-Middle Income |   |   | 0  |   |     | 0   |     |     | -1   |   |   | 0  |   | 0    | -1   | -1   |    |
| Agree          | Female      | Yes                           | null                                  | American Indian or Alaska Native, White                    | Native American (specifically Citizen of Potawatomi Nation) and white (Dutch and German)                                                                          | I do not have a disability | Lower-Middle Income |   |   | 0  |   | 7.5 | 0.5 |     | 1   | 0    |   | 2 | 2  |   | -0.5 | 0    | 0    |    |
| Agree          | Male        | No                            | N/A                                   | East Asian (e.g., Chinese, Japanese, Korean)               | Korean                                                                                                                                                            | I do not have a disability | Middle Income       |   |   | 0  |   |     | -4  |     |     | -0.5 |   |   | 0  |   | 0    | -4.5 | -4.5 |    |
| Agree          | Female      | No, but I identify as an ally | N/A                                   | White                                                      | czech                                                                                                                                                             | I do not have a disability | Middle Income       |   |   | 0  |   |     | 0   |     |     | 0    |   |   | 1  |   | 1    | 2    | 2    |    |

|                |            |                                   |                                                                                                                        |                                                                 |                                                                                                                                      |                            |                            |                     |     |      |    |   |     |     |      |   |   |   |     |   |      |      |      |    |
|----------------|------------|-----------------------------------|------------------------------------------------------------------------------------------------------------------------|-----------------------------------------------------------------|--------------------------------------------------------------------------------------------------------------------------------------|----------------------------|----------------------------|---------------------|-----|------|----|---|-----|-----|------|---|---|---|-----|---|------|------|------|----|
| Strongly Agree | Male       | Other (see freeform answer below) | I do not identify as a member of the LGBT community. I don't know what ally is/means. (haven't heard this before)      | Hispanic, Latino, Latina, LatinX, or Spanish Origin,White       | Three of my grandparents are white (mix-mosh of lots of European countries) and my fourth grandparent is an immigrant from Honduras. | I do not have a disability | Upper-Middle Income        | 1                   | 1   | 0    | 6  | 7 | 1   | 1   | 0    | 3 | 3 | 0 | 2   | 2 | 0    | 1    | 1    |    |
| Agree          |            | Female                            | No                                                                                                                     | Female                                                          | Middle Eastern or North African                                                                                                      | Middle Eastern             | I do not have a disability | Upper-Middle Income | 3   | 3    | 0  | 6 | 2   | -4  | 1    | 1 | 0 | 2 | 2   | 0 | 2    | 2    | -4   | -4 |
| Agree          |            | Transgender                       | Yes                                                                                                                    | N/A                                                             | Southeast Asian (e.g., Cambodian, Indonesian, Thai, Malaysian))                                                                      | Filipino                   | I do not have a disability | Lower-Middle Income | 2   | 3    | 1  | 6 | 6   | 0   | 1    | 1 | 0 | 2 | 2   | 0 | 1    | 1    | 1    | 1  |
| Strongly Agree |            | Male                              | No, but I identify as an ally                                                                                          | No Response                                                     | White                                                                                                                                | No Response                | Prefer not to say          | Middle Income       | 2   | 1    | -1 | 5 | 2   | -3  | 0    | 1 | 1 | 2 | 3   | 1 | 1    | 2    | -1   | -1 |
| Agree          | Male       | No                                | N/A                                                                                                                    | Hispanic, Latino, Latina, LatinX, or Spanish Origin,White       | Canadian, Mexican,American                                                                                                           | I do not have a disability | Middle Income              | 1                   | 2   | 1    | 4  | 5 | 1   | 0.5 | -0.5 | 2 | 3 | 1 | 1.5 | 1 | -0.5 | 2    | 2    |    |
| Agree          | Male       | No                                | No Response                                                                                                            | Hispanic Latino, Latina, LatinX,, or Spanish Origin,White       | Mexican American                                                                                                                     | I do not have a disability | Lower Income               | 1                   | 1   | 0    | 0  | 4 | 0.5 | 0.5 | 0    | 2 | 2 | 0 | 2   | 2 | 0    | 4    | 4    |    |
| Agree          | Non binary | Yes                               | I am just queer, but I identified as a lesbian and bisexual in the past. (separately and at different times,of course) | White                                                           | Italian American                                                                                                                     | Prefer not to say          | Lower Income               | 3                   | 2.5 | -0.5 | 6  | 6 | 0   | 0.5 | 0.5  | 0 | 2 | 0 | -2  | 1 | 2    | -1.5 | -1.5 |    |
| Strongly Agree | Male       | Yes                               | n/a                                                                                                                    | Southeast Asian (e.g., Cambodian, Indonesian, Thai, Malaysian)) | Multiracial,White                                                                                                                    | Vietnamese,Swedish         | I do not have a disability | Upper-Middle Income | 1   | 1    | 0  | 7 | 6   | 1   | 1    | 0 | 3 | 3 | 0   | 2 | 2    | 0    | -1   | -1 |

|                       |                   |                               |             |                                                                    |                        |                            |                     |     |     |      |   |   |    |     |     |     |   |     |      |   |     |      |      |      |
|-----------------------|-------------------|-------------------------------|-------------|--------------------------------------------------------------------|------------------------|----------------------------|---------------------|-----|-----|------|---|---|----|-----|-----|-----|---|-----|------|---|-----|------|------|------|
| No Response           | Female            | No, but I identify as an ally | No Response | White                                                              | No Response            | I do not have a disability | Upper-Middle Income | 2   | 1.5 | -0.5 | 4 | 3 | -1 | 0   | 0.5 | 0.5 | 3 | 3   | 0    | 2 | 2   | 0    | -1   | -1   |
| No Response           | Male              | No                            | n/a         | Hispanic, Latino, Latin, a LatinX, or Spanish Origin, White        | Mexican American       | I do not have a disability | Upper-Middle Income |     |     |      |   |   |    |     |     |     |   |     |      |   |     |      |      |      |
| Strongly Agree        | No Response       | No Response                   | No Response | No Response                                                        | No Response            | No Response                | No Response         | 2   | 2   | 0    | 2 | 2 | 0  | 1   | 1   | 0   | 2 | 3   | 1    | 2 | 2   | 0    | 1    | 1    |
| Strongly Agree, Agree | Male              | No                            | No Response | Black, African, or African American                                | No Response            | I do not have a disability | Middle Income       | 2.5 | 2.5 | 0    | 2 | 3 | 1  | 0.5 | 1   | 0.5 | 2 | 2   | 0    | 1 | 1   | 0    | 1.5  | 1.5  |
| No Response           | Female, Cisgender | No, but I identify as an ally | N/A         | White                                                              | N/A                    | I do not have a disability | Middle Income       | 0   | 2   | 2    | 5 | 3 | -2 | 0   | 1   | 1   | 2 | 3   | 1    | 2 | 2   | 0    | 2    | 2    |
| No Response           | Male              | No                            | No Response | White                                                              | French, American       | I do not have a disability | High Income         | 2   | 3   | 1    | 1 | 5 | 4  | 1   | 1   | 0   | 3 | 3   | 0    | 2 | 2   | 0    | 5    | 5    |
| No Response           | No Response       | No Response                   | No Response | No Response                                                        | No Response            | No Response                | No Response         | 2   | 3   | 1    | 5 | 4 | -1 | 0   | 0.5 | 0.5 | 2 | 2   | 0    | 2 | 1   | -1   | -0.5 | -0.5 |
| No Response           | Female            | No, but I identify as an ally | N/A         | South Asian (e.g., Indian, Nepali, Pakistani), Multi racial, White | Nepali, French, Jewish | I have a disability        | Lower Income        | 0.5 | 1.5 | 1    | 2 | 2 | 0  | 0.5 | 1   | 0.5 | 2 | 2   | 0    | 2 | 1.5 | -0.5 | 1    | 1    |
| No Response           | Female            | No, but I identify as an ally | No Response | Black, African, or African American                                | No Response            | I do not have a disability | Middle Income       |     |     |      |   |   |    |     |     |     |   |     |      |   |     |      |      |      |
| Strongly Agree        | Male              | No                            | N/A         | Hispanic, Latino, Latin, a LatinX, or Spanish Origin, White        | White, Hispanic        | I do not have a disability | Upper-Middle Income | 1   | 1   | 0    | 1 | 1 | 0  | 0   | 0.5 | 0.5 | 3 | 3   | 0    | 1 | 1   | 0    | 0.5  | 0.5  |
| Agree                 | Female            | No                            | No Response | White                                                              | No Response            | I do not have a disability | Middle Income       | 2.5 | 2   | -0.5 | 1 | 0 | -1 | 0   | 0.5 | 0.5 | 1 | 0.5 | -0.5 | 1 | 1   | 0    | -1.5 | -1.5 |
| No Response           | No Response       | No Response                   | No Response | No Response                                                        | No Response            | No Response                | No Response         |     |     |      |   |   |    |     |     |     |   |     |      |   |     |      |      |      |
| No Response           | Male              | No                            | N/A         | South Asian (e.g., Indian, Nepali, Pakistani)                      | N/A                    | I do not have a disability | Upper-Middle Income | 1   | 0.5 | -0.5 | 1 | 3 | 2  | 0   | 0   | 0   | 2 | 2   | 0    | 2 | 2   | 0    | 1.5  | 1.5  |
| No Response           | No Response       | No Response                   | No Response | No Response                                                        | No Response            | No Response                | No Response         | 2   | 2   | 0    | 5 | 7 | 2  | 0.5 | 0.5 | 0   | 2 | 2   | 0    | 2 | 2   | 0    | 2    | 2    |

|                |             |                               |             |                                               |                                |                            |                     |     |     |      |   |   |    |     |     |      |   |   |    |     |     |      |      |      |
|----------------|-------------|-------------------------------|-------------|-----------------------------------------------|--------------------------------|----------------------------|---------------------|-----|-----|------|---|---|----|-----|-----|------|---|---|----|-----|-----|------|------|------|
| No Response    | No Response | No Response                   | No Response | No Response                                   | No Response                    | No Response                | No Response         | 1   | 2.5 | 1.5  | 0 | 4 | 4  | 0.5 | 0   | -0.5 | 2 | 2 | 0  | 1   | 2   | 1    | 6    | 6    |
| Agree          | Female      | No                            | NA          | Hispanic, Latino, LatinX, or Spanish Origin   | Mexcian American               | I do not have a disability | Middle Income       | 1   | 2   | 1    | 1 | 0 | -1 | 0.5 | 1   | 0.5  | 3 | 3 | 0  | 1   | 1   | 0    |      |      |
| Agree          | Non binary  | Yes                           | No Response | Black, African, or African American, White    | Im just mixed, black and white | I do not have a disability | Middle Income       |     |     |      |   |   |    |     |     |      |   |   |    |     |     |      |      |      |
| No Response    | Female      | Yes                           | N/A         | White                                         | Caucasian                      | I do not have a disability | Upper-Middle Income | 2   | 3   | 1    | 4 | 4 | 0  | 0.5 | 0.5 | 0    | 2 | 2 | 0  | 2   | 1.5 | -0.5 | 0.5  | 0.5  |
| Strongly Agree | Female      | No                            | No Response | White                                         | No Response                    | I do not have a disability | Upper-Middle Income | 1.5 | 1.5 | 0    | 8 | 6 | -2 | 0   | 0.5 | 0.5  | 2 | 2 | 0  | 1   | 1   | 0    | -1.5 | -1.5 |
| No Response    | Male        | Yes                           | No Response | Hispanic, Latino, LatinX, or Spanish Origin   | Mexcian American               | I have a disability        | Lower Income        | 2   | 2   | 0    | 2 | 1 | -1 | 0   | 1   | 1    | 2 | 2 | 0  | 2   | 1   | -1   | -1   | -1   |
| No Response    | Male        | No, but I identify as an ally | No Response | White                                         | No Response                    | I do not have a disability | Upper-Middle Income | 2   | 2   | 0    | 0 | 0 | 0  | 0.5 | 0.5 | 0    | 2 | 2 | 0  | 1   | 1   | 0    | 0    | 0    |
| No Response    | No Response | No Response                   | No Response | No Response                                   | No Response                    | No Response                | No Response         | 1.5 | 1   | -0.5 | 3 | 5 | 2  | 0   | 0.5 | 0.5  | 1 | 3 | 2  | 1   | 1   | 0    | 4    | 4    |
| No Response    | Female      | No                            | No Response | South Asian (e.g., Indian, Nepali, Pakistani) | Pakistani                      | I do not have a disability | Middle Income       | 0   | 0   | 0    | 1 | 2 | 1  | 0.5 | 0.5 | 0    | 2 | 2 | 0  | 1   | 2   | 1    | 2    | 2    |
| No Response    | No Response | No Response                   | No Response | No Response                                   | No Response                    | No Response                | No Response         | 2.5 | 2.5 | 0    | 2 | 2 | 0  | 0.5 | 0   | -0.5 | 2 | 2 | 0  | 2   | 1   | -1   | -1.5 | -1.5 |
| No Response    | No Response | No Response                   | No Response | No Response                                   | No Response                    | No Response                | No Response         | 0   | 0.5 | 0.5  | 4 | 2 | -2 | 1   | 1   | 0    | 2 | 2 | 0  | 0.5 | 2   | 1.5  | 0    | 0    |
|                |             |                               |             |                                               |                                |                            |                     |     |     |      |   |   |    |     |     |      |   |   |    |     |     |      |      |      |
| Strongly Agree | Female      | Prefer not to say             | No Response | Black, African, or African American           | No Response                    | I do not have a disability | Middle Income       | 3   | 3   | 0    | 7 | 7 | 0  | 1   | 1   | 0    | 3 | 2 | -1 | 2   | 2   | 0    | -1   | -1   |
| Agree          | Male        | No, but I identify as an ally | No Response | White                                         | No Response                    | I do not have a disability | Upper-Middle Income | 2   | 2   | 0    | 4 | 5 | 1  | 1   | 1   | 0    | 2 | 3 | 1  | 0.5 | 2   | 1.5  | 3.5  | 3.5  |
| Agree          | Female      | No, but I identify as an ally | N/A         | Hispanic, Latino, LatinX, or Spanish Origin   | Mexican American               | I do not have a disability | Middle Income       |     | 1   |      | 0 | 0 | 0  |     | 0   | 0    |   | 2 | 2  |     | 2   | 2    | 4    |      |

|                |             |                                   |                                                                                                         |                                         |                                                                                         |                            |                     |   |   |    |   |   |    |     |     |   |     |   |     |   |   |   |     |     |
|----------------|-------------|-----------------------------------|---------------------------------------------------------------------------------------------------------|-----------------------------------------|-----------------------------------------------------------------------------------------|----------------------------|---------------------|---|---|----|---|---|----|-----|-----|---|-----|---|-----|---|---|---|-----|-----|
| Agree          | Male        | Other (see freeform answer below) | No, but I might identify as an ally depending on what it means. I don't know what the exact meaning is. | White                                   | Honestly, I don't know what kind of white I am. I think I might be a little bit German. | I do not have a disability | Middle Income       | 2 | 2 | 0  | 5 | 5 | 0  | 1   | 1   | 0 | 3   | 3 | 0   | 2 | 2 | 0 | 0   | 0   |
| Strongly Agree | Female      | No, but I identify as an ally     | No Response                                                                                             | White                                   | American                                                                                | I do not have a disability | Upper-Middle Income | 1 | 0 | -1 | 0 | 6 | 6  | 0.5 | 0.5 | 0 | 1.5 | 2 | 0.5 | 2 | 2 | 0 | 5.5 | 5.5 |
| Agree          | Male        | No, but I identify as an ally     | n/a                                                                                                     | White                                   | Swiss                                                                                   | I do not have a disability | Upper-Middle Income | 2 | 1 | -1 | 2 | 3 | 1  | 1   | 1   | 0 | 2   | 2 | 0   | 2 | 2 | 0 | 0   | 0   |
| Strongly Agree | Male        | No                                | N/A                                                                                                     | White                                   | German & Polish                                                                         | I do not have a disability | Upper-Middle Income | 3 | 3 | 0  | 5 | 4 | -1 | 1   | 1   | 0 | 3   | 3 | 0   | 1 | 1 | 0 | -1  | -1  |
| Agree          | Female      | No                                | n/a                                                                                                     | White                                   | German, English, American                                                               | I do not have a disability | Upper-Middle Income | 3 | 3 | 0  | 3 | 2 | -1 | 1   | 1   | 0 | 2   | 2 | 0   | 2 | 2 | 0 | -1  | -1  |
| Agree          | Female      | No, but I identify as an ally     | n/a                                                                                                     | White                                   | n/a                                                                                     | I do not have a disability | Upper-Middle Income | 2 | 3 | 1  | 3 | 6 | 3  | 1   | 1   | 0 | 2   | 2 | 0   | 2 | 2 | 0 | 4   | 4   |
| No Response    | Female      | Yes                               | Pansexual                                                                                               | White                                   | White, German                                                                           | I do not have a disability | Lower Income        | 0 | 2 | 2  | 5 | 7 | 2  | 0.5 | 0.5 | 0 | 1   | 3 | 2   | 2 | 2 | 0 | 6   | 6   |
| Neutral        | No Response | No Response                       | No Response                                                                                             | No Response                             | No Response                                                                             | No Response                | No Response         | 2 | 3 | 1  | 8 | 8 | 0  | 1   | 1   | 0 | 3   | 3 | 0   | 1 | 1 | 0 | 1   | 1   |
| Strongly Agree | Male        | No, but I identify as an ally     | No Response                                                                                             | White                                   | Irish                                                                                   | I do not have a disability | Lower-Middle Income | 2 | 2 | 0  | 3 | 4 | 1  | 1   | 1   | 0 | 2   | 2 | 0   | 2 | 2 | 0 | 1   | 1   |
| Strongly Agree | Male        | No                                | N/A                                                                                                     | American Indian or Alaska Native, White | German, Irish, Native American.                                                         | I do not have a disability | Middle Income       | 0 | 1 | 1  | 4 | 7 | 3  | 1   | 1   | 0 | 2   | 2 | 0   | 2 | 2 | 0 | 4   | 4   |
| Agree          | Male        | No                                | I'm Straight                                                                                            | Middle Eastern or North African, White  | Saudi Arabia                                                                            | I do not have a disability | Upper-Middle Income |   | 1 |    |   | 1 |    |     | 0   |   | 1   |   |     | 2 |   |   |     |     |



|                |                   |                               |                                      |                                                            |                                                |                            |                     |   |     |     |   |   |    |     |     |     |   |   |    |     |   |     |     |     |
|----------------|-------------------|-------------------------------|--------------------------------------|------------------------------------------------------------|------------------------------------------------|----------------------------|---------------------|---|-----|-----|---|---|----|-----|-----|-----|---|---|----|-----|---|-----|-----|-----|
| Agree          | Female, Cisgender | Yes                           | No Response                          | White                                                      | n/a                                            | I have a disability        | Lower-Middle Income | 0 | 0   | 0   | 5 | 5 | 0  | 1   | 1   | 0   | 3 | 3 | 0  | 2   | 1 | -1  | -1  | -1  |
| Strongly Agree | Male              | No                            | No Response                          | White                                                      | No Response                                    | I do not have a disability | Middle Income       | 1 | 2   | 1   | 2 | 5 | 3  | 1   | 1   | 0   | 3 | 2 | -1 | 1.5 | 2 | 0.5 | 3.5 | 3.5 |
| Agree          | Female            | No                            | N/A                                  | White                                                      | Irish, Polish                                  | I do not have a disability | Upper-Middle Income | 0 | 0   | 0   | 5 | 7 | 2  | 1   | 1   | 0   | 3 | 3 | 0  | 1.5 | 2 | 0.5 | 2.5 | 2.5 |
| Strongly Agree | No Response       | No Response                   | No Response                          | No Response                                                | No Response                                    | No Response                | No Response         | 2 | 2   | 0   | 2 | 6 | 4  | 0.5 | 1   | 0.5 | 2 | 3 | 1  | 2   | 2 | 0   | 5.5 | 5.5 |
| Agree          | Female            | Yes                           | Female, Queer                        | Hispanic, Latino, Latina, LatinX, or Spanish Origin, White | Hispanic from Mexico                           | Prefer not to say          | Upper-Middle Income | 3 | 3   | 0   | 1 | 4 | 3  | 1   | 1   | 0   | 3 | 3 | 0  | 2   | 2 | 0   | 3   | 3   |
| No Response    | No Response       | No Response                   | No Response                          | No Response                                                | No Response                                    | No Response                | No Response         | 0 | 0   | 0   | 0 | 0 | 0  | 0   | 0   | 0   | 0 | 2 | 2  | 0   | 2 | 2   | 4   | 4   |
| Strongly Agree | Male              | No                            | No Response                          | White                                                      | No Response                                    | I do not have a disability | Middle Income       | 2 | 2   | 0   | 1 | 3 | 2  | 0.5 | 0.5 | 0   | 2 | 2 | 0  | 0   | 2 | 2   | 4   | 4   |
| Strongly Agree | Male              | No, but I identify as an ally | No Response                          | White                                                      | Italian/Scottish                               | I have a disability        | Upper-Middle Income | 2 | 2   | 0   | 4 | 7 | 3  | 1   | 1   | 0   | 2 | 2 | 0  | 2   | 2 | 0   | 3   | 3   |
| Strongly Agree | Male              | No                            | Male                                 | East Asian (e.g., Chinese, Japanese, Korean)               | Chinese (Cantonese)                            | I do not have a disability | Upper-Middle Income | 1 | 3   | 2   | 6 | 4 | -2 | 1   | 1   | 0   | 3 | 3 | 0  | 2   | 2 | 0   | 0   | 0   |
| Strongly Agree | No Response       | No Response                   | No Response                          | No Response                                                | No Response                                    | No Response                | No Response         | 2 | 2   | 0   |   |   | 0  | 1   | 1   | 0   | 3 | 2 | -1 | 2   | 2 |     |     |     |
| Agree          | Male              | Yes                           | I identify as a he/him gay cis male. | Hispanic, Latino, Latina, LatinX, or Spanish Origin        | Hispanic                                       | I do not have a disability | Lower-Middle Income | 1 | 2.5 | 1.5 | 5 | 6 | 1  | 1   | 1   | 0   | 2 | 2 | 0  | 2   | 0 | -2  | 0.5 | 0.5 |
| Strongly Agree | Male              | No                            | N/A                                  | White                                                      | 50% Irish, 50% mix of other European countries | I do not have a disability | Upper-Middle Income | 1 |     |     | 6 |   |    | 0.5 |     |     | 2 |   |    | 2   |   |     | 0   |     |

|                |             |                               |               |                                                                                              |                                                   |                            |                     |     |     |      |   |   |    |     |     |      |     |   |     |   |   |    |      |      |
|----------------|-------------|-------------------------------|---------------|----------------------------------------------------------------------------------------------|---------------------------------------------------|----------------------------|---------------------|-----|-----|------|---|---|----|-----|-----|------|-----|---|-----|---|---|----|------|------|
| Agree          | Female      | Yes                           | No Response   | Hispanic, Latino, Latina, LatinX, or Spanish Origin                                          | Mexican American                                  | I have a disability        | Lower-Middle Income | 2   | 2   | 0    | 3 | 0 | -3 | 1   | 1   | 0    | 2   | 2 | 0   | 2 | 2 | 0  | -3   | -3   |
| Agree          | Female      | No, but I identify as an ally | N/A           | South Asian (e.g., Indian, Nepali, Pakistani)                                                | Bangladeshi                                       | I do not have a disability | Lower-Middle Income | 1.5 | 1   | -0.5 | 3 | 5 | 2  | 1   | 1   | 0    | 2   | 2 | 0   | 2 | 2 | 0  | 1.5  | 1.5  |
| No Response    | Male        | No, but I identify as an ally | No Response   | White                                                                                        | Norwegian, Scottish, Welsh                        | I do not have a disability | Middle Income       | 0   | 0   | 0    | 0 | 2 | 2  | 0.5 | 0.5 | 0    | 3   | 3 | 0   | 2 | 1 | -1 | 1    | 1    |
| Strongly Agree | Female      | Yes                           | N/A           | Hispanic, Latino, Latina, LatinX, or Spanish Origin                                          | Mexican American                                  | I do not have a disability | Middle Income       |     | 2   |      | 0 | 7 |    |     | 1   |      |     | 3 |     |   | 2 |    | 0    |      |
| Agree          | Female      | No, but I identify as an ally | I am a female | South Asian (e.g., Indian, Nepali, Pakistani)                                                | I am Indian.                                      | I do not have a disability | High Income         | 2   | 0   | -2   | 6 | 7 | 1  | 0.5 | 0   | -0.5 | 2   | 2 | 0   | 1 | 1 | 0  | -1.5 | -1.5 |
| Agree          | No Response | No Response                   | No Response   | No Response                                                                                  | No Response                                       | No Response                | No Response         |     |     |      |   |   |    |     |     |      |     |   |     |   |   |    |      |      |
| Neutral        | Male        | No                            | No Response   | South Asian (e.g., Indian, Nepali, Pakistani), Multi racial, White                           | British, half scottish, half pakistani            | I do not have a disability | Lower-Middle Income | 2.5 | 2   | -0.5 | 5 | 4 | -1 | 1   | 1   | 0    | 2   | 2 | 0   | 2 | 2 | 0  | -1.5 | -1.5 |
| Agree          | No Response | No Response                   | No Response   | No Response                                                                                  | No Response                                       | No Response                | No Response         |     |     |      |   |   |    |     |     |      |     |   |     |   |   |    |      |      |
| Strongly Agree | Male        | Prefer not to say             | unsure        | Hispanic, Latino, Latina, LatinX, or Spanish Origin, White                                   | Brazilian-American                                | I have a disability        | Middle Income       | 1   | 2   | 1    | 0 | 6 | 6  | 1   | 1   | 0    | 2.5 | 3 | 0.5 | 2 | 2 | 0  | 7.5  | 7.5  |
| Agree          | Female      | No, but I identify as an ally | N/A           | Hispanic, Latino, Latina, LatinX, or Spanish Origin                                          | Mexican American                                  | I do not have a disability | Middle Income       | 1   | 1   | 0    | 3 | 6 | 3  | 1   | 1   | 0    | 3   | 3 | 0   | 2 | 2 | 0  | 3    | 3    |
| Agree          | Female      | No                            | No Response   | White                                                                                        | No Response                                       | I do not have a disability | Upper-Middle Income | 1   | 1.5 | 0.5  | 4 | 7 | 3  | 1   | 1   | 0    | 2   | 2 | 0   | 2 | 2 | 0  | 3.5  | 3.5  |
| Agree          | Male        | No                            | N/A           | American Indian or Alaska Native, Hispanic, Latino, Latina, LatinX, or Spanish Origin, White | Native American, Mexican American, Spanish, Irish | I do not have a disability | Middle Income       | 1   | 2   | 1    | 7 | 6 | -1 | 1   | 1   | 0    | 2   | 2 | 0   | 2 | 2 | 0  | 0    | 0    |

|                |             |                               |                                          |                                                                                                                             |                                     |                            |                      |     |     |      |   |   |    |     |     |   |   |   |    |   |   |    |      |      |
|----------------|-------------|-------------------------------|------------------------------------------|-----------------------------------------------------------------------------------------------------------------------------|-------------------------------------|----------------------------|----------------------|-----|-----|------|---|---|----|-----|-----|---|---|---|----|---|---|----|------|------|
| Strongly Agree | Male        | Yes                           | No Response                              | Hispanic, Latino, Latina, LatinX, or Spanish Origin                                                                         | Brazilian-American                  | I do not have a disability | Lower-Middle Income  | 1   | 2   | 1    | 2 | 4 | 2  | 0.5 | 0.5 | 0 | 2 | 3 | 1  | 2 | 2 | 0  | 4    | 4    |
| Strongly Agree | Female      | No                            | N/A                                      | East Asian (e.g., Chinese, Japanese, Korean)                                                                                | Taiwanese                           | I do not have a disability | Middle Income        | 1.5 | 1   | -0.5 | 6 | 6 | 0  | 1   | 1   | 0 | 2 | 3 | 1  | 1 | 2 | 1  | 1.5  | 1.5  |
| Agree          | Female      | No, but I identify as an ally | I am straight                            | Hispanic, Latino, Latina, LatinX, or Spanish Origin, Southeast Asian (e.g., Cambodian, Indonesian, Thai, Malaysian)), White | Filipina, Puerto Rican, German      | I have a disability        | Middle Income        | 2.5 | 3   | 0.5  | 2 | 4 | 2  | 1   | 1   | 0 | 1 | 3 | 2  | 2 | 2 | 0  | 4.5  | 4.5  |
| Strongly Agree | Male        | Yes                           | No Response                              | White                                                                                                                       | No Response                         | I do not have a disability | Prefer not to answer | 2   | 3   | 1    | 4 | 7 | 3  | 1   | 1   | 0 | 3 | 3 | 0  | 2 | 1 | -1 | 3    | 3    |
| Neutral        | No Response | No Response                   | No Response                              | No Response                                                                                                                 | No Response                         | No Response                | No Response          | 1   | 1   | 0    | 6 | 5 | -1 | 1   | 1   | 0 | 2 | 2 | 0  | 2 | 2 | 0  |      |      |
| Strongly Agree | Male        | No                            | He/him                                   | Hispanic, Latino, Latina, LatinX, or Spanish Origin                                                                         | Spaniard                            | I do not have a disability | Upper-Middle Income  | 0   | 0   | 0    | 4 | 4 | 0  | 1   | 1   | 0 | 3 | 2 | -1 | 2 | 2 | 0  | -1   | -1   |
| Strongly Agree | Female      | Yes                           | No Response                              | White                                                                                                                       | Polish, German                      | I do not have a disability | Upper-Middle Income  | 2.5 | 3   | 0.5  | 2 | 5 | 3  | 1   | 1   | 0 | 2 | 3 | 1  | 2 | 2 | 0  | 4.5  | 4.5  |
| Strongly Agree | Female      | Yes                           | The questions above capture my identity. | White                                                                                                                       | White- Scottish and German ancestry | I do not have a disability | Upper-Middle Income  | 1.5 | 1.5 | 0    | 7 | 6 | -1 | 1   | 1   | 0 | 3 | 3 | 0  | 2 | 2 | 0  | -1   | -1   |
| Strongly Agree | Female      | No, but I identify as an ally | No Response                              | Hispanic, Latino, Latina, LatinX, or Spanish Origin                                                                         | Mexican                             | I do not have a disability | Lower Income         | 0   | 1   | 1    | 5 | 5 | 0  | 1   | 1   | 0 | 2 | 2 | 0  | 1 | 2 | 1  | 2    | 2    |
| Strongly Agree | Female      | Yes                           | N/A                                      | Prefer not to say                                                                                                           | Indian.                             | Prefer not to say          | Prefer not to answer | 1.5 | 1   | -0.5 | 4 | 4 | 0  | 0   | 0   | 0 | 2 | 2 | 0  | 2 | 2 | 0  | -0.5 | -0.5 |
| Agree          | Non binary  | Yes                           | No Response                              | Hispanic, Latino, Latina, LatinX, or Spanish Origin                                                                         | Mexican American                    | I do not have a disability | Upper-Middle Income  | 1   | 3   | 2    | 7 | 7 | 0  | 1   | 1   | 0 | 3 | 3 | 0  | 2 | 2 | 0  | 2    | 2    |
| Strongly Agree | No Response | No Response                   | No Response                              | No Response                                                                                                                 | No Response                         | No Response                | No Response          | 1   | 2.5 | 1.5  | 6 | 3 | -3 | 0   | 1   | 1 | 1 | 2 | 1  | 2 | 2 | 0  | 0.5  | 0.5  |

|                |             |             |             |                                                              |                      |                               |               |   |   |   |   |   |   |   |   |    |   |   |    |   |   |   |    |    |
|----------------|-------------|-------------|-------------|--------------------------------------------------------------|----------------------|-------------------------------|---------------|---|---|---|---|---|---|---|---|----|---|---|----|---|---|---|----|----|
| Strongly Agree | Male        | No          | Straight    | East Asian<br>(e.g., Chinese,<br>Japanese,<br>Korean), White | Bulgarian, Taiwanese | I do not have a<br>disability | Middle Income | 0 | 0 | 0 | 3 | 3 | 0 | 1 | 0 | -1 | 2 | 1 | -1 | 2 | 2 | 0 | -2 | -2 |
| No Response    | No Response | No Response | No Response | No Response                                                  | No Response          | No Response                   | No Response   | 2 |   |   | 0 |   |   | 1 |   | 2  |   |   | 1  |   |   | 0 | 0  |    |
