# Supplementary material
Source: publisher figshare collection journal article supplement (https://tandf.figshare.com/articles/dataset/_/23596523)
Supplement: Supplementary file 11 [file 1]

## **“Reef Survivor” Print and Play Instructions**

Almost all Print and Play elements can be printed on 8.5” x 11” paper or cardstock (you will also need D12 dice, the same number as the number of players). We suggest 100lb card stock, 65lb or plain paper would work but it will be harder to work with and will not last as long. In the instructions below, a table is 4 “players” (each player group can be 1 to 3 students, so for 24 students there could be between 2 and 6 tables).

**Gameplay booklet:** Print off two (or more) Gameplay booklets on paper (double sided, short edge binding).

**The Game Boards:** Print off at least one of each kind of reef board per table on cardstock (it’s good to print several extras, that way multiple players can have the same board).

**The Coral Triangle:** On cardstock, print off one Coral Triangle Board per table.

**Nurseries:** On cardstock, print off one nursery board per player; each PDF makes 2 nursery boards; cut in half.

**Disaster Cards:** Print off the card set on cardstock (double sided, short edge binding); cut the cards out.

**Organism tokens:** On cardstock, print off the Print and Play organisms (P&P Builders, Dwellers, and coverers); instructions for the number of copies per table are in the file names/on the image.

**Mutation tokens:** On cardstock, print off the mutation tokens (three copies per table).

**Cheat Sheets:** On cardstock, print off copies of the “cheat sheet”, 2 for each table should be sufficient.

**Order of Operations Cheat Sheets:** Print off copies of the “cheat sheet” for each player on paper. Each PDF makes 2 cheat sheets, they can be cut in half if printed double sided (short edge binding) or folded if printed single sided.

**Notebooks:** Print off one “notebook” on paper for each student (it’s good to have a few extras on hand in case there are any user errors).

**Scoreboard:** Print off one scoreboard for each table (on cardstock).

***Note:** If you want to play with more than 4 players, you will need to print more reef gameboards, nurseries, cheat sheets, notebooks, organism tokens, and mutation tokens.*
